# Supplementary material
Source: publisher figshare collection journal article supplement (https://acs.figshare.com/ndownloader/files/4564351)

## Total Synthesis of (–)-Bitungolide F

Yingpeng Su<sup>†</sup>, Yanfen Xu<sup>†</sup>, Junjie Han<sup>†</sup>, Jiyue Zheng<sup>†</sup>, Jing Qi<sup>†</sup>, Tuo Jiang<sup>†</sup>, Xinfu

Pan<sup>†</sup> and Xuegong She<sup>\*,†,‡</sup>

<sup>†</sup>State Key Laboratory of Applied Organic Chemistry, Department of Chemistry, Lanzhou University, Lanzhou 730000, P. R. China and <sup>‡</sup>State Key Laboratory for Oxo Synthesis and Selective Oxidation, Lanzhou Institute of Chemical Physics, Chinese Academy of Sciences, Lanzhou 730000, P. R. China

shexg@lzu.edu.cn

### Table of Contents

#### 1. Experimental procedures and data for the compounds

|                              | <b><u>Page</u></b> |
|------------------------------|--------------------|
| General Experimental Details | S3                 |
| TBDPS Ether <b>17</b>        | S3                 |
| Ester <b>14</b>              | S3                 |
| Acetonide Ester <b>19</b>    | S4                 |
| Alcohol <b>20</b>            | S5                 |
| Iodide <b>13</b>             | S5                 |
| MOM Ether <b>25</b>          | S6                 |
| Alcohol <b>8</b>             | S6                 |
| Aldehyde <b>26</b>           | S7                 |
| Enoate <b>27</b>             | S7                 |
| Enoate Alcohol <b>28</b>     | S8                 |
| Enoate <b>30</b>             | S9                 |
| Imide Acetate <b>10</b>      | S9                 |
| Triflate <b>33</b>           | S10                |
| Alcohol <b>34</b>            | S11                |

## 2. Spectra (<sup>1</sup>H and <sup>13</sup>C NMR) of compounds

|                                          | <b><u>Page</u></b> |
|------------------------------------------|--------------------|
| TBDPS Ether <b>17</b>                    | S12-S13            |
| Ester <b>14</b>                          | S14-S15            |
| Dihydroxyl Ester <b>18</b>               | S16-S17            |
| Acetonide Ester <b>19</b>                | S18-S19            |
| Alcohol <b>20</b>                        | S20-S21            |
| Iodide <b>13</b>                         | S22-S23            |
| Amide <b>21</b>                          | S24-S25            |
| Alcohol <b>22</b>                        | S26-S27            |
| Aldehyde <b>23</b>                       | S28-S29            |
| Imide Alcohol <b>11</b>                  | S30-S31            |
| MOM Ether <b>25</b>                      | S32-S33            |
| Alcohol <b>8</b>                         | S34-S35            |
| Aldehyde <b>26</b>                       | S36-S37            |
| Enoate <b>27</b>                         | S38-S39            |
| Enoate Alcohol <b>28</b>                 | S40-S41            |
| Enoate <b>30</b>                         | S42-S43            |
| Imide Acetate <b>10</b>                  | S44-S45            |
| $\beta$ -Keto Lactone <b>32</b>          | S46-S47            |
| Triflate <b>33</b>                       | S48-S49            |
| $\delta$ -Lactone <b>9</b>               | S50-S51            |
| Alcohol <b>34</b>                        | S52-S53            |
| Acetonide <b>36</b>                      | S54-S55            |
| Synthetic (–)-bitungolide F ( <b>6</b> ) | S56-S57            |

## 1. Experimental procedures and data for the compounds

**General Experimental Details.** Oxygen- and moisture-sensitive reactions were carried out under argon atmosphere. Solvents were purified and dried by standard methods prior to use. All commercially available reagents were used without further purification unless otherwise noted. Column chromatography was performed on silica gel (200-300 mesh). Optical rotations were measured on a precision automated polarimeter. Infrared spectra were recorded on a FT-IR spectrometer.  $^1\text{H}$  NMR and  $^{13}\text{C}$  NMR spectra were recorded on a 300 MHz and a 400 MHz spectrometers. Chemical shifts are reported as  $\delta$  values relative to internal chloroform ( $\delta$  7.26 for  $^1\text{H}$  NMR and 77.0 for  $^{13}\text{C}$  NMR) and internal acetone ( $\delta$  2.05 for  $^1\text{H}$  NMR and 29.9 for  $^{13}\text{C}$  NMR).

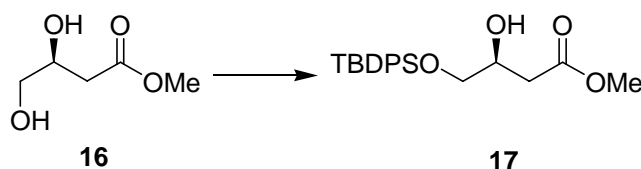

**TBDPS Ether 17.** To a solution of diol **16** (402 mg, 3 mmol) in  $\text{CH}_2\text{Cl}_2$  (15 mL) at 0 °C was added  $\text{Et}_3\text{N}$  (333 mg, 3.3 mmol),  $N,N$ -4-dimethylaminopyridine (37 mg, 0.1 mmol) and TBDPSCl (908 mg, 3.3 mmol). The mixture was stirred at 0 °C for 15 min and then at rt for 3 h. Water (30 mL) was added and the mixture was stirred for additional 15 min. The organic layer was separated and the aqueous layer was extracted with  $\text{CH}_2\text{Cl}_2$  ( $3 \times 10$  mL). The combined organic extracts was washed with brine, dried over  $\text{Na}_2\text{SO}_4$ , filtered and concentrated under reduced pressure. The residue was purified by flash column chromatography (Hexane:EtOAc, 8:1) to afford TBDPS ether **17** (1.004 g, 90%) as a colorless oil:  $[\alpha]_{\text{D}}^{20} = -10$  ( $c = 2.00$ ,  $\text{CHCl}_3$ );  $^1\text{H}$  NMR (300 MHz,  $\text{CDCl}_3$ ):  $\delta$  1.09 (s, 9 H), 2.58 (m, 2 H), 2.96 (d,  $J = 4.5$  Hz, 1 H), 3.67 (m, 2 H), 3.69 (s, 3 H), 4.18 (m, 1 H), 7.45 (m, 6 H), 7.68 (m, 4 H);  $^{13}\text{C}$  NMR (75 MHz,  $\text{CDCl}_3$ )  $\delta$  19.2, 26.8, 37.8, 51.7, 66.8, 68.6, 127.7, 129.8, 132.9, 133.0, 135.5, 172.4; IR (KBr)  $\nu_{\text{max}}$  3472, 3070, 2932, 1737, 1431, 1111, 704  $\text{cm}^{-1}$ ; HRMS (ESIMS) calcd for  $\text{C}_{21}\text{H}_{28}\text{O}_4\text{SiNa}$   $[\text{M} + \text{Na}]^+$  395.1649, found 395.1656.

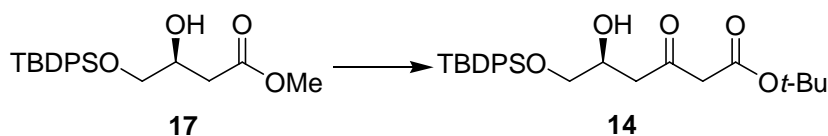

**Ester 14.** A solution of diisopropylamine (1.8 mL, 12.9 mmol) in THF (20 mL) was cooled to - 40 °C. *n*-Butyllithium (1.55 M in hexanes, 8 mL, 12.5 mmol) was added dropwise via a syringe. The

mixture was stirred for 10 min at -40 °C and at 0 °C for 30 min. After recooling to -40 °C, *t*-BuOAc (1.61 mL, 12 mmol) was added dropwise and the mixture was stirred for 30 min at -40 °C followed by addition of TBDPS ether **17** (1.116 g, 3 mmol) in THF (6 mL). The mixture was stirred for 15 min and for 2 h after warming to 0 °C. The reaction mixture was quenched with water (40 mL). The organic layer was separated and the aqueous layer was extracted with EtOAc (3 × 30 mL). The combined organic extracts was washed with brine, dried over Na<sub>2</sub>SO<sub>4</sub>, filtered and concentrated under reduced pressure. The residue was purified by flash column chromatography (Hexane:EtOAc, 8:1) to afford  $\delta$ -hydroxyl- $\beta$ -keto ester **14** (1.162 g, 85%) as a colorless oil:  $[\alpha]_D^{20} = -14$  ( $c = 2.60$ , CHCl<sub>3</sub>); <sup>1</sup>H NMR (400 MHz, CDCl<sub>3</sub>):  $\delta$  1.09 (s, 9 H), 1.48 (s, 9 H), 2.75 (d,  $J = 6.4$  Hz, 2 H), 3.41 (s, 2 H), 3.66 (s, 3 H), 4.23 (m, 1 H), 7.45 (m, 6 H), 7.67 (m, 4 H); <sup>13</sup>C NMR (100 MHz, CDCl<sub>3</sub>)  $\delta$  19.2, 26.8, 27.9, 28.3, 45.9, 51.2, 67.0, 68.1, 82.0, 127.8, 129.8, 133.0 (2), 135.5 (2), 166.2, 202.8; IR (KBr)  $\nu_{\max}$  3464, 3071, 2932, 1734, 1714, 1255, 1148, 1111, 705 cm<sup>-1</sup>; HRMS (ESIMS) calcd for C<sub>26</sub>H<sub>36</sub>O<sub>5</sub>SiNa [M + Na]<sup>+</sup> 479.2224, found 479.2228.

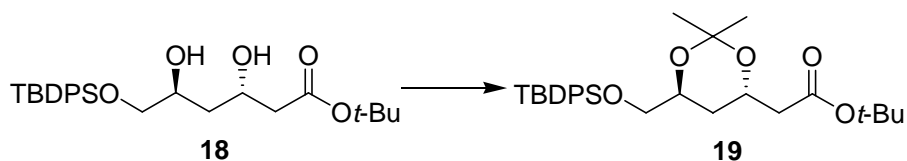

**Acetonide Ester 19.** To a solution of diol **18** (870 mg, 1.9 mmol) in CH<sub>2</sub>Cl<sub>2</sub> (20 mL) was added 2,2-dimethoxypropane (2.3 mL, 19 mmol) and PPTS (48 mg, 0.2 mmol) in ambient atmosphere. After stirring for 10 h at rt, saturated NaHCO<sub>3</sub> (aq.) was added and the mixture was stirred for additional 10 min. The organic layer was separated and the aqueous layer was extracted with CH<sub>2</sub>Cl<sub>2</sub> (3 × 10 mL). The combined organic layers was dried over Na<sub>2</sub>SO<sub>4</sub>, filtered and concentrated under reduced pressure. The residue was purified by flash column chromatography (Hexane:EtOAc, 30:1) to give acetonide ester **19** (888 mg, 94%) as colorless liquid:  $[\alpha]_D^{20} = -18.5$  ( $c = 7.00$ , CHCl<sub>3</sub>); <sup>1</sup>H NMR (300 MHz, CDCl<sub>3</sub>):  $\delta$  1.07 (s, 9 H), 1.35 (s, 3 H), 1.37 (s, 3 H), 1.46 (s, 9 H), 1.59 (m, 1 H), 1.73 (m, 1 H), 2.39 (m, 2 H), 3.63 (dd,  $J = 10.5$  Hz,  $J = 4.5$  Hz, 1 H), 3.73 (dd,  $J = 10.5$  Hz,  $J = 6.0$  Hz, 1 H), 3.95 (m, 1 H), 4.21 (m, 1 H), 7.41 (m, 6 H), 7.69 (m, 4 H); <sup>13</sup>C NMR (75 MHz, CDCl<sub>3</sub>)  $\delta$  19.3, 24.7, 24.9, 26.8, 28.1, 33.9, 42.3, 63.8, 66.6, 67.5, 80.5, 100.4, 127.6 (2), 129.6, 133.7 (2), 135.6, 135.7, 170.2; IR (KBr)  $\nu_{\max}$  2933, 1732, 1368, 1224, 1148, 1112, 704 cm<sup>-1</sup>; HRMS (ESIMS) calcd for C<sub>29</sub>H<sub>42</sub>O<sub>5</sub>SiNa [M + Na]<sup>+</sup> 521.2694, found 521.2699.



66.6, 67.6, 100.4, 127.6 (2), 129.6, 133.6, 133.7, 135.6, 135.7; IR (KBr)  $\nu_{\max}$  2932, 1225, 1110, 703  $\text{cm}^{-1}$ ; HRMS (ESIMS) calcd for  $\text{C}_{25}\text{H}_{35}\text{IO}_3\text{SiNa}$   $[\text{M} + \text{Na}]^+$  561.1292, found 561.1288.

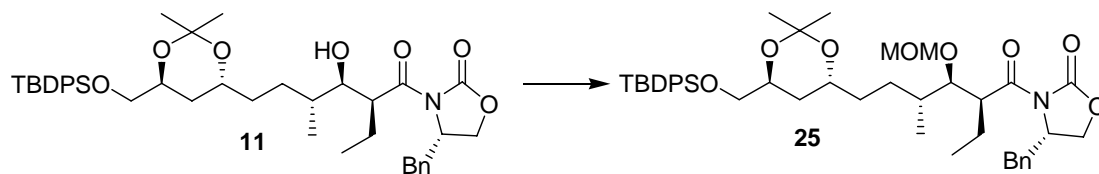

**MOM Ether 25.** To a solution of imide alcohol **11** (1.877 g, 2.63 mmol) in  $\text{CH}_2\text{Cl}_2$  (20 mL) at 0 °C was added diisopropylethylamine (7.4 mL, 52.5 mmol), chloromethylmethyl ether (2 mL, 26.3 mmol) and tetrabutylammonium iodide (100 mg, 0.26 mmol). The reaction mixture was immediately allowed to warm to rt. After 18 h of being stirred, saturated  $\text{NaHCO}_3$  (aq.) was added. The organic layer was separated and the aqueous layer was extracted with  $\text{CH}_2\text{Cl}_2$  ( $3 \times 15$  mL). The combined organic layers was washed with brine (10 mL), dried over  $\text{Na}_2\text{SO}_4$ , filtered and concentrated under reduced pressure. The residue was purified by flash column chromatography (Hexanes:EtOAc, 10:1) to provide MOM ether **25** (1.90g, 92%) as a colorless oil:  $^1\text{H}$  NMR (300 MHz,  $\text{CDCl}_3$ ):  $\delta$  0.97 (m, 6 H), 1.05 (s, 9 H), 1.28 (m, 1 H), 1.31 (s, 6 H), 1.52 (m, 2 H), 1.65 (m, 4 H), 1.91 (m, 1 H), 2.73 (dd,  $J = 12.9$  Hz,  $J = 9.9$  Hz, 1 H), 3.35 (s, 3 H), 3.39 (m, 1 H), 3.60 (m, 2 H), 3.68 (m, 2 H), 3.74 (m, 2 H), 3.95 (m, 2 H), 4.13 (d,  $J = 4.8$  Hz, 2 H), 4.60 (m, 3 H), 7.24 (m, 2 H), 7.37 (m, 9 H), 7.68 (m, 4 H);  $^{13}\text{C}$  NMR (75 MHz,  $\text{CDCl}_3$ )  $\delta$  12.0, 15.9, 19.2, 19.9, 24.7, 24.8, 26.7, 27.7, 33.7, 34.6, 37.0, 37.8, 47.4, 56.1, 56.4, 65.9, 66.7, 66.8, 67.7, 84.7, 98.5, 100.0, 127.3, 127.5 (2), 128.9, 129.4, 129.5, 133.6, 135.5, 135.6, 135.7, 153.1, 174.6; IR (KBr)  $\nu_{\max}$  3517, 3069, 2960, 2933, 1783, 1737, 1695, 1458, 1383, 1224, 1110, 704  $\text{cm}^{-1}$ ; HRMS (ESIMS) calcd for  $\text{C}_{44}\text{H}_{61}\text{NO}_8\text{SiNa}$   $[\text{M} + \text{Na}]^+$  782.4059, found 782.4065.

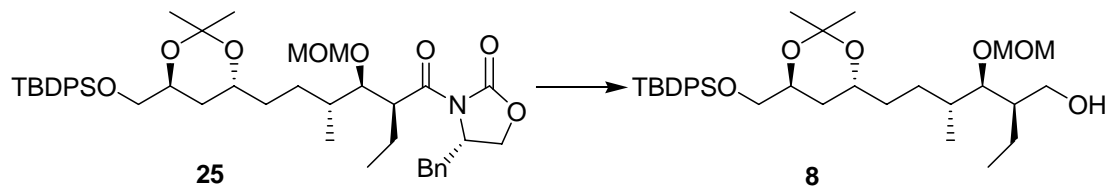

**Alcohol 8.** To a solution of **25** (1.80 g, 2.37 mmol) in THF (7.5 mL) was added a solution of  $\text{NaBH}_4$  (450 mg, 11.86 mmol) in  $\text{H}_2\text{O}$  (2.5 mL) at 0 °C. The mixture was stirred at 0 °C for 5 min, warmed to rt and stirred overnight. The reaction was quenched by addition of saturated  $\text{NH}_4\text{Cl}$  (aq.) followed by stirring for additional 30min. The organic layer was separated and the aqueous

layer was extracted with EtOAc (3 × 15 mL). The combined organic layers was washed with saturated NaHCO<sub>3</sub> (10 mL), H<sub>2</sub>O (10 mL), brine (10 mL), dried over Na<sub>2</sub>SO<sub>4</sub>, filtered and concentrated under reduced pressure. The residue was purified by flash column chromatography (Hexanes:EtOAc, 5:1) to give the alcohol **8** (1.20g, 90%) as a colorless oil: <sup>1</sup>H NMR (300 MHz, CDCl<sub>3</sub>) δ: 0.86 (d, *J* = 6.6 Hz, 3 H), 0.92 (t, *J* = 7.5 Hz, 3 H), 1.06 (s, 9 H), 1.21 (m, 3 H), 1.34 (s, 3 H), 1.35 (s, 3 H), 1.60 (m, 7 H), 3.01 (m, 1 H), 3.42 (s, 3 H), 3.47 (dd, *J* = 8.7 Hz, 2.4 Hz, 1 H), 3.61 (m, 1 H), 3.62 (dd, *J* = 10.5 Hz, *J* = 4.5 Hz, 1 H), 3.70 (m, 2 H), 3.71 (dd, *J* = 10.5 Hz, *J* = 6.0 Hz 1 H), 3.94 (m, 1 H), 4.67 (s, 2 H), 7.40 (m, 6 H), 7.70 (m, 4 H); <sup>13</sup>C NMR (75 MHz, CDCl<sub>3</sub>) δ: 12.4, 15.9, 18.1, 19.2, 24.8 (2), 26.7, 28.3, 33.2, 34.7, 35.6, 43.4, 56.1, 62.7, 66.7, 66.8, 67.6, 84.4, 98.9, 100.1, 127.5 (2), 129.6, 133.6, 133.7, 135.6 (2); IR (KBr) ν<sub>max</sub> 3386, 2933, 1738, 1619, 1376, 1225, 1111, 704 cm<sup>-1</sup>; HRMS (ESIMS) calcd for C<sub>34</sub>H<sub>54</sub>O<sub>6</sub>SiNa [M + Na]<sup>+</sup> 609.3582, found 609.3586.

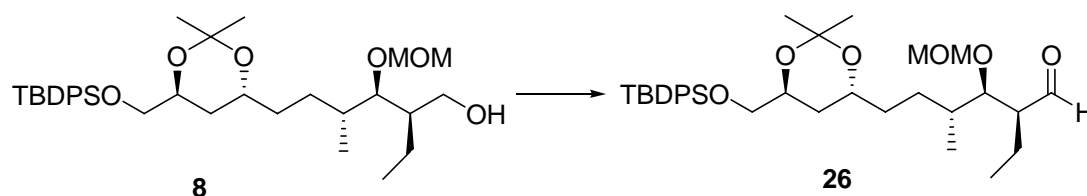

**Aldehyde 26.** To a solution of alcohol **8** (1.149 g, 1.96 mmol) in EtOAc (50 mL) was added IBX (1.647 g, 58.82 mmol). The resulting suspension was heated to reflux in ambient atmosphere. After refluxing for 3 h, the reaction was cooled to rt and filtered through a medium glass frit. The filter cake was washed with Et<sub>2</sub>O (3 × 20 mL) and the combined filtrate was concentrated to dryness. The residue was purified by flash column chromatography (Hexane:EtOAc, 20:1) to give aldehyde **26** (972 mg, 85%) as a colorless liquid: <sup>1</sup>H NMR (300 MHz, CDCl<sub>3</sub>) δ: 0.93 (d, *J* = 6.9 Hz, 3 H), 0.97 (t, *J* = 7.8 Hz, 3 H), 1.06 (s, 9 H), 1.24 (m, 2 H), 1.34 (s, 3 H), 1.35 (s, 3 H), 1.63 (m, 7 H), 2.36 (m, 1 H), 3.32 (s, 3 H), 3.62 (dd, *J* = 10.5 Hz, *J* = 4.5 Hz, 1 H), 3.72 (m, 3 H), 3.95 (m, 1 H), 4.61 (m, 2 H), 7.40 (m, 6 H), 7.69 (m, 4 H), 9.72 (s, 1 H); <sup>13</sup>C NMR (75 MHz, CDCl<sub>3</sub>) δ: 12.7, 16.1, 17.3, 19.2, 24.8 (2), 26.7, 27.7, 33.4, 34.7, 36.2, 55.9, 56.2, 66.6, 66.7, 67.6, 82.0, 97.7, 100.1, 127.5 (2), 129.5, 133.6, 133.7, 135.5, 135.6 (2), 204.2; HRMS (ESIMS) calcd for C<sub>34</sub>H<sub>52</sub>O<sub>6</sub>SiNa [M + Na]<sup>+</sup> 607.3425, found 607.3426.

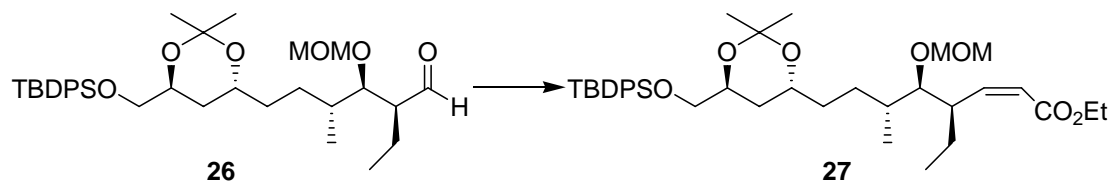

**Enoate 27.** To a suspension of sodium hydride (50% dispersion in mineral oil, 83 mg, 1.73 mmol) in THF (10 mL) was added ethyl (di-*o*-tolylphosphono)acetate (189mg, 0.54 mmol) at 0 °C. After stirring for 10 min, the mixture was cooled to -78 °C followed by addition of aldehyde **26** (215mg, 0.47 mmol) in THF (5 mL). After the mixture was warmed to -10 °C, the resulting mixture was stirred for additional 1 h. The mixture was quenched with saturated NH<sub>4</sub>Cl (20 mL) and diluted with EtOAc (10 mL). The organic layer was separated and the aqueous layer was separated and extracted with EtOAc (3 × 10 mL). The combined organic extracted was washed with saturated NaHCO<sub>3</sub> (2 × 10 mL) and brine (15 mL), dried over Na<sub>2</sub>SO<sub>4</sub>, filtrated and concentrated under reduced pressure. The residue was purified by flash column chromatography (Hexane:EtOAc, 20:1) to afford enoate **27** (715 mg, 70%) as a colorless oil: <sup>1</sup>H NMR (300 MHz, CDCl<sub>3</sub>) δ: 0.84 (t, *J* = 6.9 Hz, 3 H), 0.97 (d, *J* = 6.9 Hz, 3 H), 1.06 (s, 9 H), 1.26 (m, 6 H), 1.34 (s, 6 H), 1.51 (m, 2 H), 1.62 (m, 3 H) 1.78 (m, 1 H), 3.24 (m, 1 H), 3.39 (s, 3 H), 3.61 (dd, *J* = 10.5 Hz, *J* = 4.8 Hz, 1 H), 3.71 (dd, *J* = 10.5 Hz, *J* = 6.3 Hz, 1 H), 3.72 (m, 2 H), 3.94 (m, 1 H), 4.15 (q, *J* = 6.9 Hz, 2 H), 4.63 (s, 2 H), 5.84 (d, *J* = 11.7 Hz, 1 H), 6.03 (m, 1 H), 7.39 (m, 6 H), 7.70 (m, 4 H); <sup>13</sup>C NMR (75 MHz, CDCl<sub>3</sub>) δ: 11.7, 14.2, 16.5, 19.2, 22.4, 24.8, 26.7, 27.4, 33.8, 34.7, 36.4, 42.0, 56.0, 59.7, 66.7, 66.9, 67.6, 86.9, 98.3, 100.0, 120.5, 127.5 (2), 129.5, 133.6, 133.8, 135.6 (2), 152.0, 166.1; HRMS (ESIMS) calcd for C<sub>38</sub>H<sub>58</sub>O<sub>7</sub>SiNa [M + Na]<sup>+</sup> 677.3844, found 609.3848.

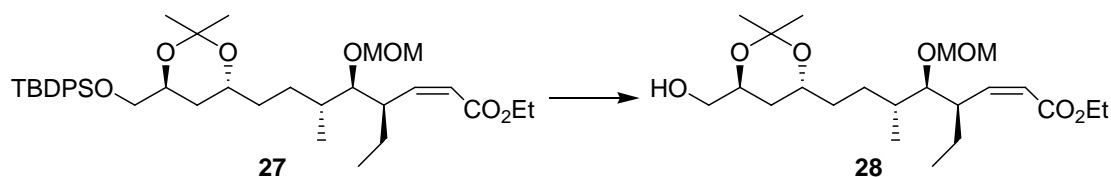

**Enoate Alcohol 28.** To a solution of enoate **27** (661 mg, 1.01 mmol) in THF (10 mL) was added TBAF (638 mg, 2.02 mmol) and the mixture was stirred for 12 h. Water (10 mL) was added and the aqueous layer was extracted with EtOAc (3 × 10 mL). The combined organic layers was dried over Na<sub>2</sub>SO<sub>4</sub>, filtered and concentrated under reduced pressure. The residue was purified by flash column chromatography (Hexanes:EtOAc, 4:1) to provide enoate alcohol **28** (378 mg, 90%) as a



colorless oil:  $^1\text{H}$  NMR (300 MHz,  $\text{CDCl}_3$ )  $\delta$ : 0.80 (t,  $J = 7.5$  Hz, 3 H), 0.93 (d,  $J = 6.9$  Hz, 3 H), 1.22 (m, 3 H), 1.25 (t,  $J = 7.2$  Hz, 3 H), 1.32 (s, 3 H), 1.33 (s, 3 H), 1.45 (m, 2 H), 1.59 (m, 3 H), 1.74 (m, 1 H), 2.19 (brs, 1 H), 3.20 (dd,  $J = 10.5$  Hz, 5.4 Hz, 1 H), 3.36 (s, 3 H), 3.49 (m, 1 H), 3.55 (m, 1 H), 3.68 (m, 2 H), 3.90 (m, 1 H), 4.12 (q,  $J = 7.2$  Hz, 2 H), 4.60 (s, 2 H), 5.81 (d,  $J = 11.7$  Hz, 1 H), 5.98 (m, 1 H);  $^{13}\text{C}$  NMR (75 MHz,  $\text{CDCl}_3$ )  $\delta$ : 11.6, 14.2, 16.6, 22.5, 24.7, 24.8, 27.1, 33.8 (2), 36.4, 42.0, 56.0, 59.8, 65.4, 66.9, 67.5, 87.0, 98.4, 100.3, 120.5, 151.8, 166.2; HRMS (ESIMS) calcd for  $\text{C}_{22}\text{H}_{40}\text{O}_7\text{Na}$   $[\text{M} + \text{Na}]^+$  439.2666, found 439.2657.

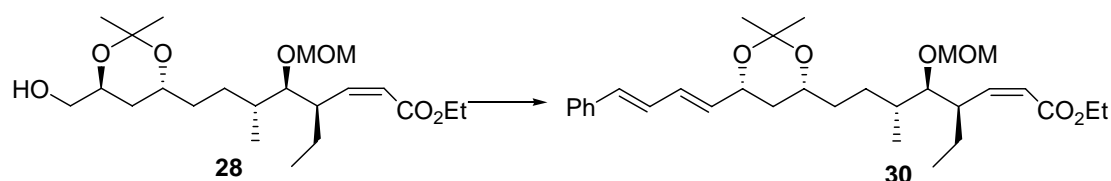

**Enoate 30.** To a solution of enoate alcohol **28** (40 mg, 0.096 mmol) in  $\text{CH}_2\text{Cl}_2$  (5 mL) was added Dess–Martin periodinane (122 mg, 0.288 mmol). The reaction mixture was stirred at rt for 4 h followed by addition of saturated  $\text{NaHCO}_3$  (2 mL) and  $\text{Na}_2\text{S}_2\text{O}_3$  (2 mL). After the solids were dissolved, the mixture was extracted with  $\text{Et}_2\text{O}$  ( $3 \times 10$  mL). The combined organic layers were washed with water (5 mL), brine (5 mL), dried over  $\text{Na}_2\text{SO}_4$ , filtered and concentrated under reduced pressure. The crude product was directly used for further transformation without purification. Compound **29** (49 mg, 0.192 mmol),  $\text{LiOH}$  (7 mg, 0.291 mmol), 4 Å molecular sieves (127 mg) and crude aldehyde were mixed in THF (5 mL). The mixture was refluxed for 10 h and then filtered through silica gel. The filtrate was concentrated to dryness and the residue was purified by flash column chromatography (Hexane:EtOAc, 30:1) to give enoate **30** (20 mg, 40% for two steps) as a colorless oil:  $^1\text{H}$  NMR (400 MHz,  $\text{CDCl}_3$ ):  $\delta$  0.84 (t,  $J = 7.2$  Hz, 3 H), 0.97 (d,  $J = 6.8$  Hz, 3 H), 1.28 (m, 7 H), 1.43 (s, 3 H), 1.48 (s, 3 H), 1.62 (m, 4 H), 1.79 (m, 1 H), 3.24 (m, 1 H), 3.40 (s, 3 H), 3.72 (m, 1 H), 3.82 (m, 1 H), 4.15 (q,  $J = 7.2$  Hz, 2 H), 4.44 (m, 1 H), 4.64 (s, 2 H), 5.76 (dd,  $J = 15.2$  Hz,  $J = 6.0$  Hz, 1 H), 5.85 (d,  $J = 12.0$  Hz, 1 H), 6.00 (t,  $J = 11.2$  Hz, 1 H), 6.41 (dd,  $J = 15.2$  Hz,  $J = 10.8$  Hz, 1 H), 6.54 (d,  $J = 15.2$  Hz, 1 H), 6.74 (dd,  $J = 16.0$  Hz,  $J = 10.8$  Hz, 1 H), 7.22 (t,  $J = 7.6$  Hz, 1 H), 7.31 (t,  $J = 8.0$  Hz, 2 H), 7.40 (d,  $J = 7.6$  Hz, 2 H);  $^{13}\text{C}$  NMR (100 MHz,  $\text{CDCl}_3$ )  $\delta$  11.6, 14.3, 16.8, 19.8, 22.8, 26.7, 30.3, 34.4, 36.5, 37.1, 42.2, 56.1, 59.8, 69.1, 39.8, 87.0, 98.5, 98.6, 120.6, 126.3, 127.5, 128.4, 128.6, 130.8, 132.7, 134.2, 137.2, 151.7, 166.2; HRMS (ESIMS) calcd for  $\text{C}_{31}\text{H}_{46}\text{O}_6\text{Na}$   $[\text{M} + \text{Na}]^+$  537.3187, found 537.3185.

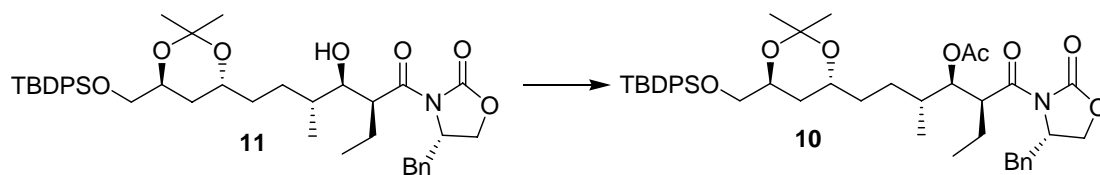

**Imide Acetate 10.** To a solution of imide alcohol **11** (1.282 g, 1.79 mmol) in CH<sub>2</sub>Cl<sub>2</sub> (45 mL) was added Et<sub>3</sub>N (1 mL, 7.16 mmol), Ac<sub>2</sub>O (0.34 mL, 3.58 mmol) and N,N-4-dimethylaminopyridine (22 mg, 0.18 mmol). The mixture was stirred at rt for 4 h followed by addition of saturated NaHCO<sub>3</sub> (aq.). The organic layer was separated and the aqueous layer extracted with CH<sub>2</sub>Cl<sub>2</sub> (3 × 20 mL). The combined organic layers was washed with brine (10 mL), dried over Na<sub>2</sub>SO<sub>4</sub>, filtered and concentrated under reduced pressure. The residue was purified by flash column chromatography (Hexanes:EtOAc, 6:1) to provide imide acetate **10** (1.292g, 95%) as a viscous colorless oil:  $[\alpha]_D^{20} = +17.8$  ( $c = 3.30$ , CHCl<sub>3</sub>); <sup>1</sup>H NMR (300 MHz, CDCl<sub>3</sub>):  $\delta$  0.94 (d,  $J = 6.9$  Hz, 3 H), 0.97 (t,  $J = 7.8$  Hz, 3 H), 1.06 (s, 9 H), 1.30 (m, 2 H), 1.32 (s, 3 H), 1.33 (s, 3 H), 1.56 (m, 5 H), 1.79 (m, 1 H), 1.93 (m, 1 H), 2.03 (s, 3 H), 2.79 (dd,  $J = 12.9$  Hz,  $J = 9.9$  Hz, 1 H), 3.27 (dd,  $J = 12.9$  Hz,  $J = 3.0$  Hz, 1 H), 3.61 (dd,  $J = 10.5$  Hz,  $J = 4.8$  Hz, 1 H), 3.71 (dd,  $J = 10.5$  Hz,  $J = 5.7$  Hz, 1 H), 3.72 (m, 1 H), 3.92 (m, 1 H), 4.08 (m, 1 H), 4.13 (m, 1 H), 4.25 (m, 1 H), 4.55 (m, 1 H), 4.95 (dd,  $J = 9.3$  Hz,  $J = 2.4$  Hz, 1 H), 7.26 (m, 2 H), 7.40 (m, 9 H), 7.69 (m, 4 H); <sup>13</sup>C NMR (75 MHz, CDCl<sub>3</sub>)  $\delta$  12.1, 15.0, 17.1, 19.2, 20.7, 24.9, 26.8, 28.2, 32.8, 34.3, 34.5, 38.1, 46.4, 55.8, 66.3, 66.4, 66.7, 67.6, 100.0, 127.2, 127.5, 128.8, 129.4, 129.5, 133.6, 133.7, 135.4, 135.6 (2), 153.6, 171.0, 173.4; IR(KBr)  $\nu_{\max}$  2934, 1780, 1736, 1699, 1382, 1230, 1110, 1020, 703 cm<sup>-1</sup>; HRMS (ESIMS) calcd for C<sub>44</sub>H<sub>59</sub>NO<sub>8</sub>SiNa [M + Na]<sup>+</sup> 780.3902, found 780.3907.

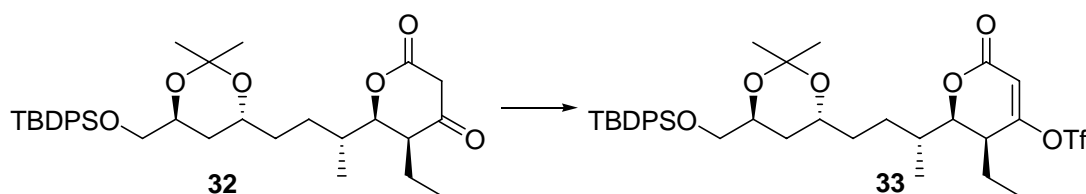

**Triflate 33.** To a solution of  $\beta$ -keto lactone **32** (918 mg, 1.58 mmol) in CH<sub>2</sub>Cl<sub>2</sub> (50 mL) was added Et<sub>3</sub>N (0.7 mL, 4.75mmol) at -78 °C and the mixture was stirred for 10 min. Triflic anhydride (0.3 mL, 1.74 mmol) was added within 0.5 min followed by stirring for additional 30 min. The reaction was quenched with saturated NaHCO<sub>3</sub> (20 mL) and the mixture was extracted with CH<sub>2</sub>Cl<sub>2</sub> (3 × 30 mL). The combined organic layers was dried over Na<sub>2</sub>SO<sub>4</sub>, filtered and concentrated under reduced pressure. The residue was purified by flash column chromatography (Hexanes:EtOAc,

10:1) to provide triflate **32** (1.043 g, 93%) as a colorless oil:  $[\alpha]_D^{20}$  -63.3 ( $c = 4.10$ ,  $\text{CHCl}_3$ );  $^1\text{H}$  NMR (400 MHz,  $\text{CDCl}_3$ ):  $\delta$  0.95 (d,  $J = 6.8$  Hz, 3 H), 1.04 (t,  $J = 7.6$  Hz, 3 H), 1.09 (s, 9 H), 1.29 (m, 1 H), 1.36 (s, 3 H), 1.37 (s, 3 H), 1.43 (m, 1 H), 1.55 (m, 1 H), 1.72 (m, 4 H), 1.90 (m, 2 H), 2.57 (m, 1 H), 3.65 (dd,  $J = 10.8$  Hz,  $J = 4.8$  Hz, 1 H), 3.74 (dd,  $J = 10.8$  Hz,  $J = 6.4$  Hz, 1 H), 3.77 (m, 1 H), 3.97 (m, 1 H), 4.13 (dd,  $J = 10.4$  Hz,  $J = 2.8$  Hz, 1 H), 6.11 (s, 1 H), 7.43 (m, 6 H), 7.72 (m, 4 H);  $^{13}\text{C}$  NMR (100 MHz,  $\text{CDCl}_3$ )  $\delta$  10.7, 14.5, 19.2 (2), 24.8, 24.9, 26.8, 28.2, 32.7, 33.3, 34.7, 40.7, 66.6, 66.7, 67.6, 83.7, 100.1, 109.1, 118.3 (q,  $J = 319$  Hz, C-F), 127.5 (2), 129.5 (2), 133.7, 133.8, 135.6 (2), 163.1, 167.0; IR(KBr)  $\nu_{\text{max}}$  2930, 2858, 1736, 1655, 1562, 1428, 1221, 1137, 1110, 704  $\text{cm}^{-1}$ ; HRMS (ESIMS) calcd for  $\text{C}_{35}\text{H}_{47}\text{F}_3\text{O}_8\text{SSiNa}$   $[\text{M} + \text{Na}]^+$  735.2605, found 735.2607.

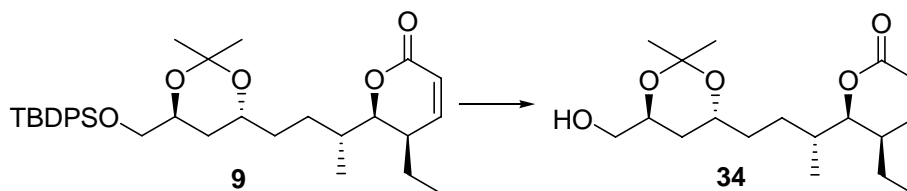

**Alcohol 34.** To a solution of  $\delta$ -lactone **9** (108 mg, 0.191 mmol) in  $\text{CH}_3\text{CN}$  (5 mL) was added  $\text{Et}_3\text{N}$  (0.8 mL, 5.73 mmol) and  $\text{Et}_3\text{N}\cdot 3\text{HF}$  (0.62 mL, 3.82 mmol). This mixture was heated at 45  $^\circ\text{C}$  for 4 h followed by addition of  $\text{Et}_3\text{N}$  (2 mL). The mixture was concentrated to dryness. The residue was diluted with EtOAc (10 mL),  $\text{Et}_3\text{N}$  (2 mL), saturated  $\text{NaHCO}_3$  (10 mL). After stirring for 5 min, the organic layer was separated and the aqueous layer was extracted with EtOAc ( $3 \times 10$  mL). The combined organic extracts was dried over  $\text{Na}_2\text{SO}_4$ , filtered and concentrated under reduced pressure. The residue was purified by flash column chromatography (Hexane:EtOAc, 1.5:1) to afford alcohol **34** (61 mg, 97%) as a colorless oil:  $[\alpha]_D^{20}$  -78 ( $c = 1.40$ ,  $\text{CHCl}_3$ );  $^1\text{H}$  NMR (400 MHz,  $(\text{CD}_3)_2\text{CO}$ ):  $\delta$  0.93 (d,  $J = 6.8$  Hz, 3 H), 0.94 (t,  $J = 7.2$  Hz, 3 H), 1.25 (m, 1 H), 1.28 (s, 6 H), 1.43 (m, 2 H), 1.52 (m, 1 H), 1.63 (m, 1 H), 1.68 (m, 2 H), 1.86 (m, 2 H), 2.47 (m, 1 H), 3.47 (m, 2 H), 3.53 (m, 1 H), 3.77 (m, 1 H), 3.87 (m, 1 H), 4.03 (dd,  $J = 10.0$  Hz,  $J = 2.8$  Hz, 1 H), 5.96 (d,  $J = 9.6$  Hz, 1 H), 7.21 (dd,  $J = 9.6$  Hz,  $J = 6.4$  Hz, 1 H);  $^{13}\text{C}$  NMR (100 MHz,  $(\text{CD}_3)_2\text{CO}$ )  $\delta$  11.2, 15.0, 20.9, 25.4 (2), 29.1, 33.7, 34.5, 35.3, 37.3, 65.9, 67.5, 68.8, 85.0, 100.6, 121.4, 152.3, 164.7; IR(KBr)  $\nu_{\text{max}}$  3452, 2964, 2935, 2876, 1723, 1625, 1462, 1381, 1252, 1225, 1061, 1019  $\text{cm}^{-1}$ ; HRMS (ESIMS) calcd for  $\text{C}_{18}\text{H}_{30}\text{O}_5\text{Na}$   $[\text{M} + \text{Na}]^+$  349.1985, found 349.1992.

## 2. Spectra ( $^1\text{H}$ and $^{13}\text{C}$ NMR) of compounds

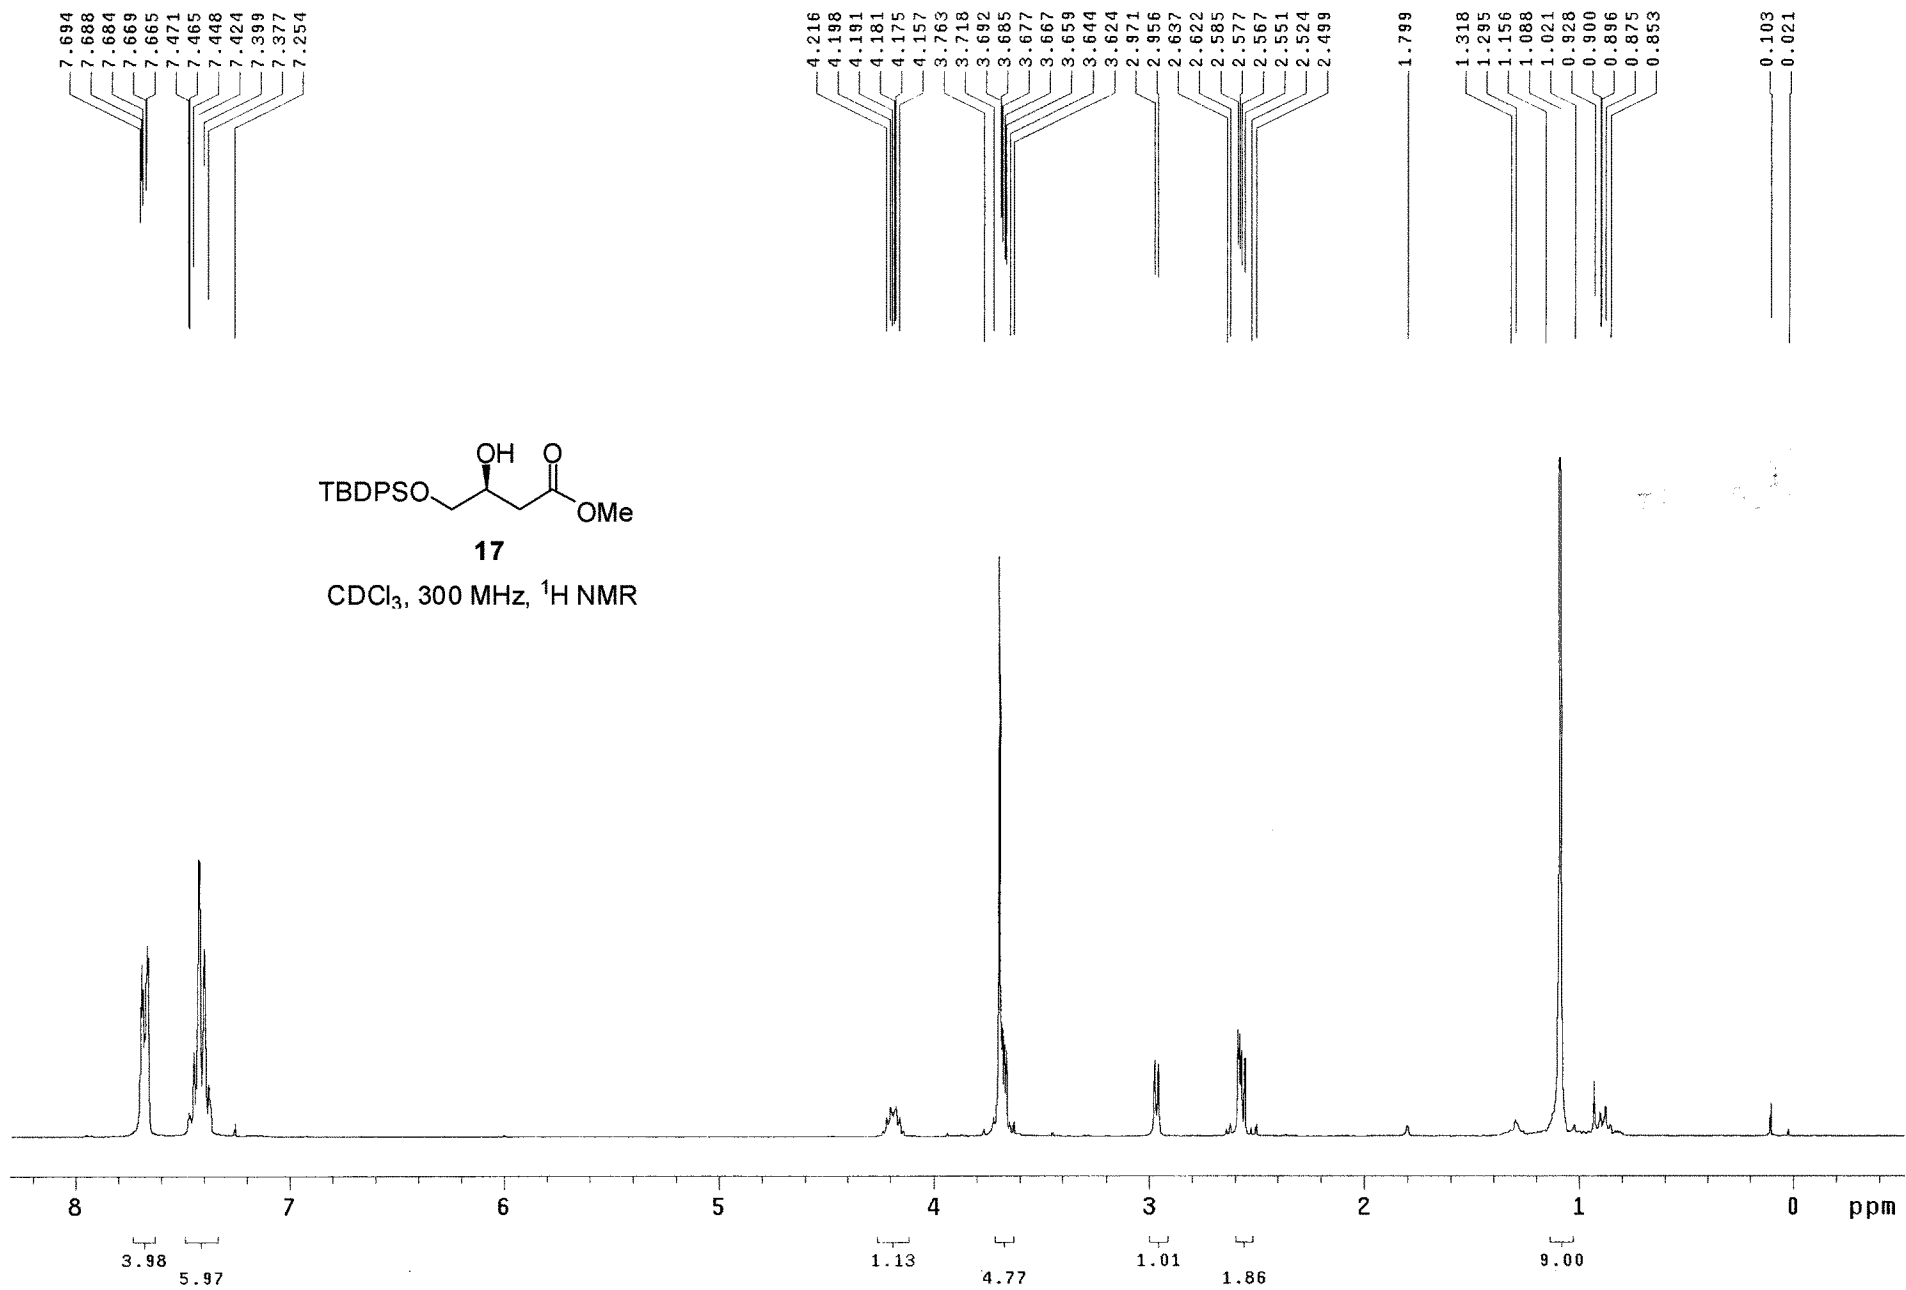

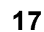

17

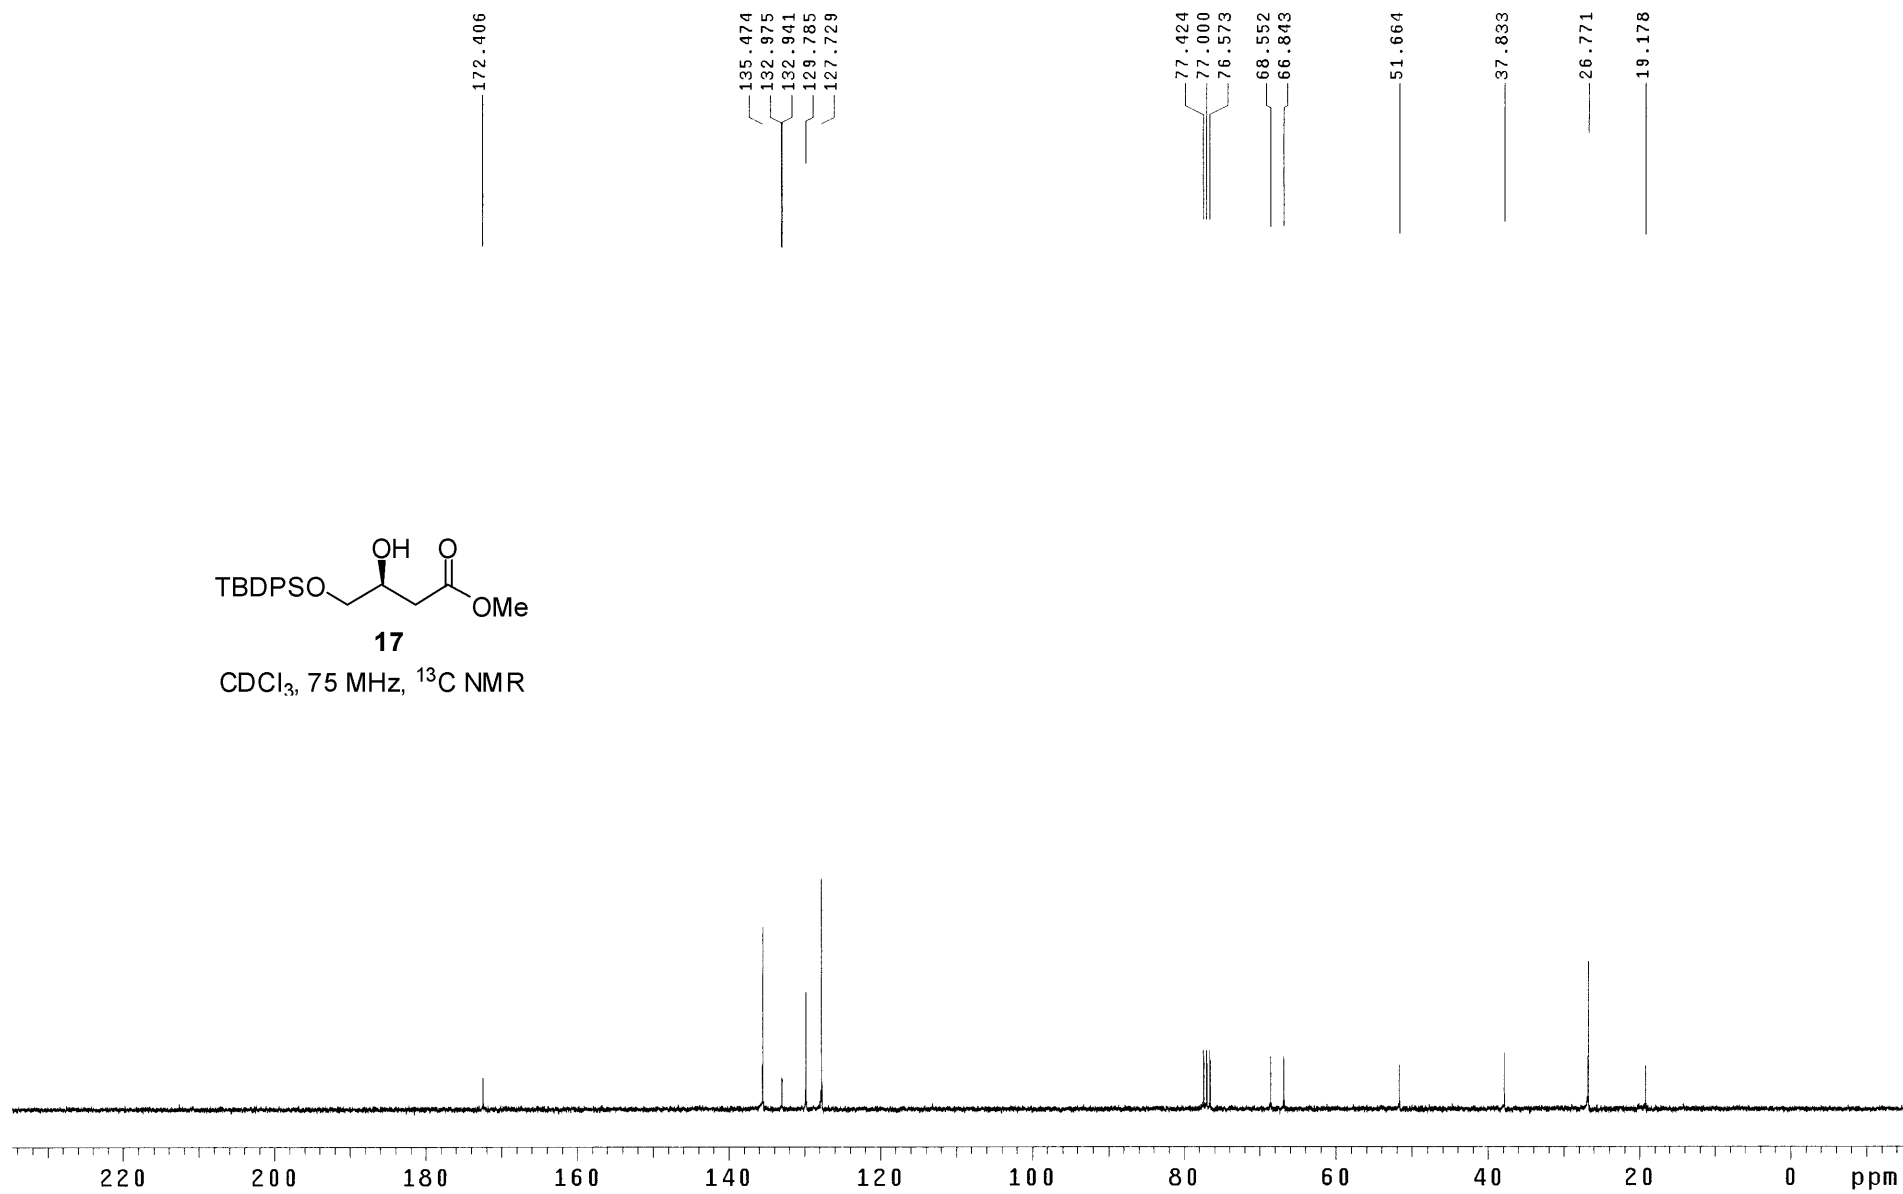

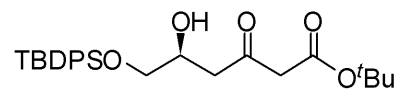

**14**

CDCl<sub>3</sub>, 300 MHz, <sup>1</sup>H NMR

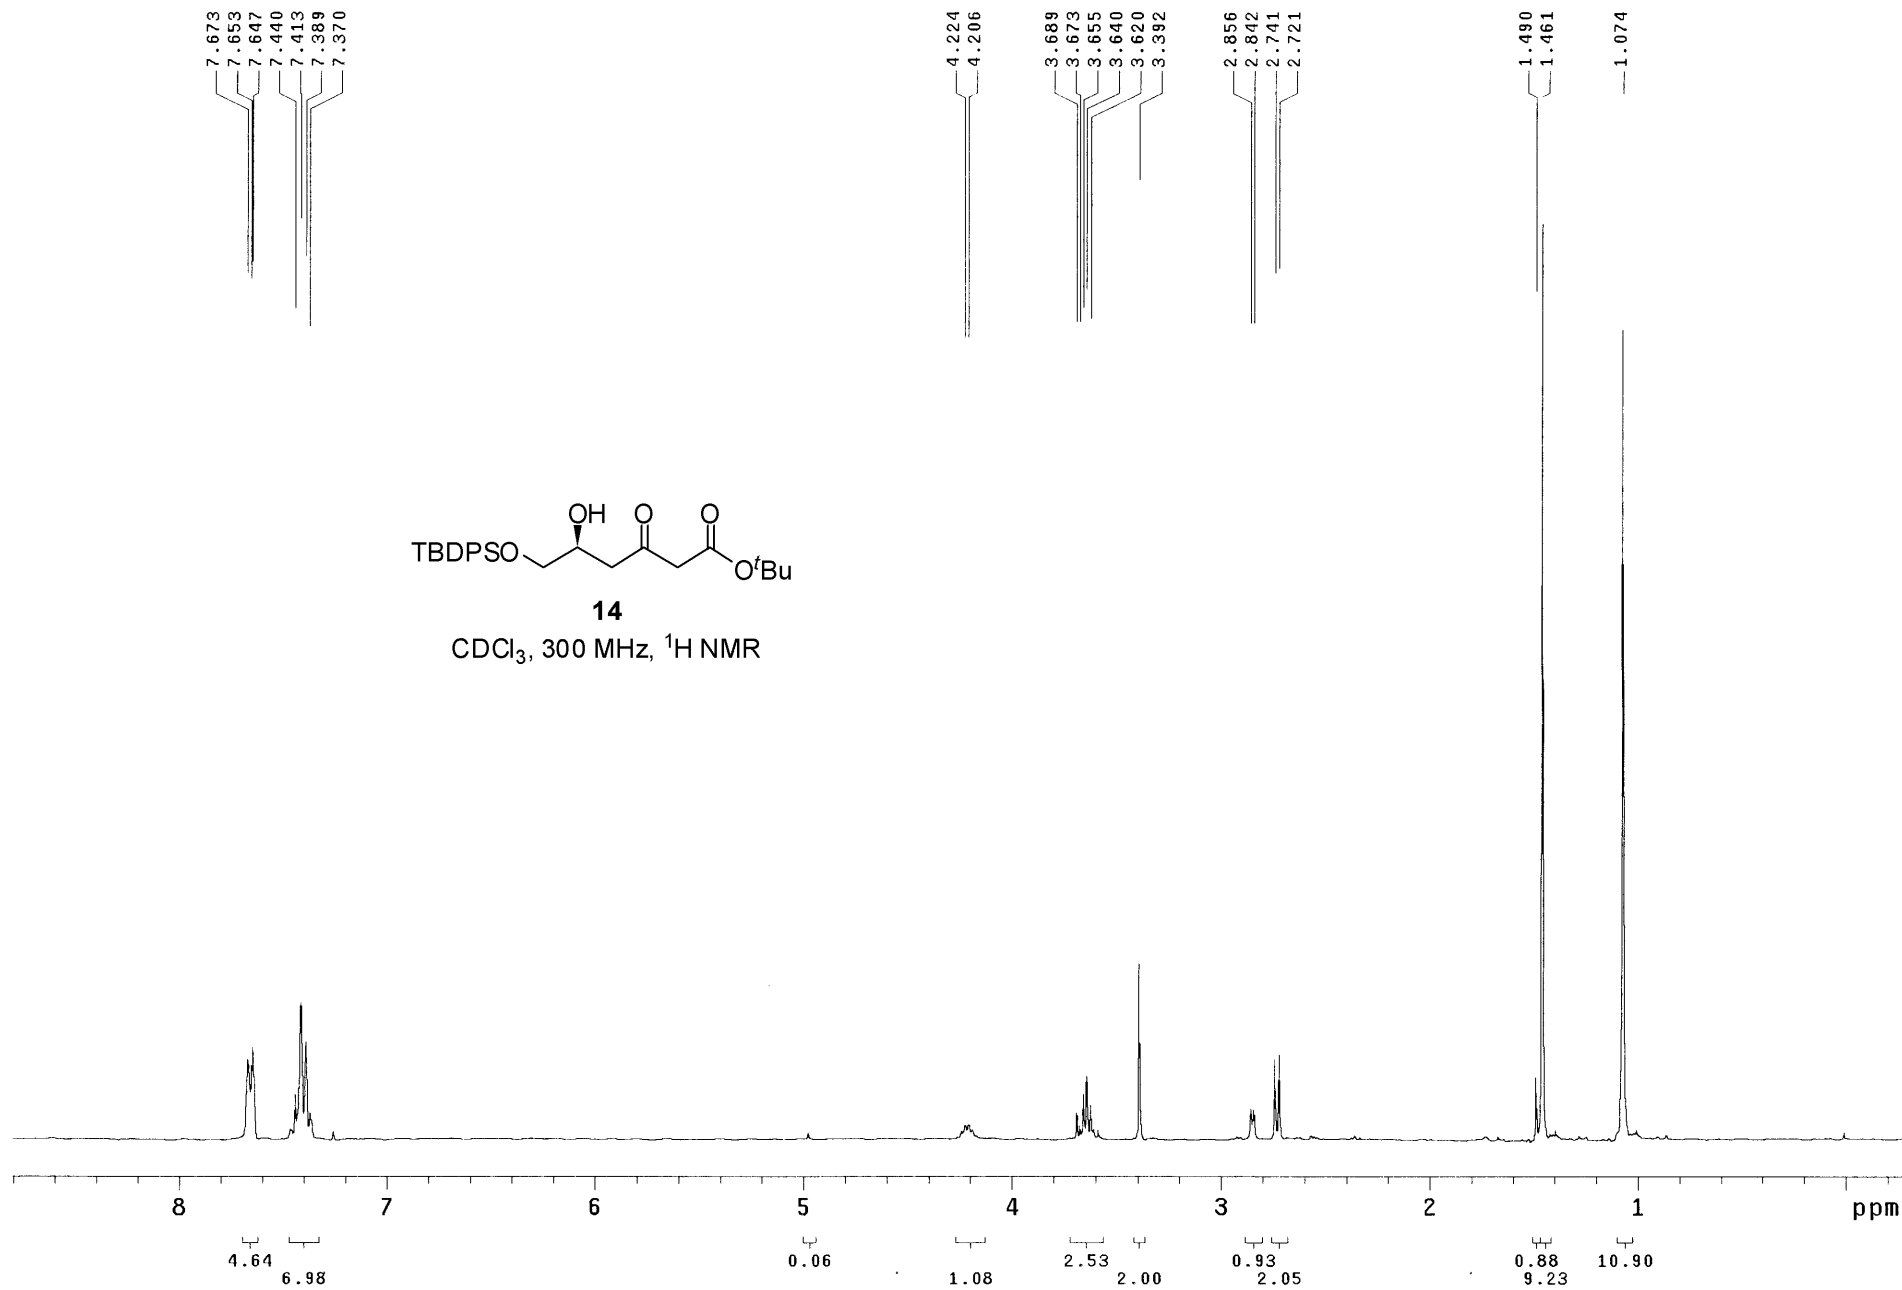

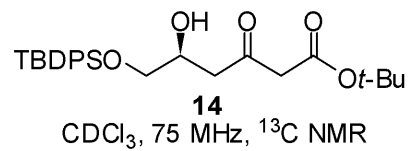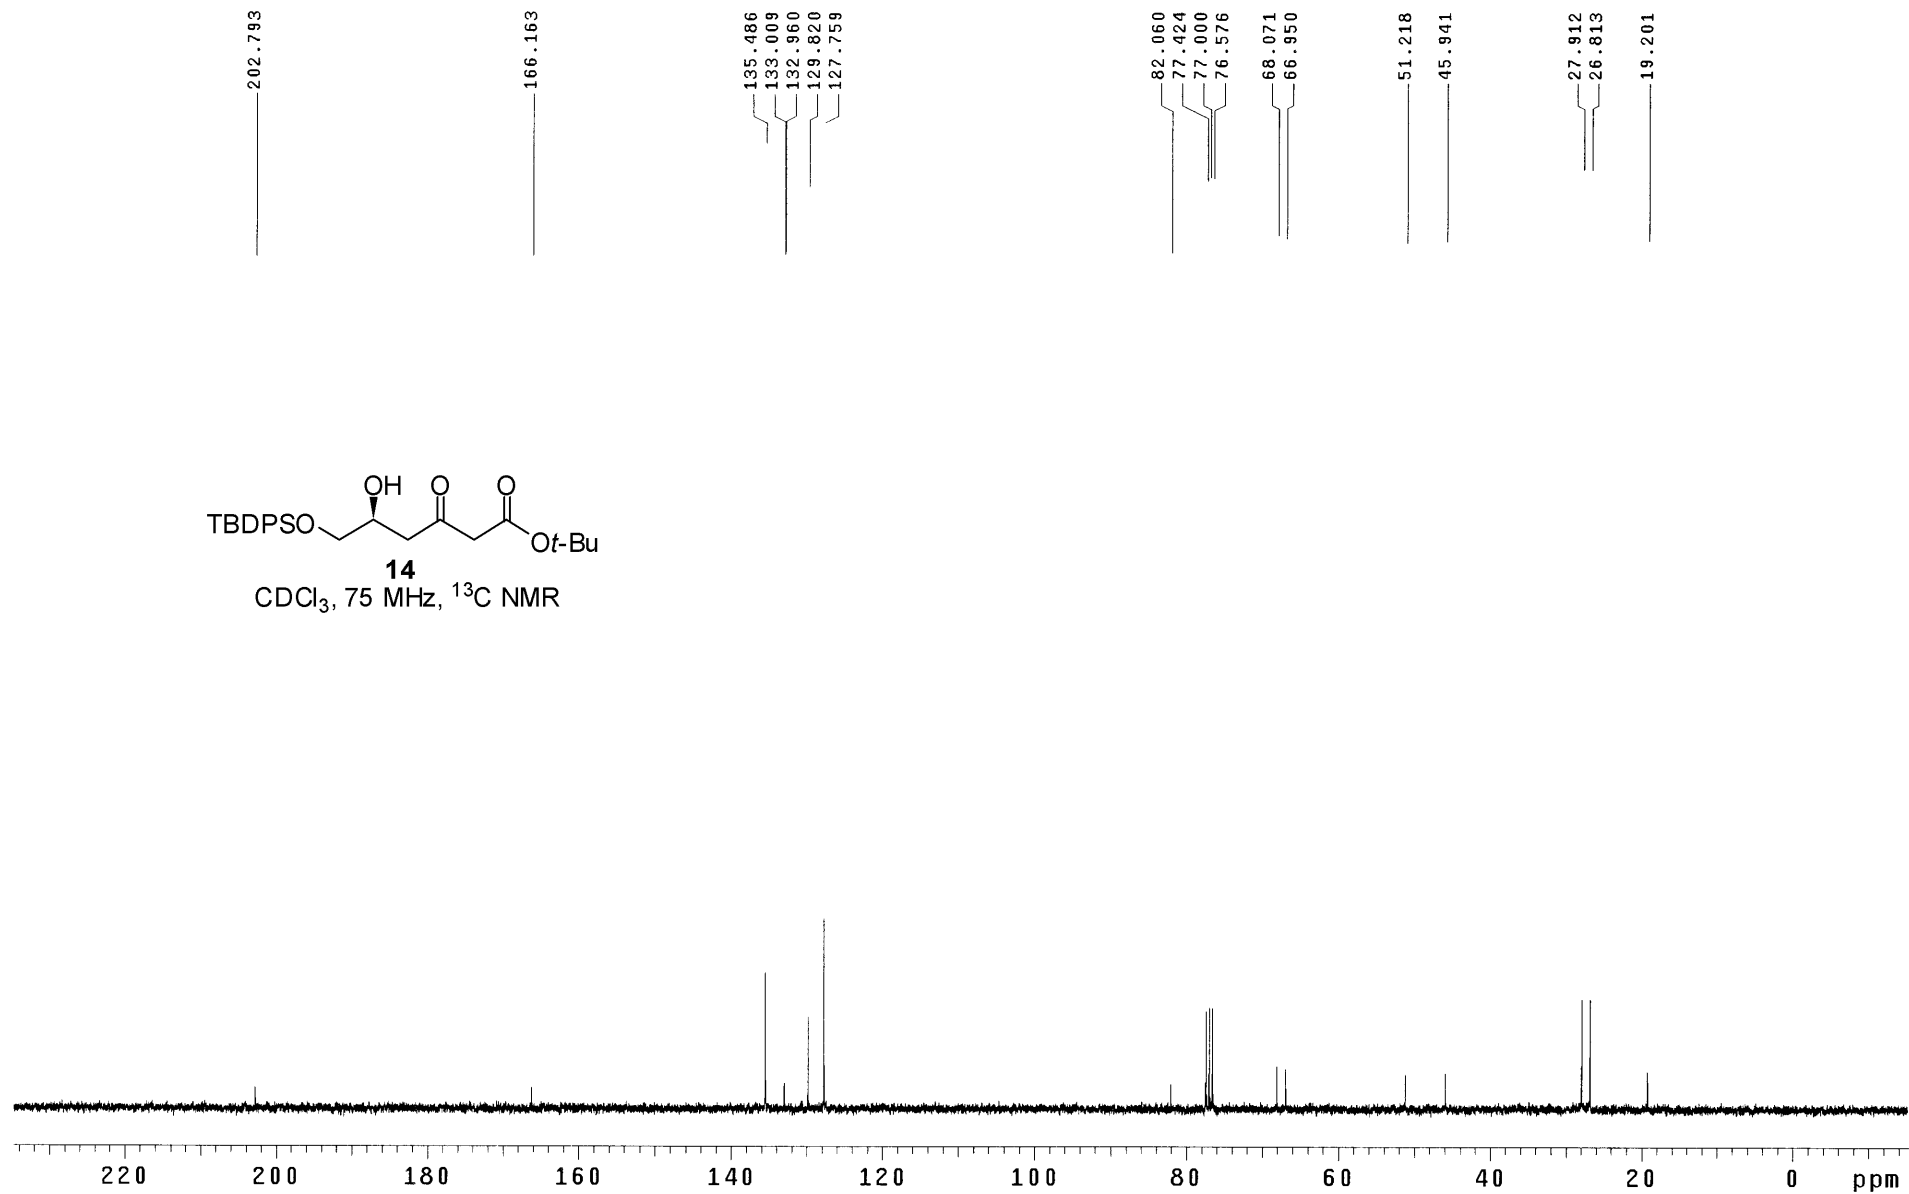

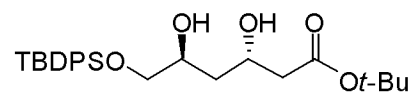

CDCl<sub>3</sub>, 400 MHz, <sup>1</sup>H NMR

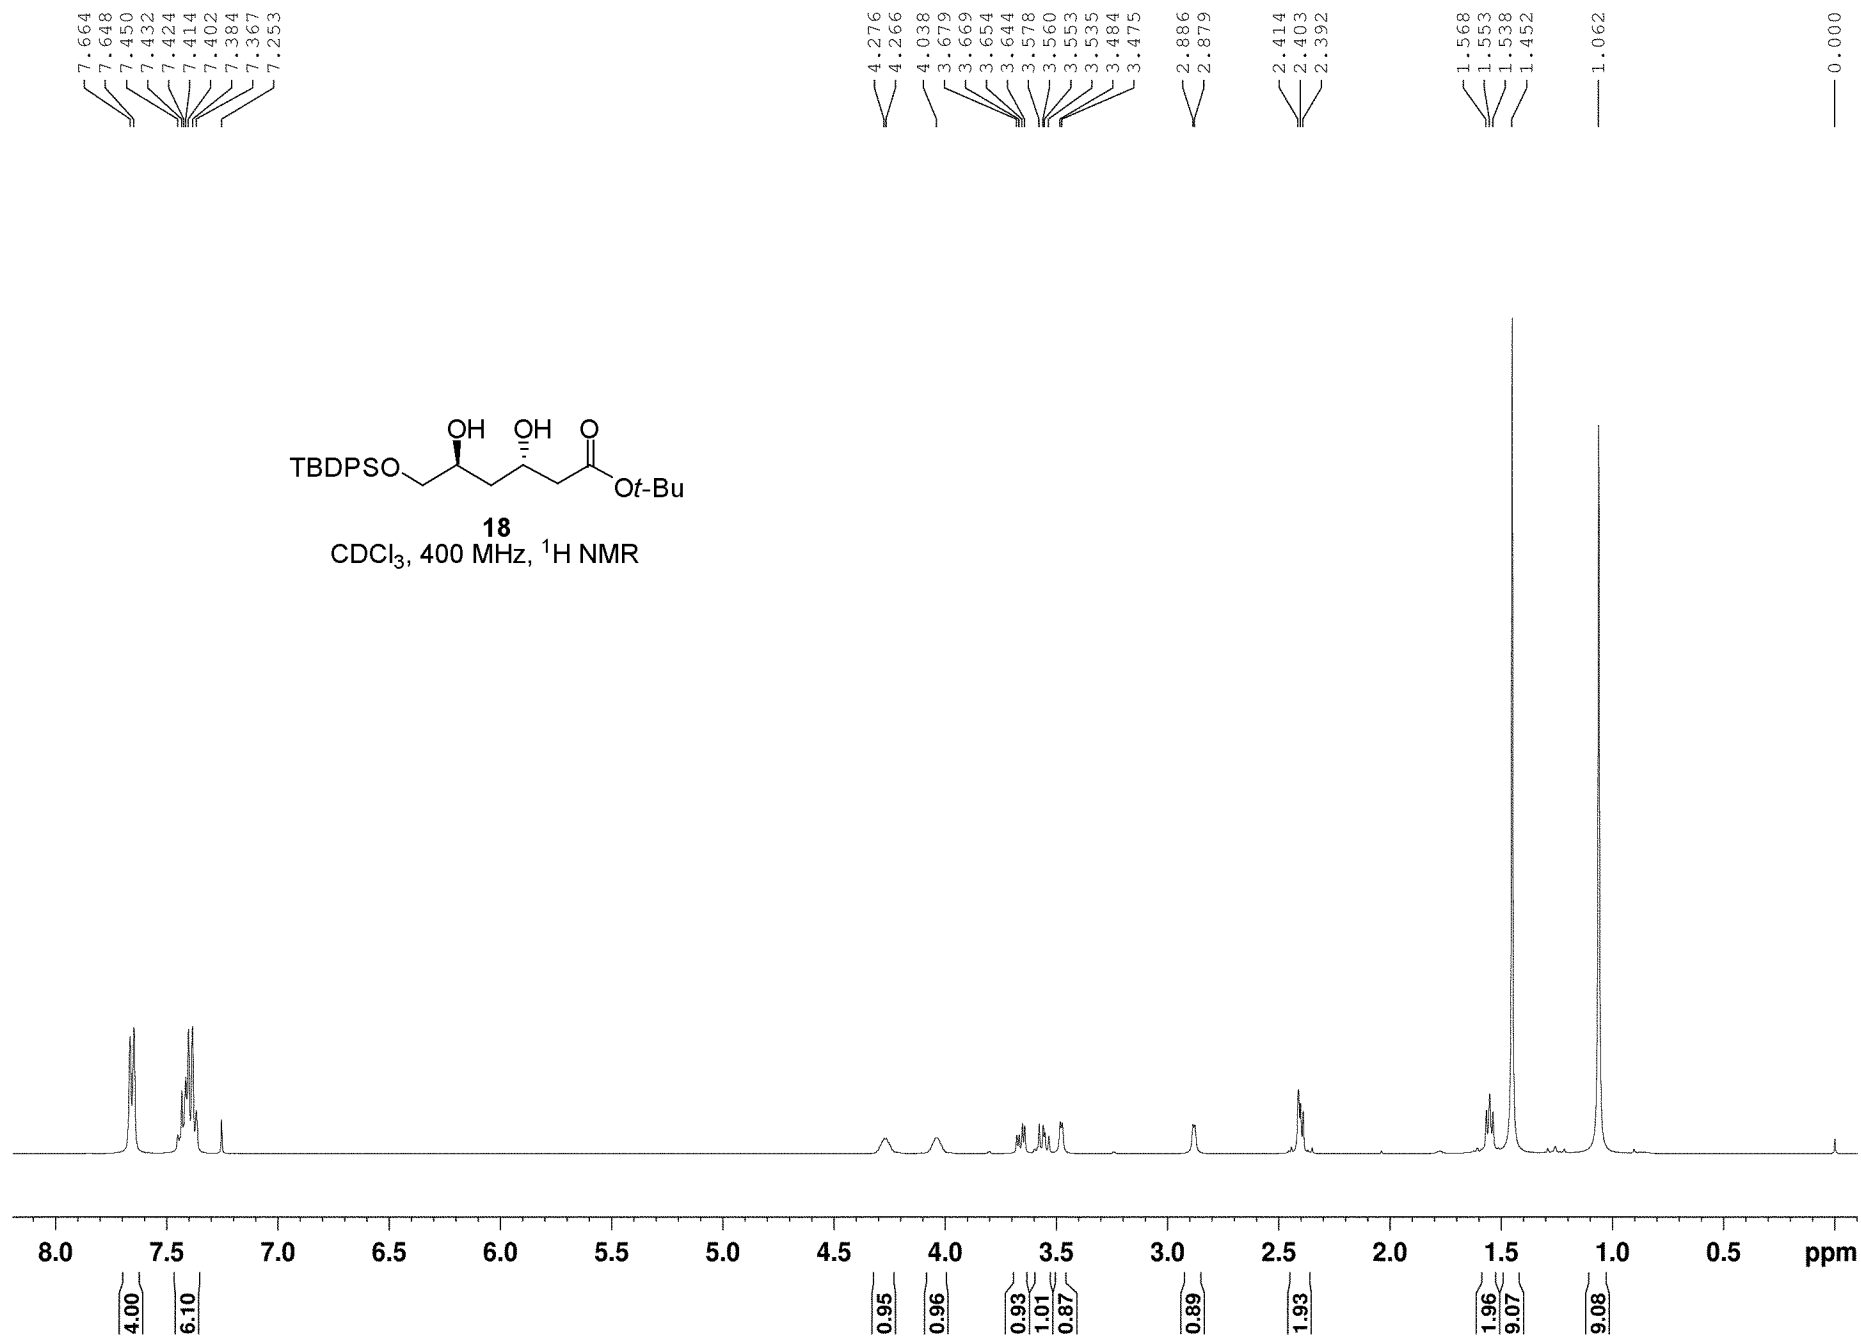



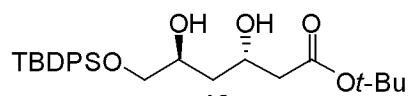

CDCl<sub>3</sub>, 100 MHz, <sup>13</sup>C NMR

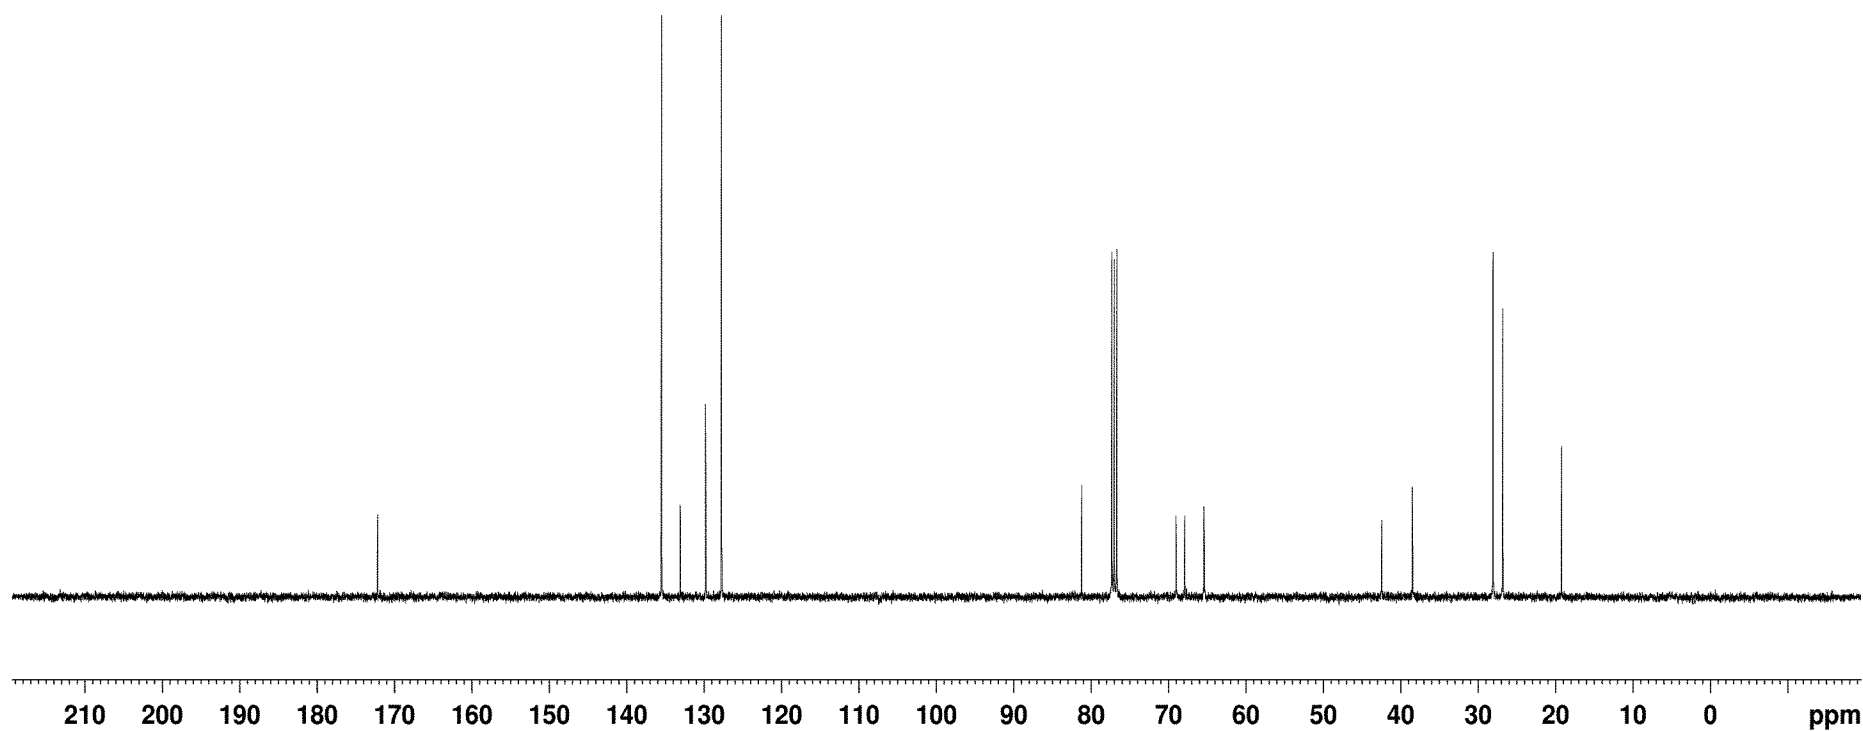

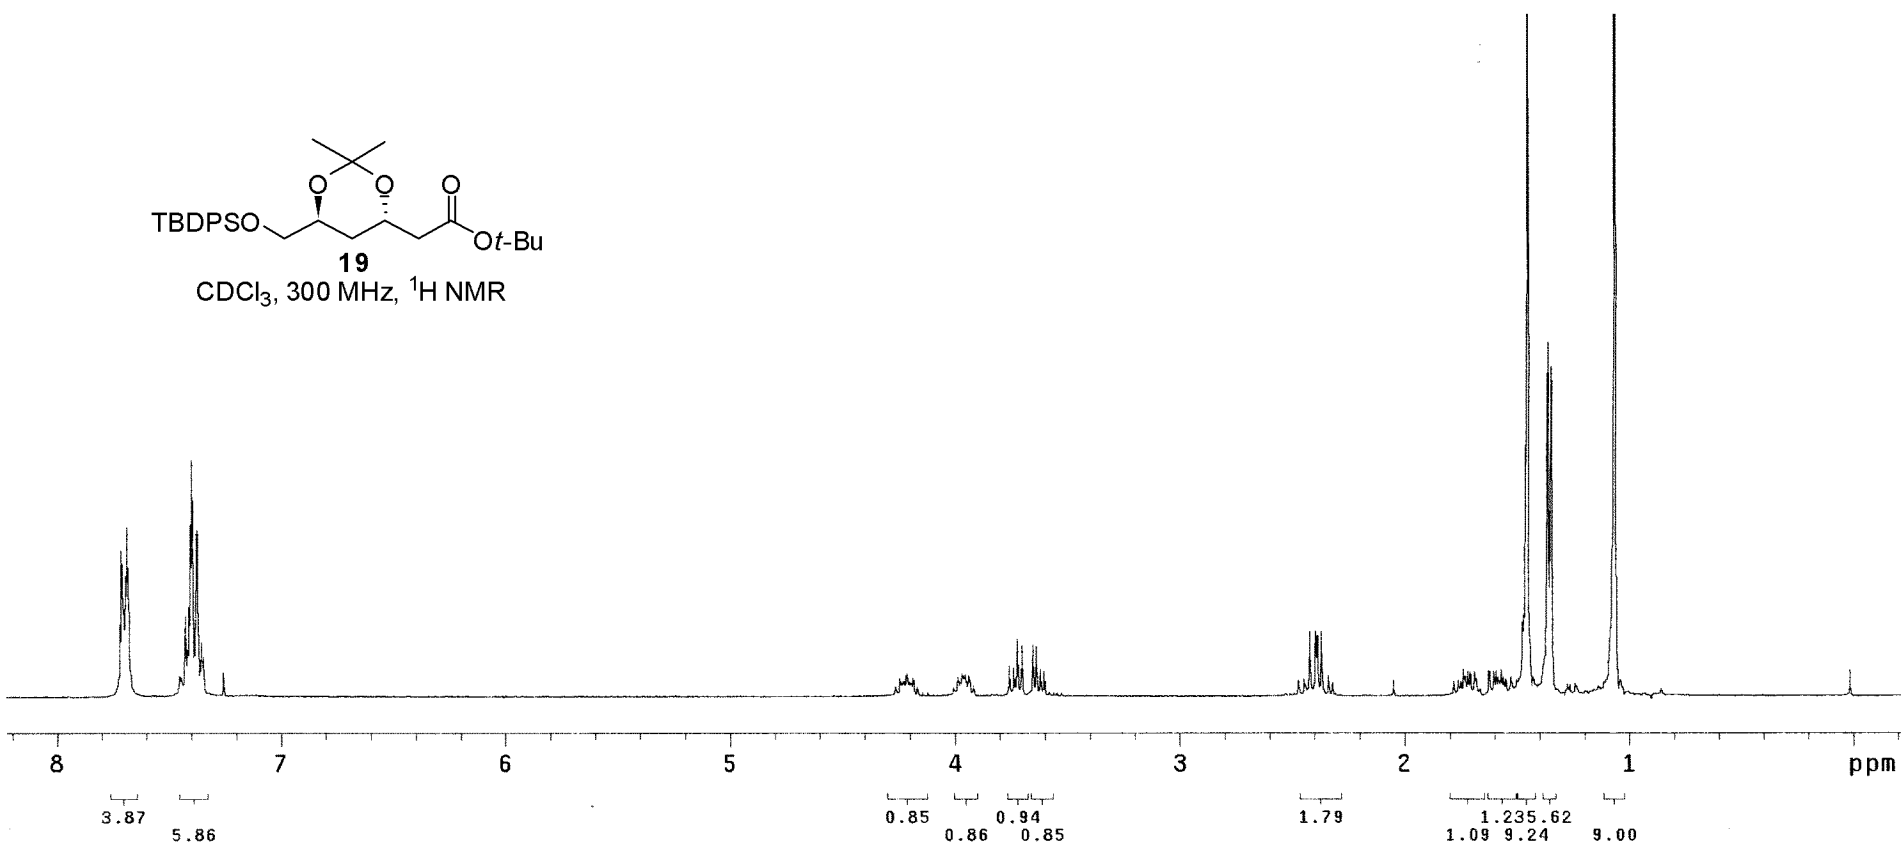

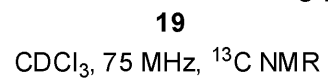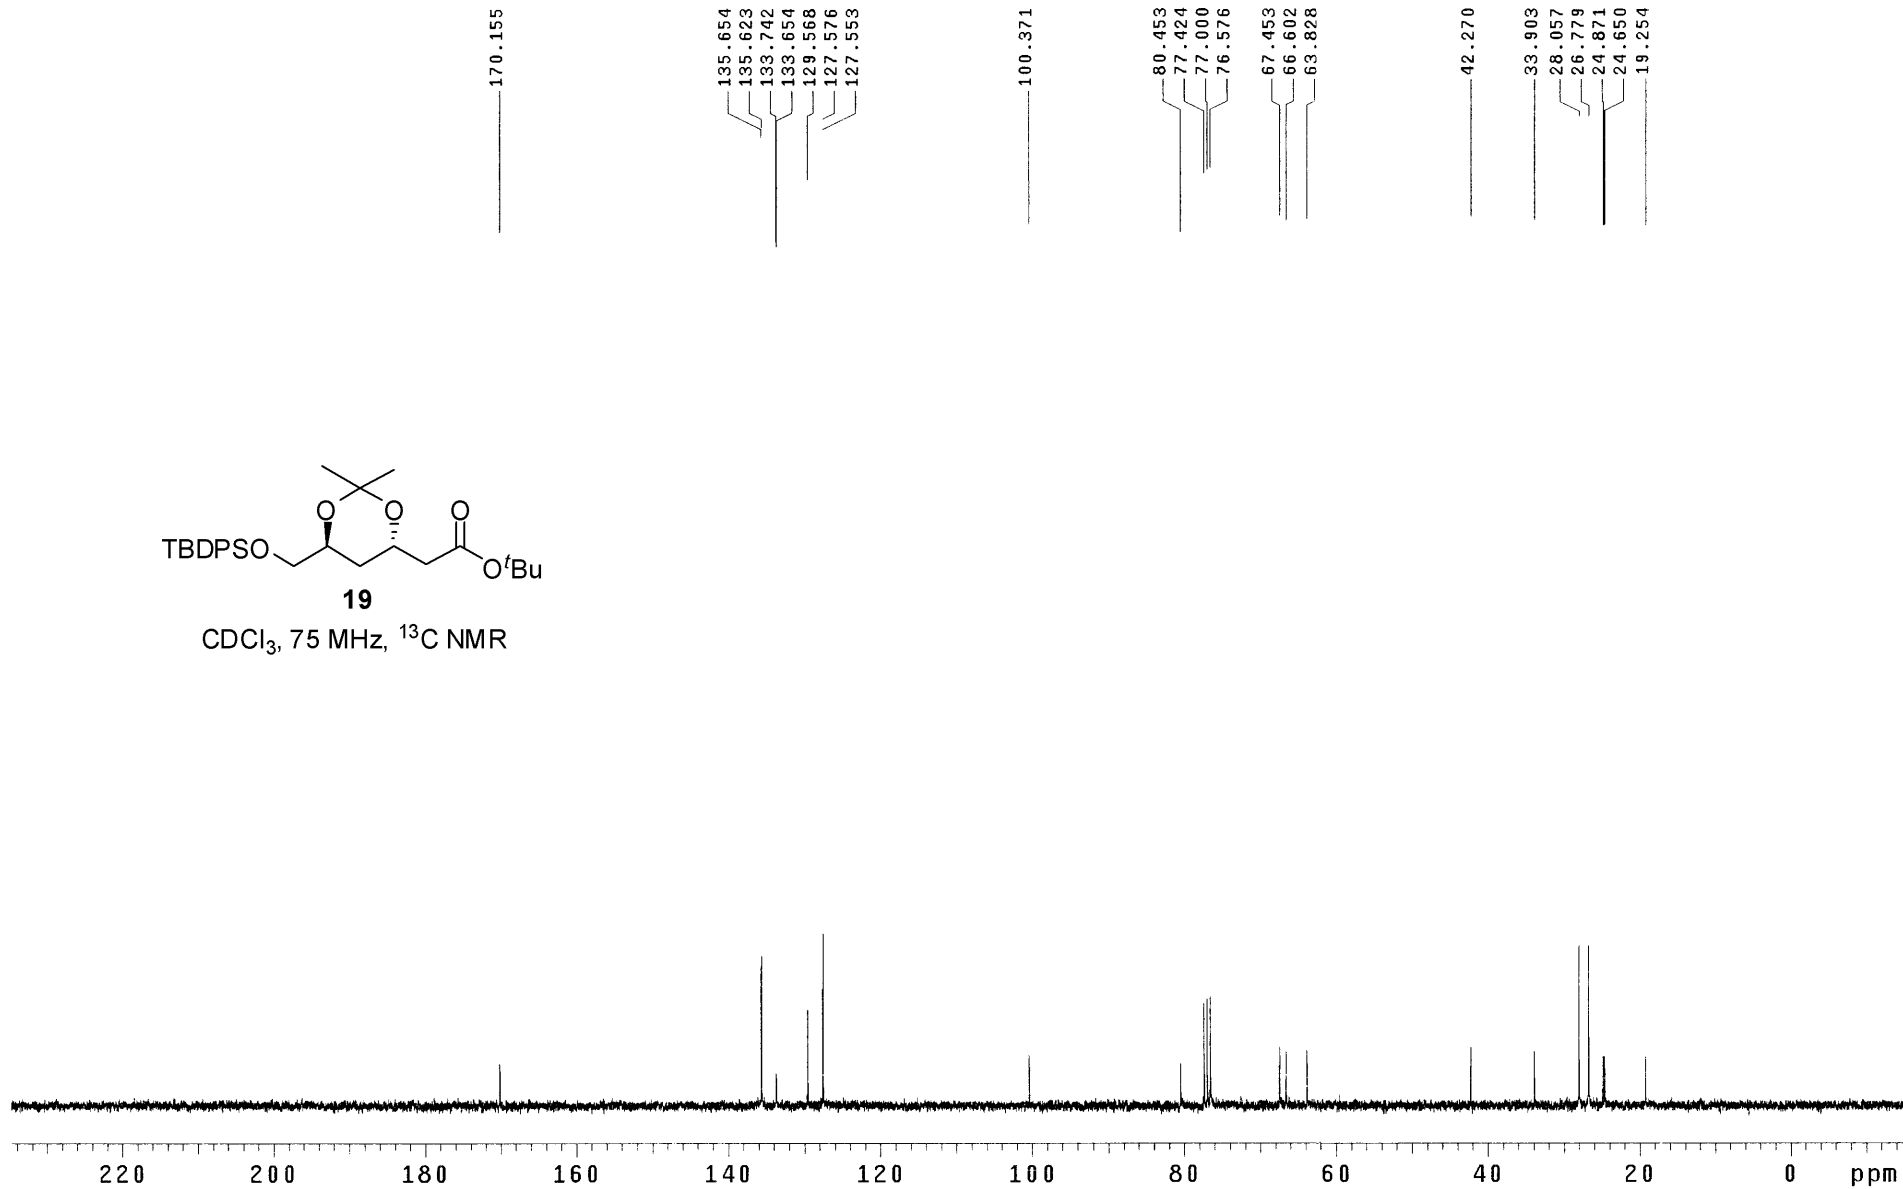

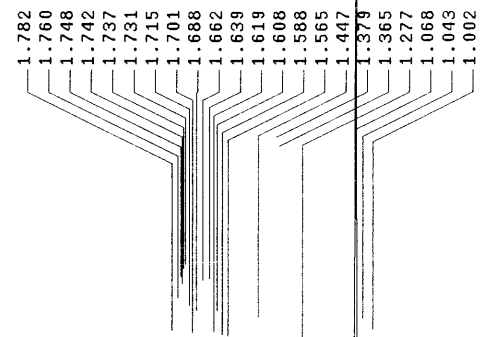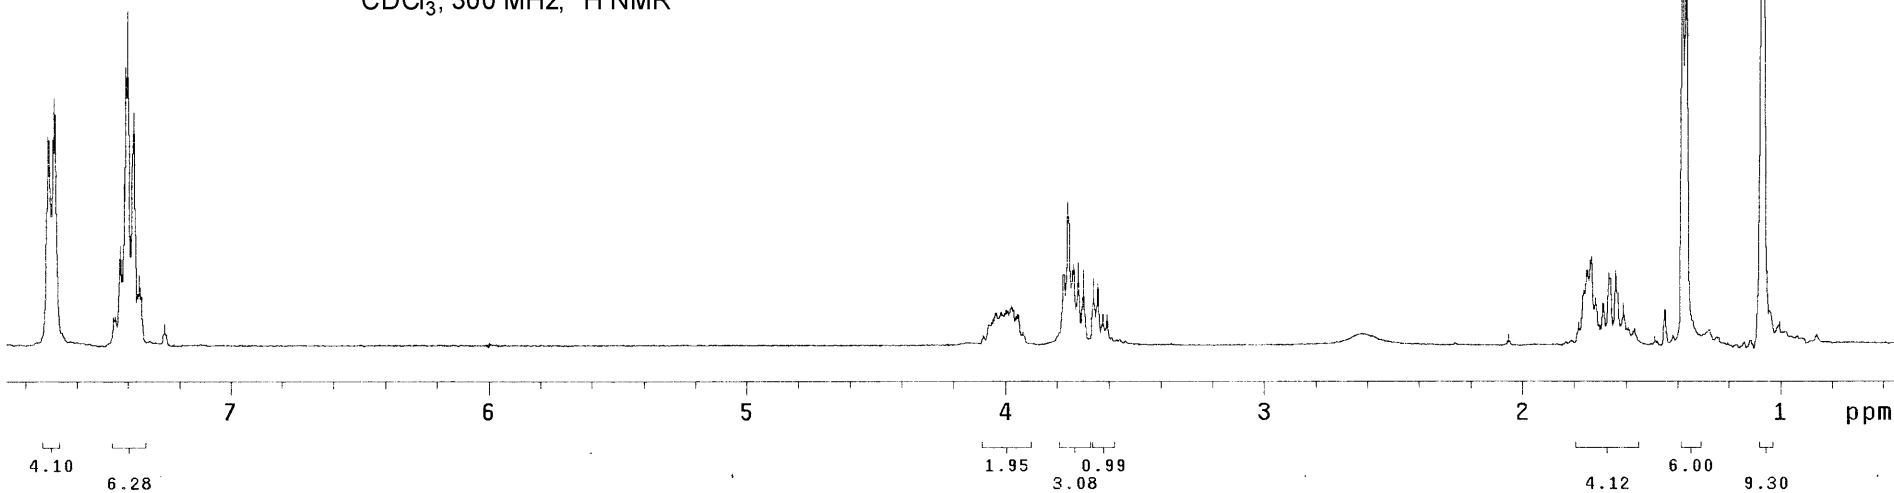

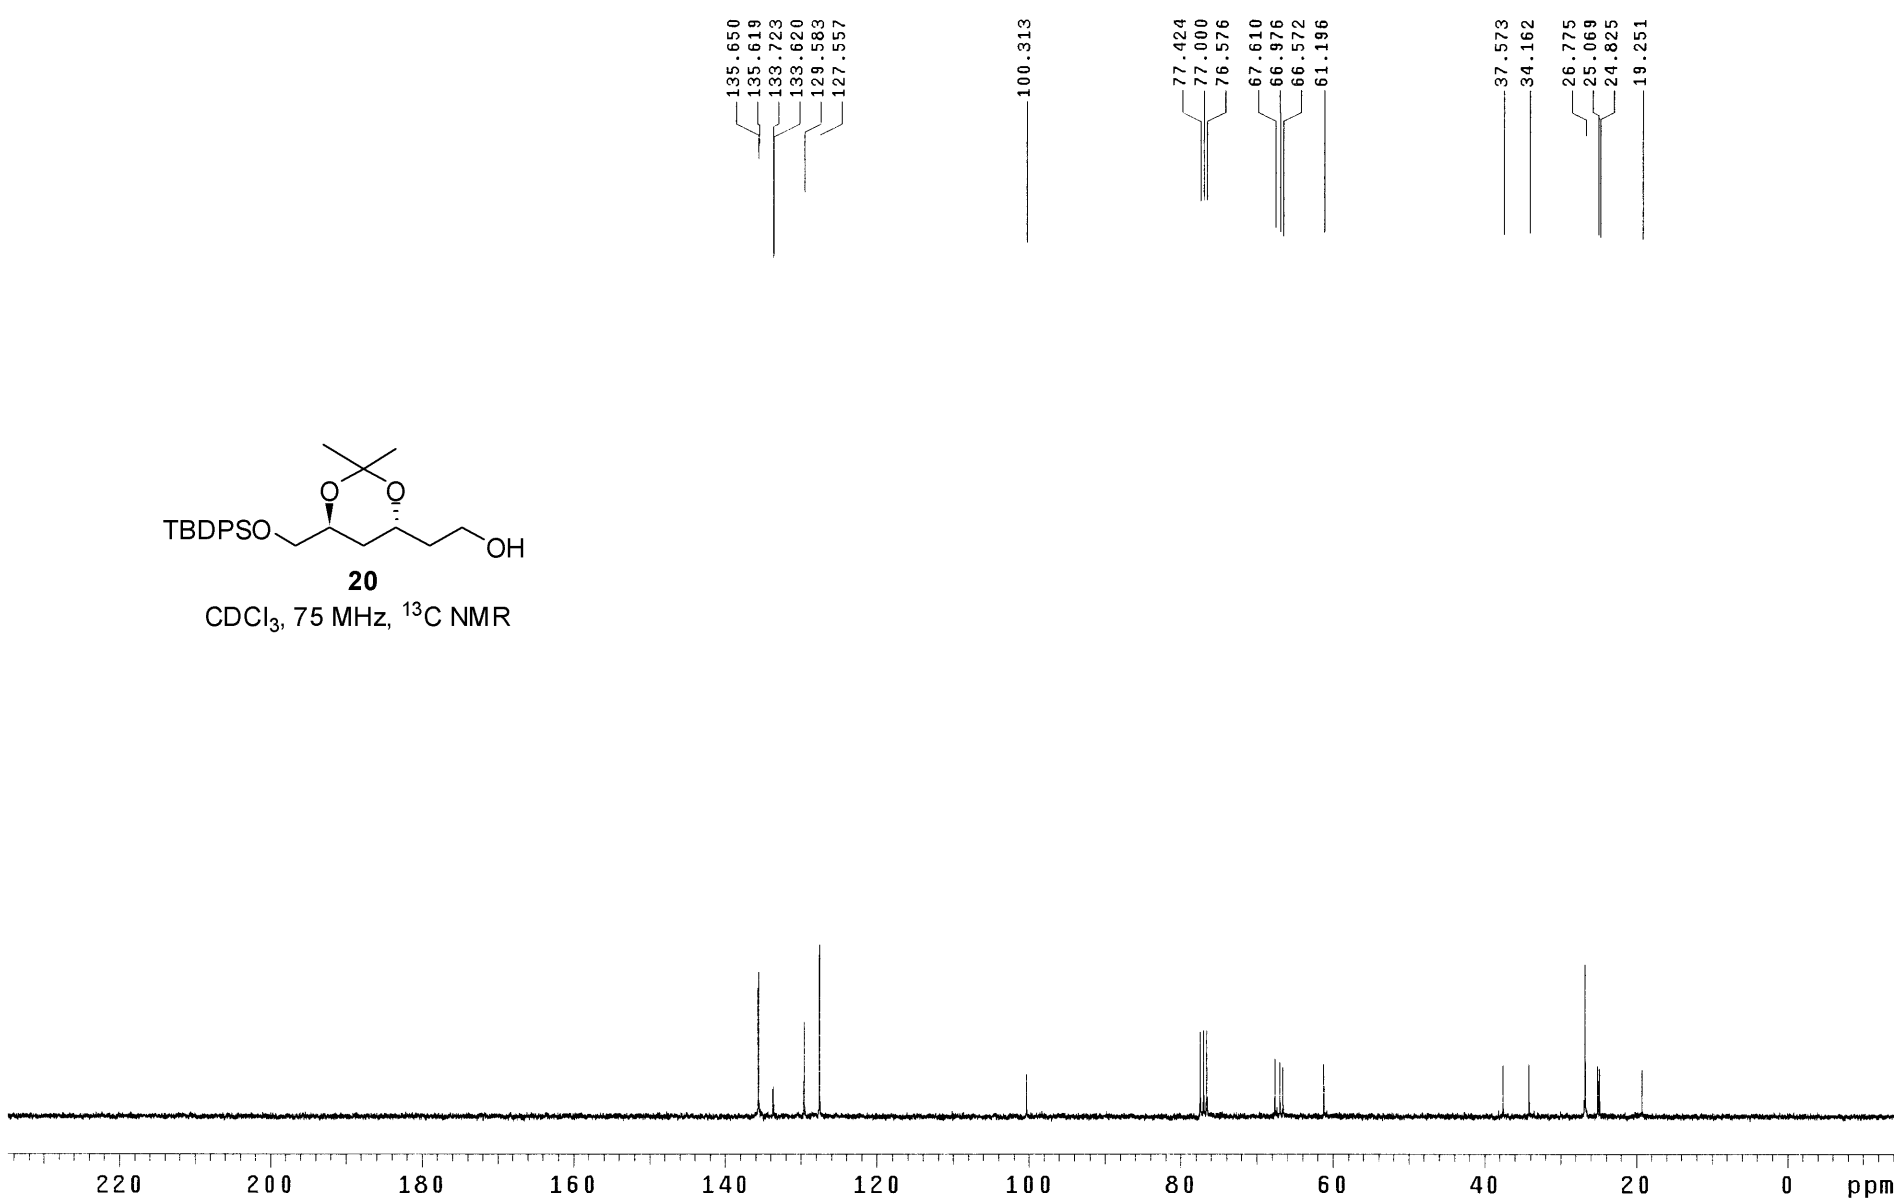



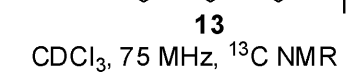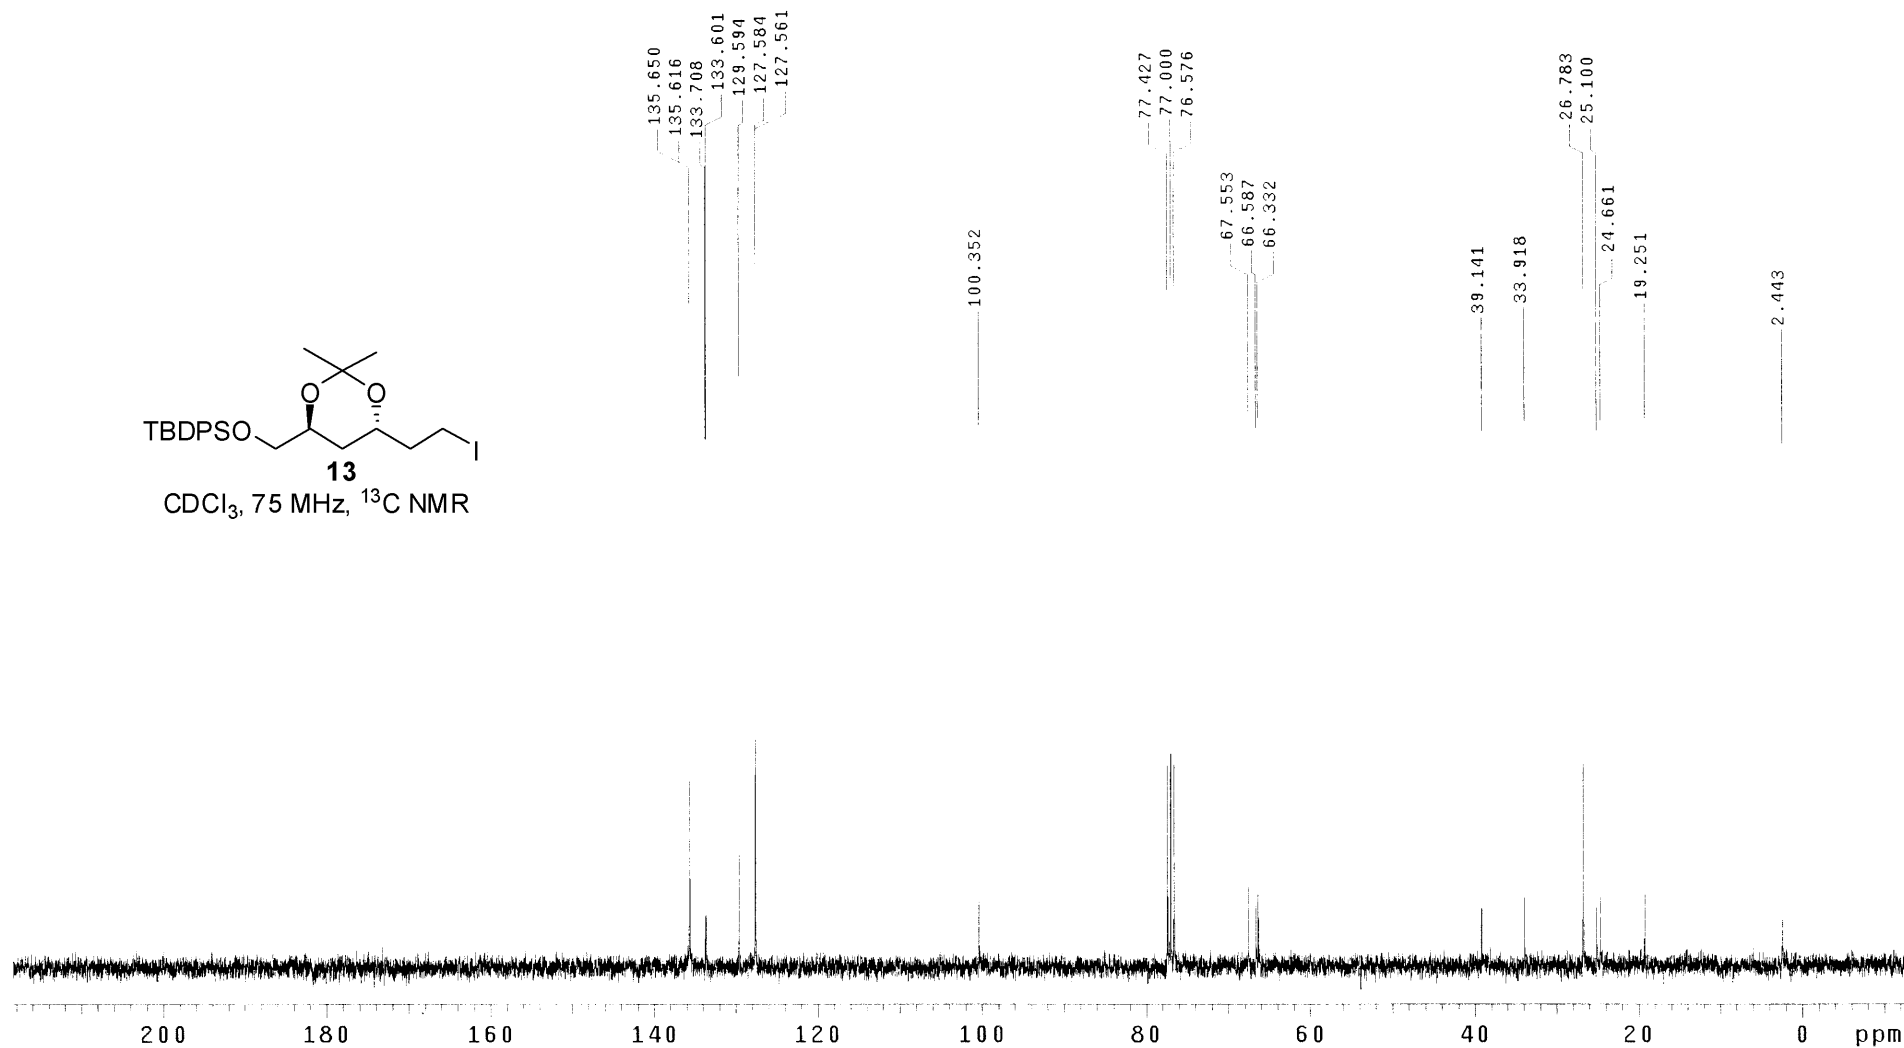

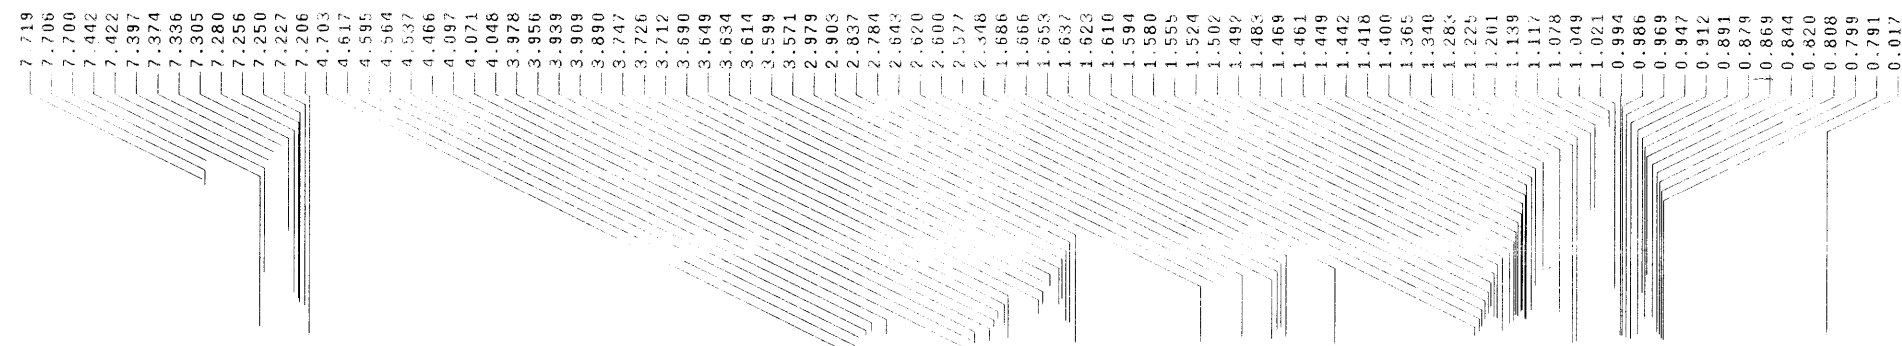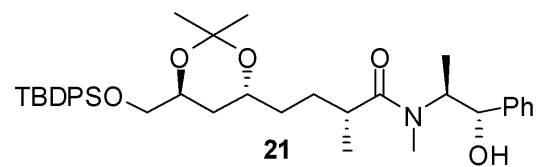

CDCl<sub>3</sub>, 300 MHz, <sup>1</sup>H NMR

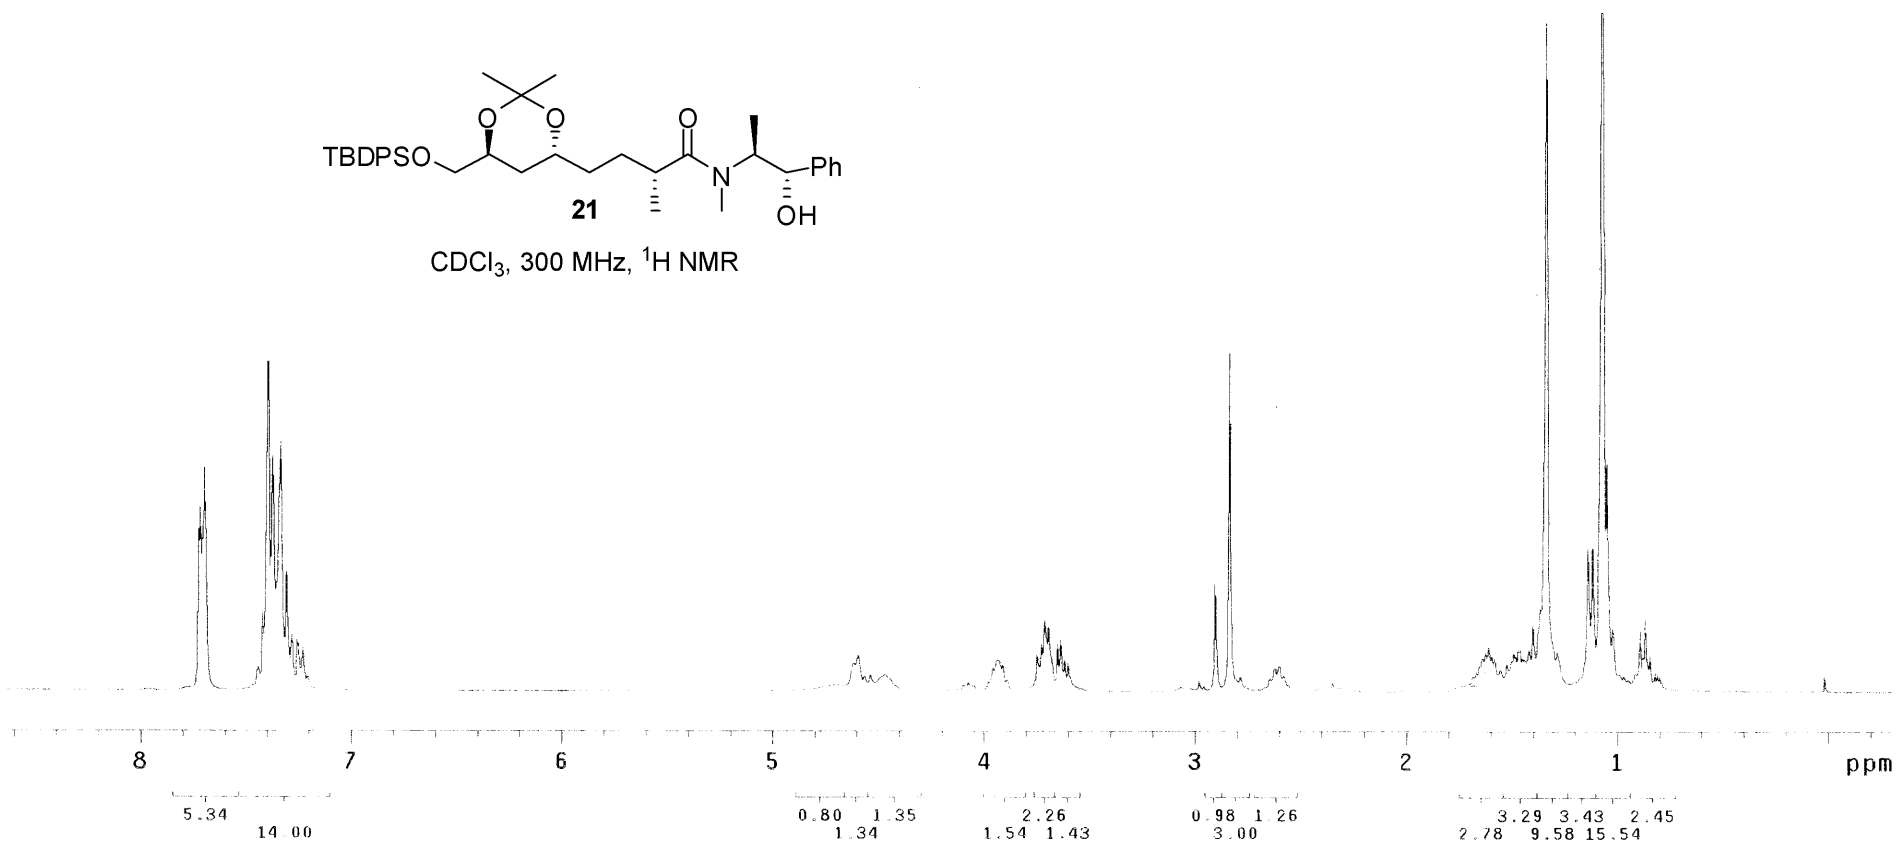



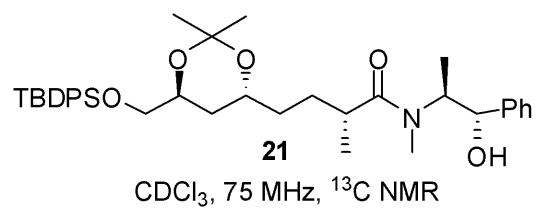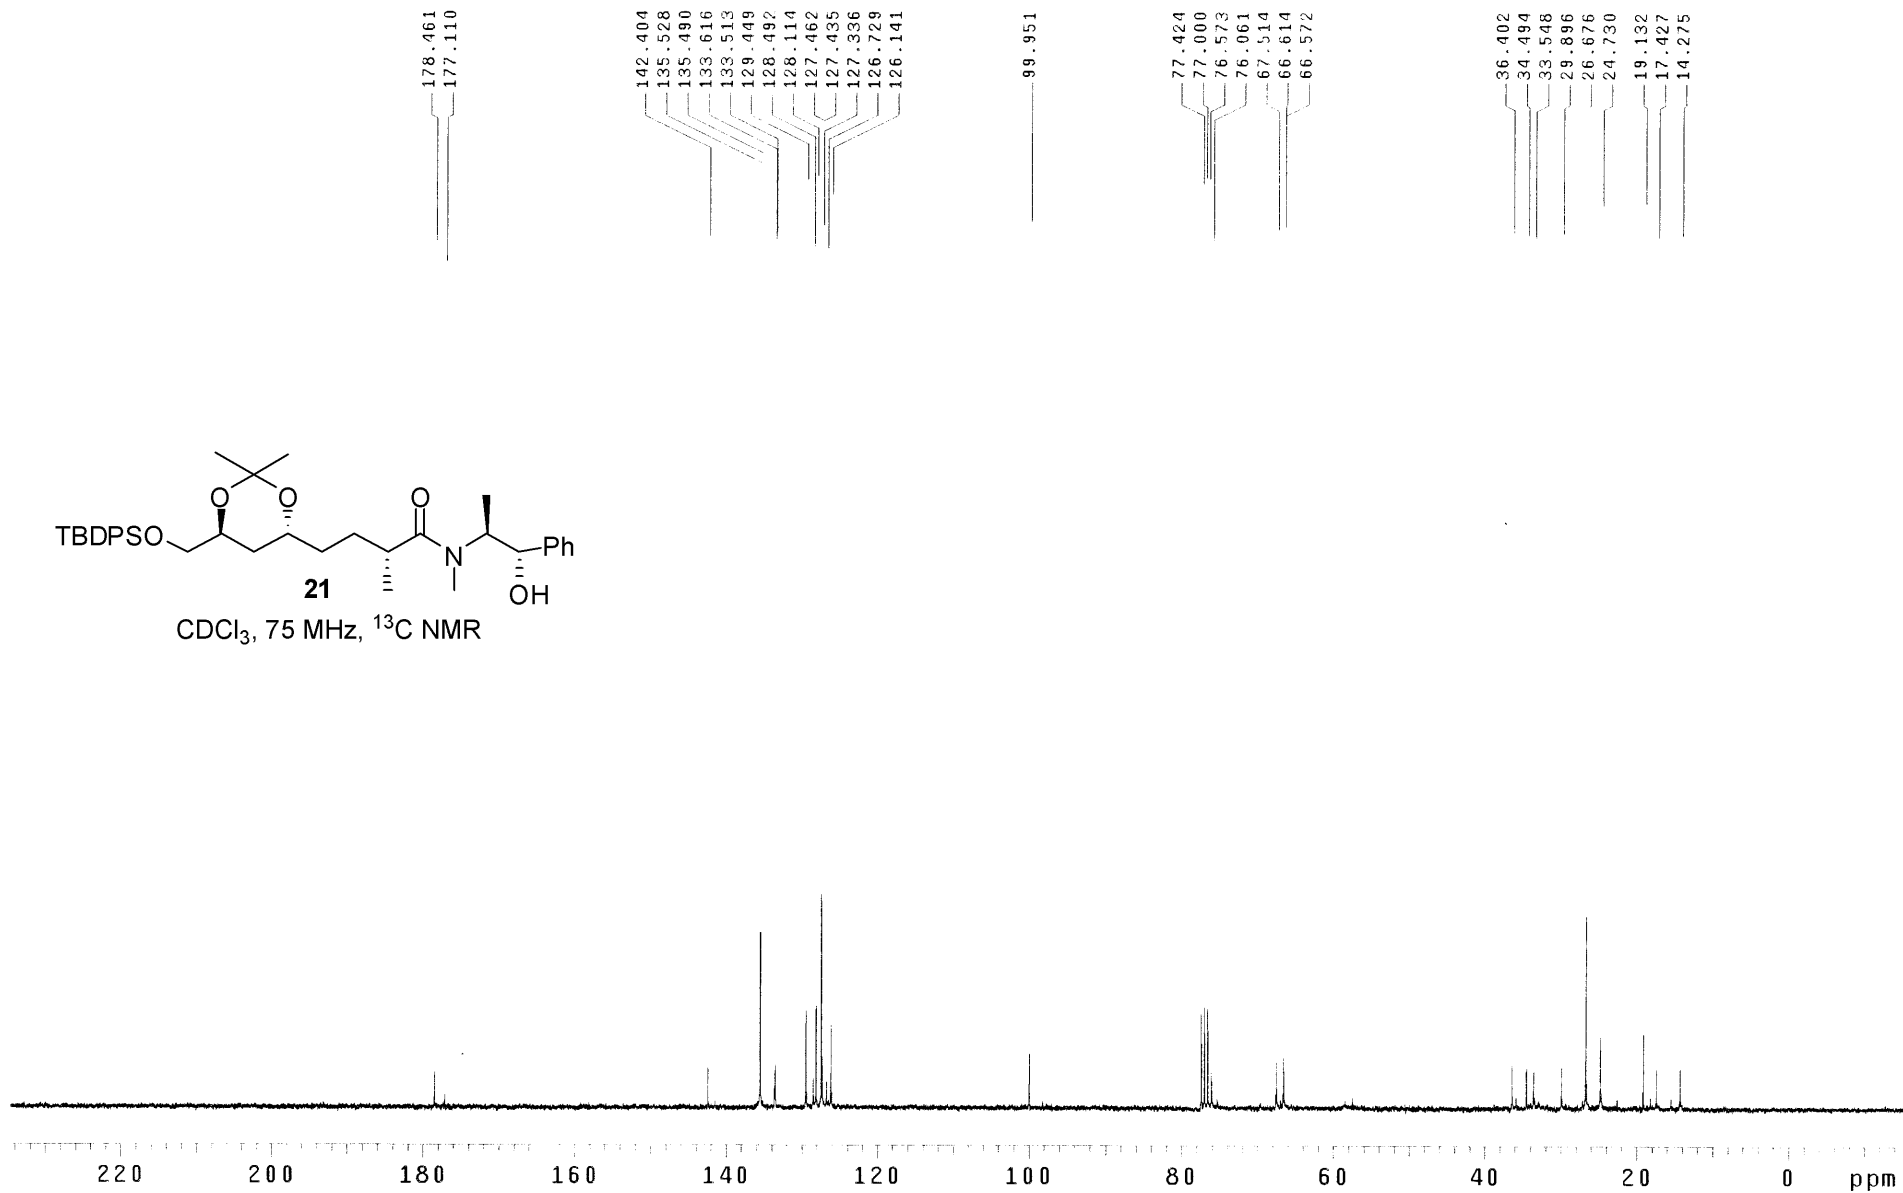

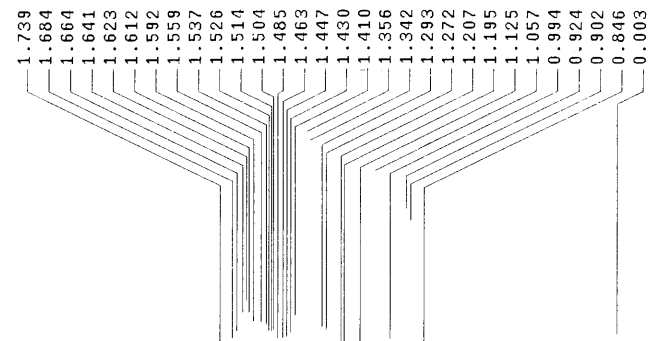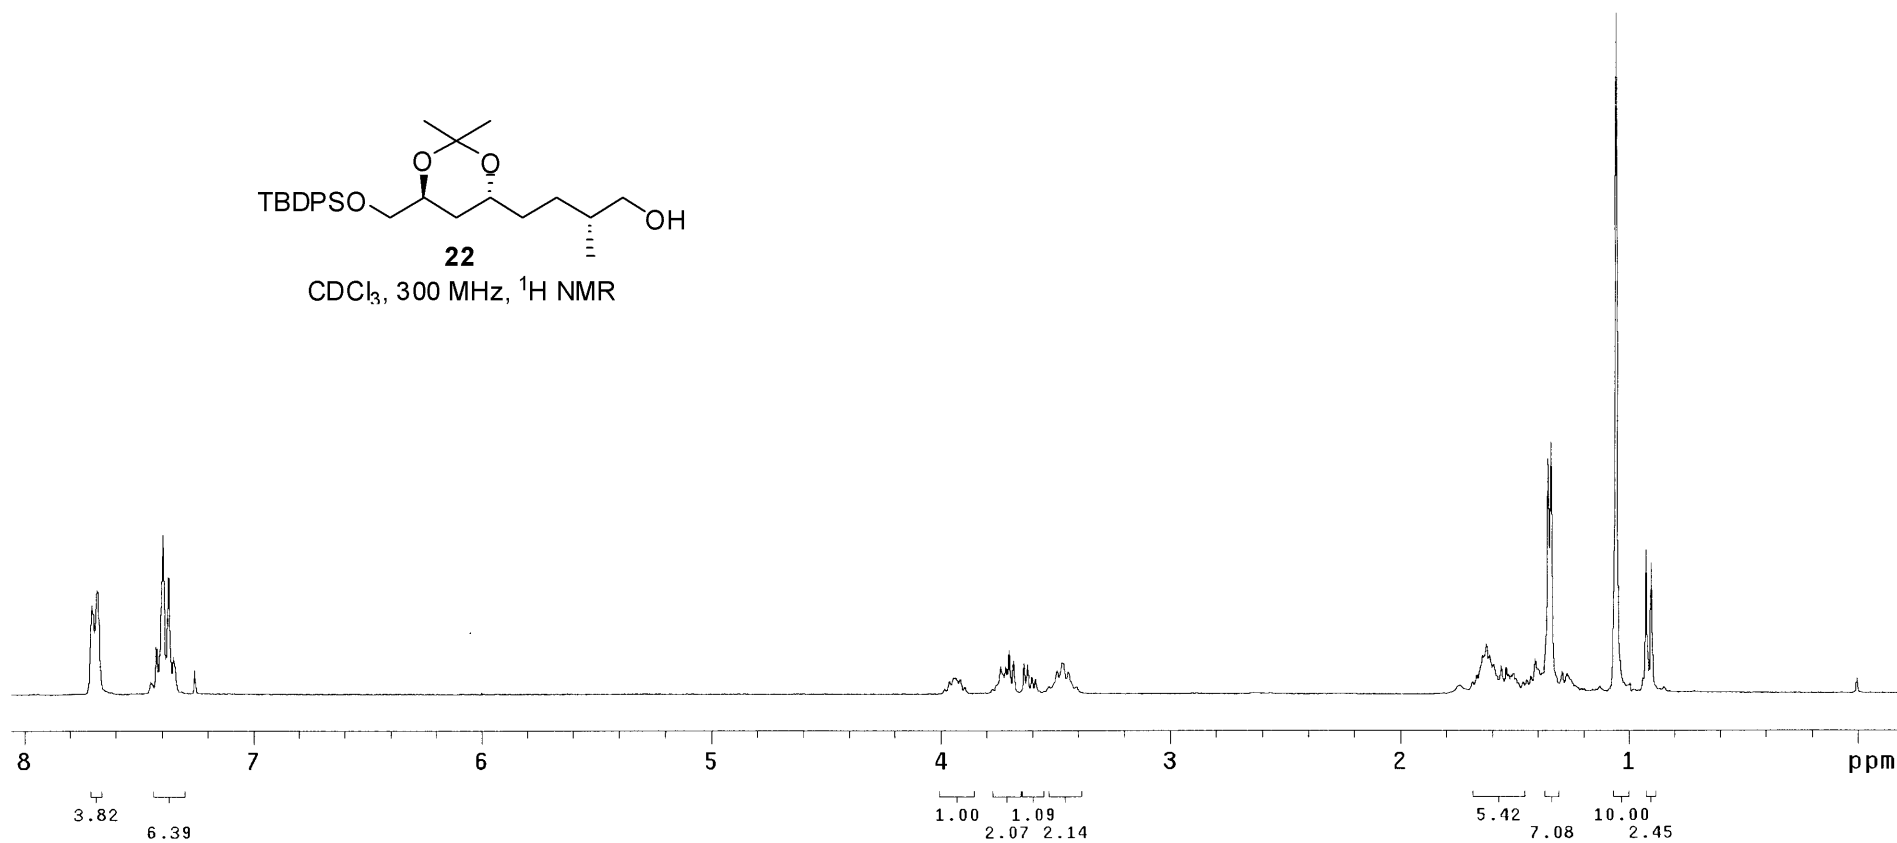

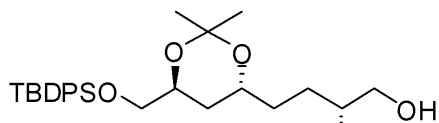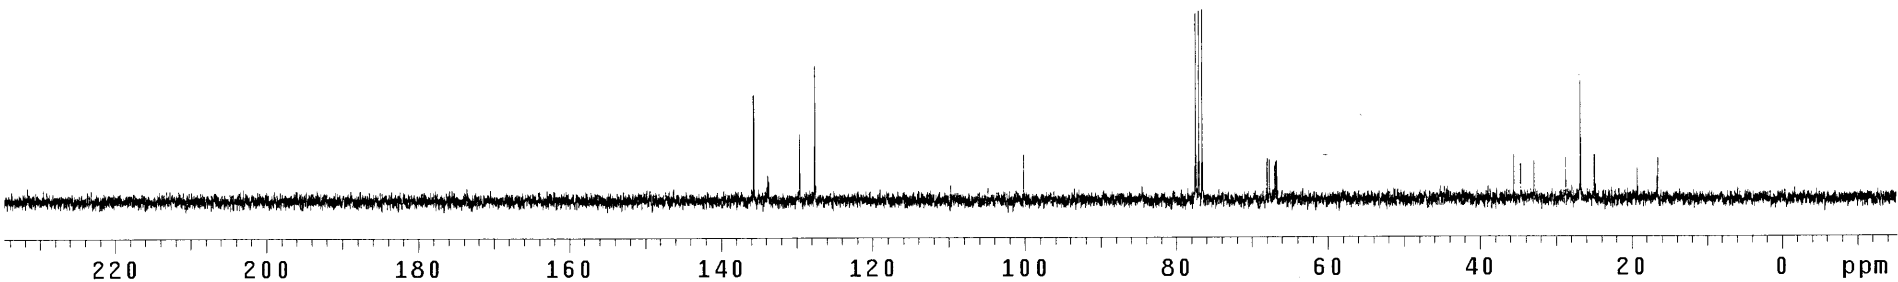

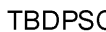

23

CDCl<sub>3</sub>, 300 MHz, <sup>1</sup>H NMR

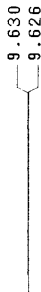[illegible]

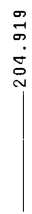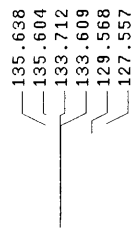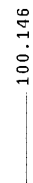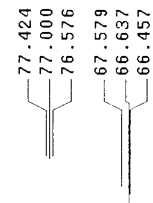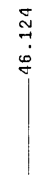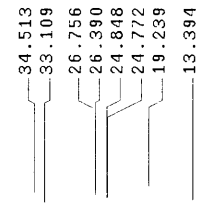

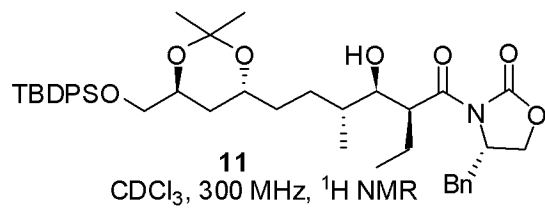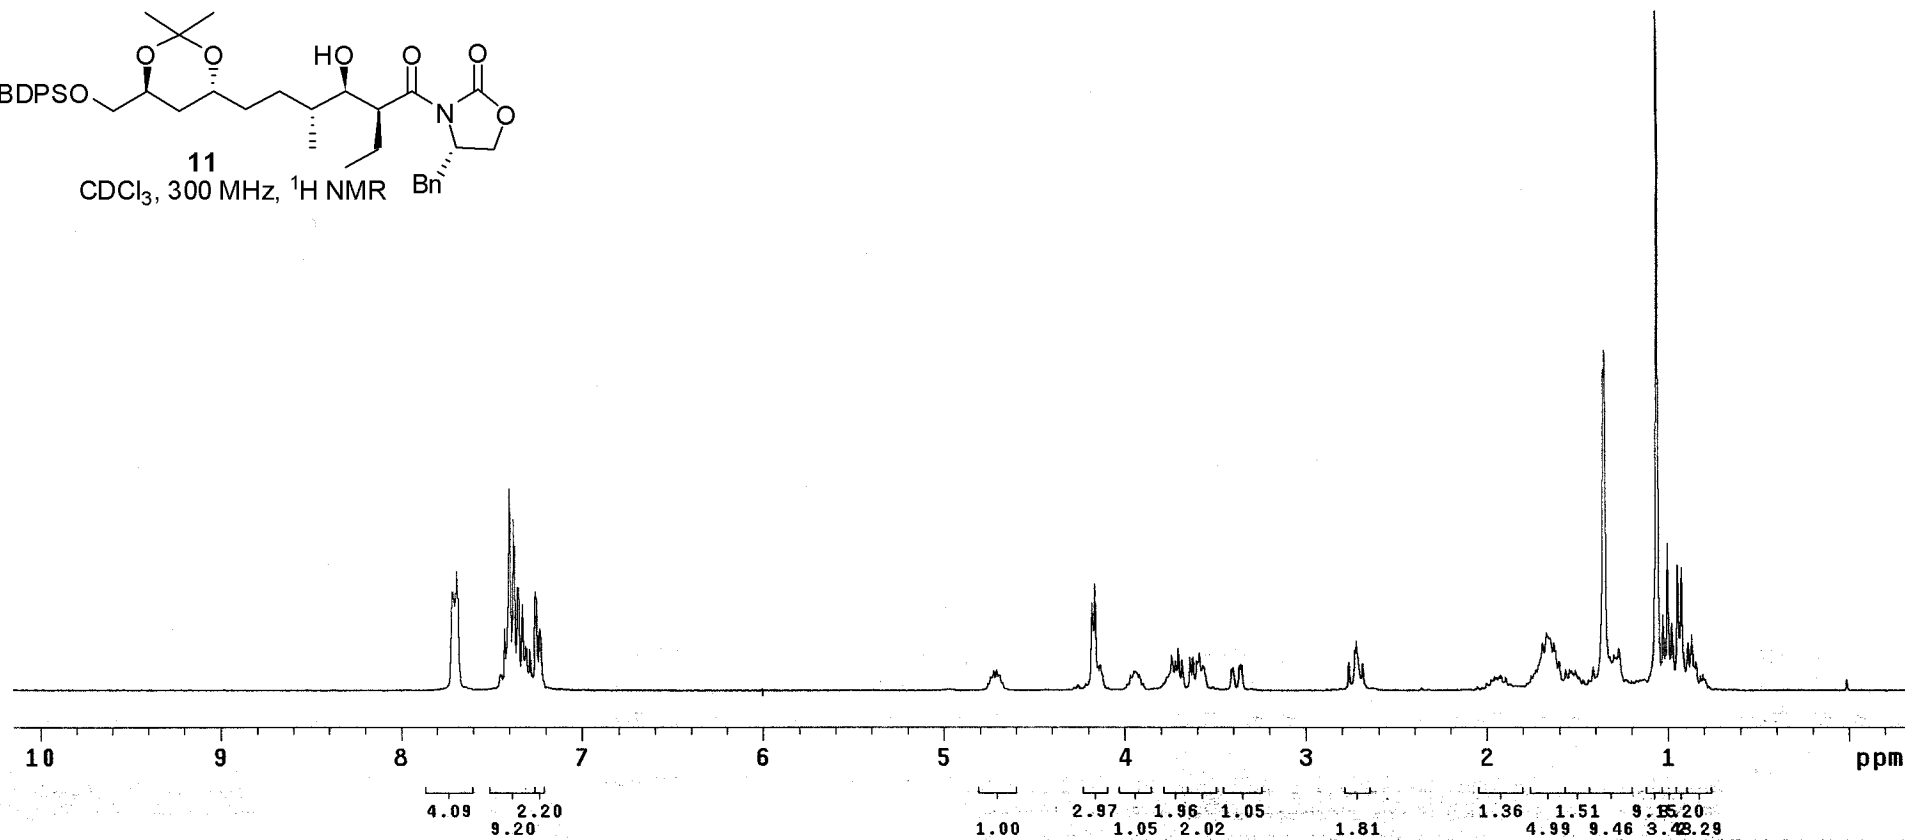

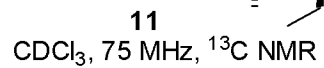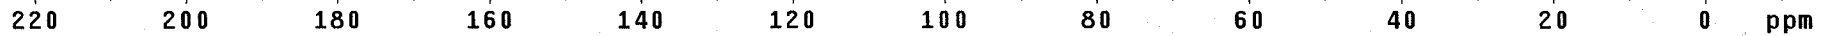

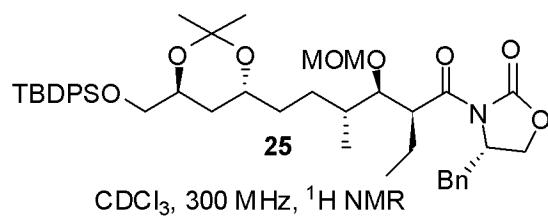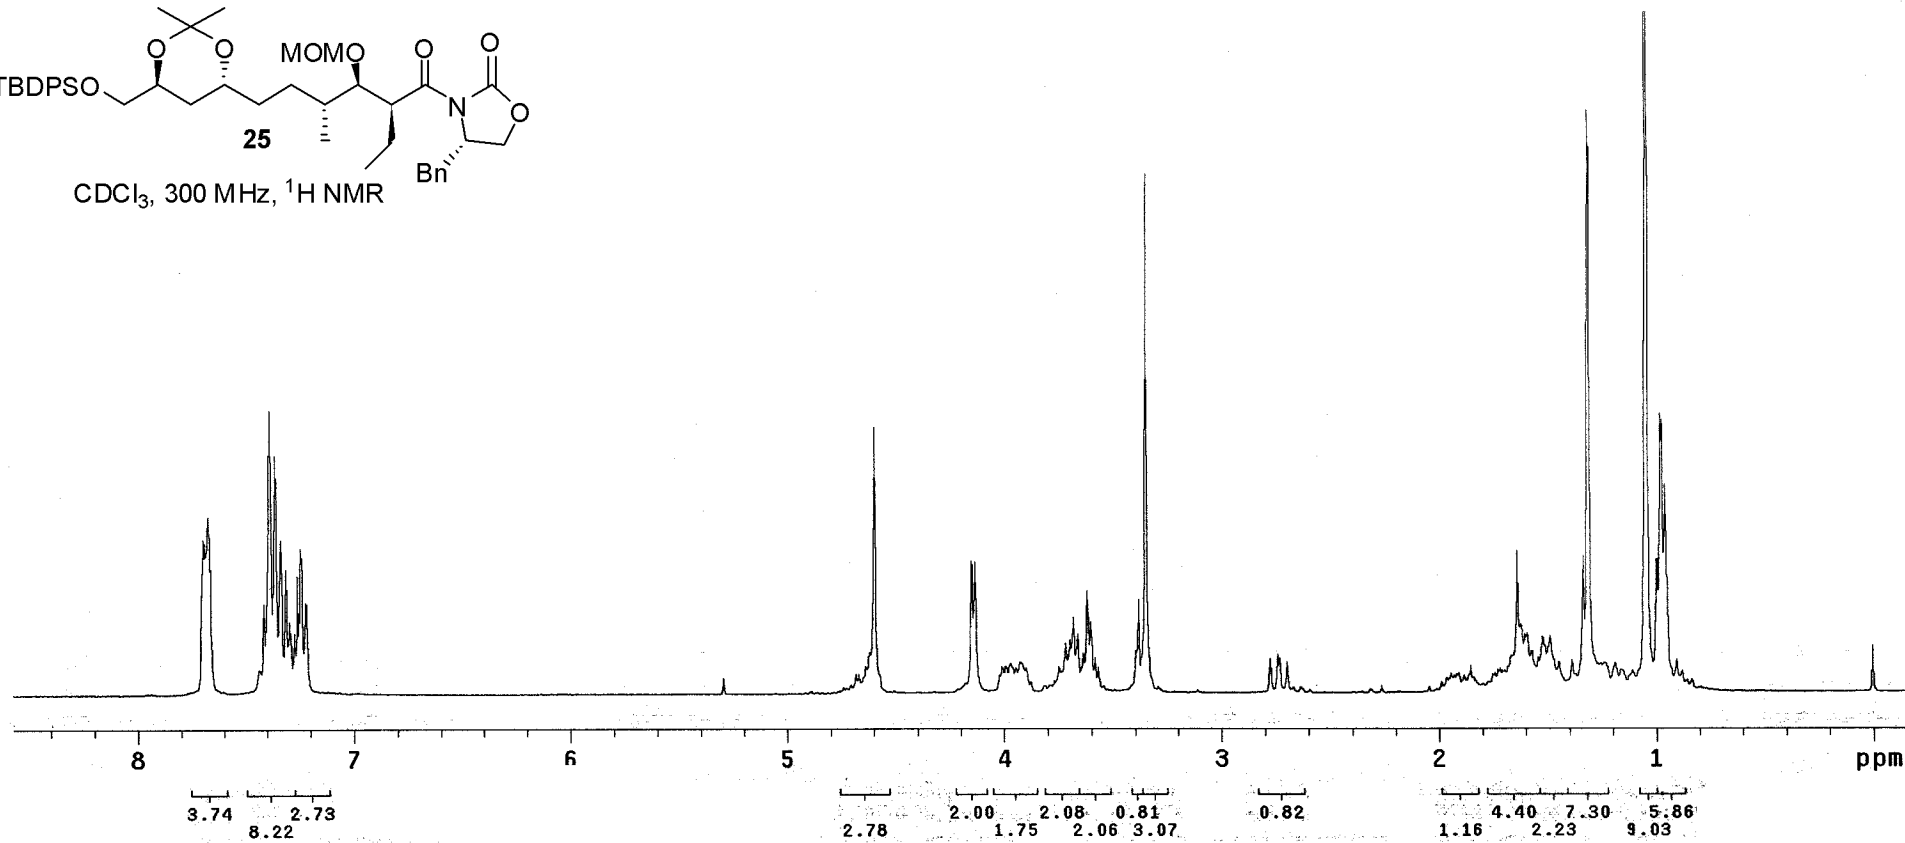



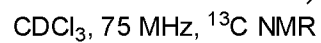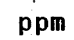

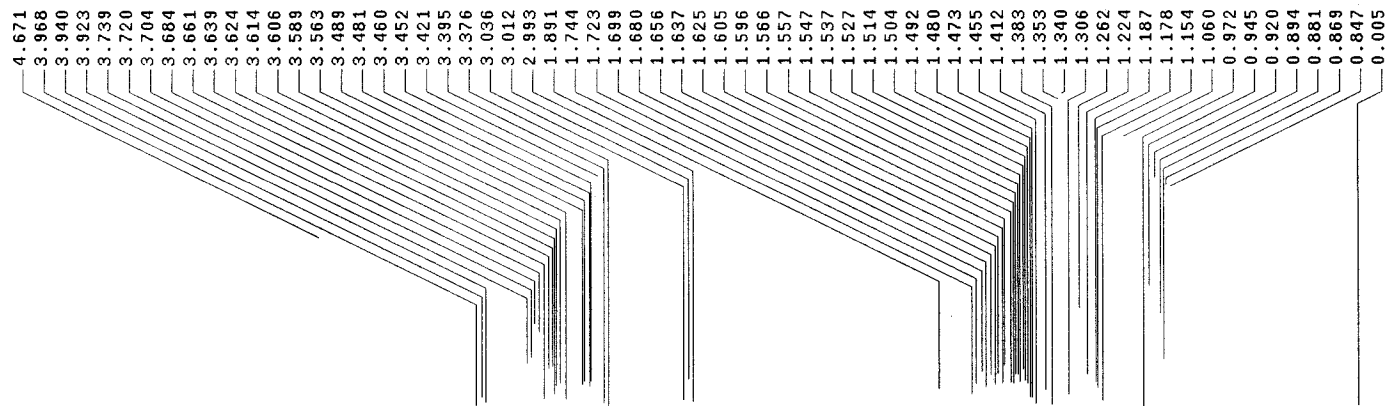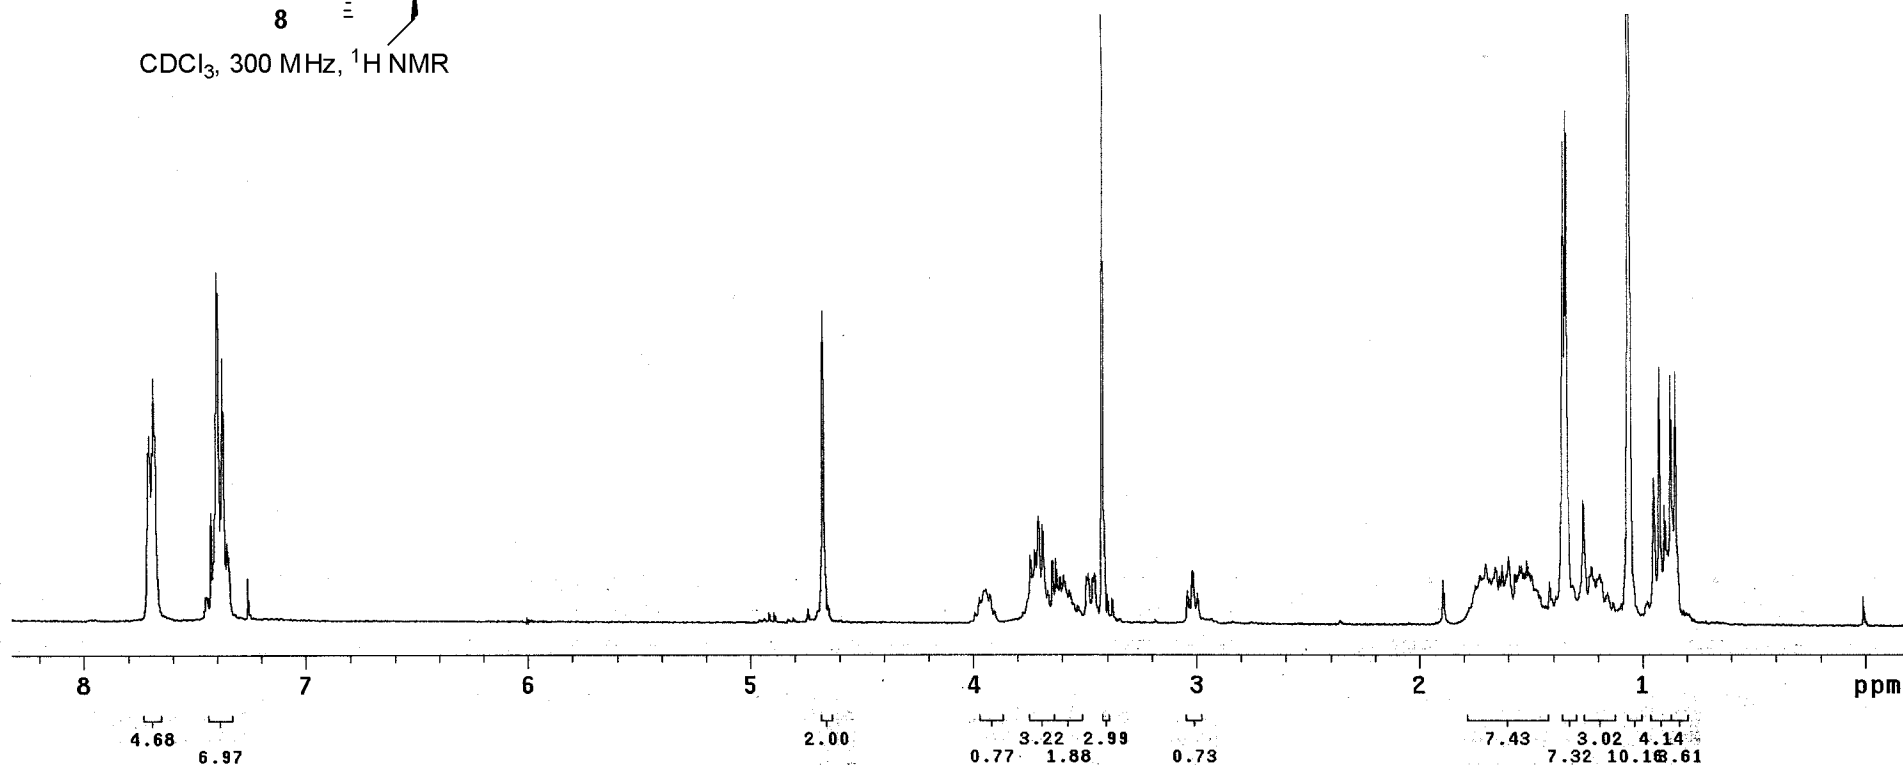

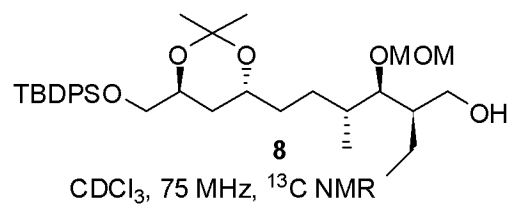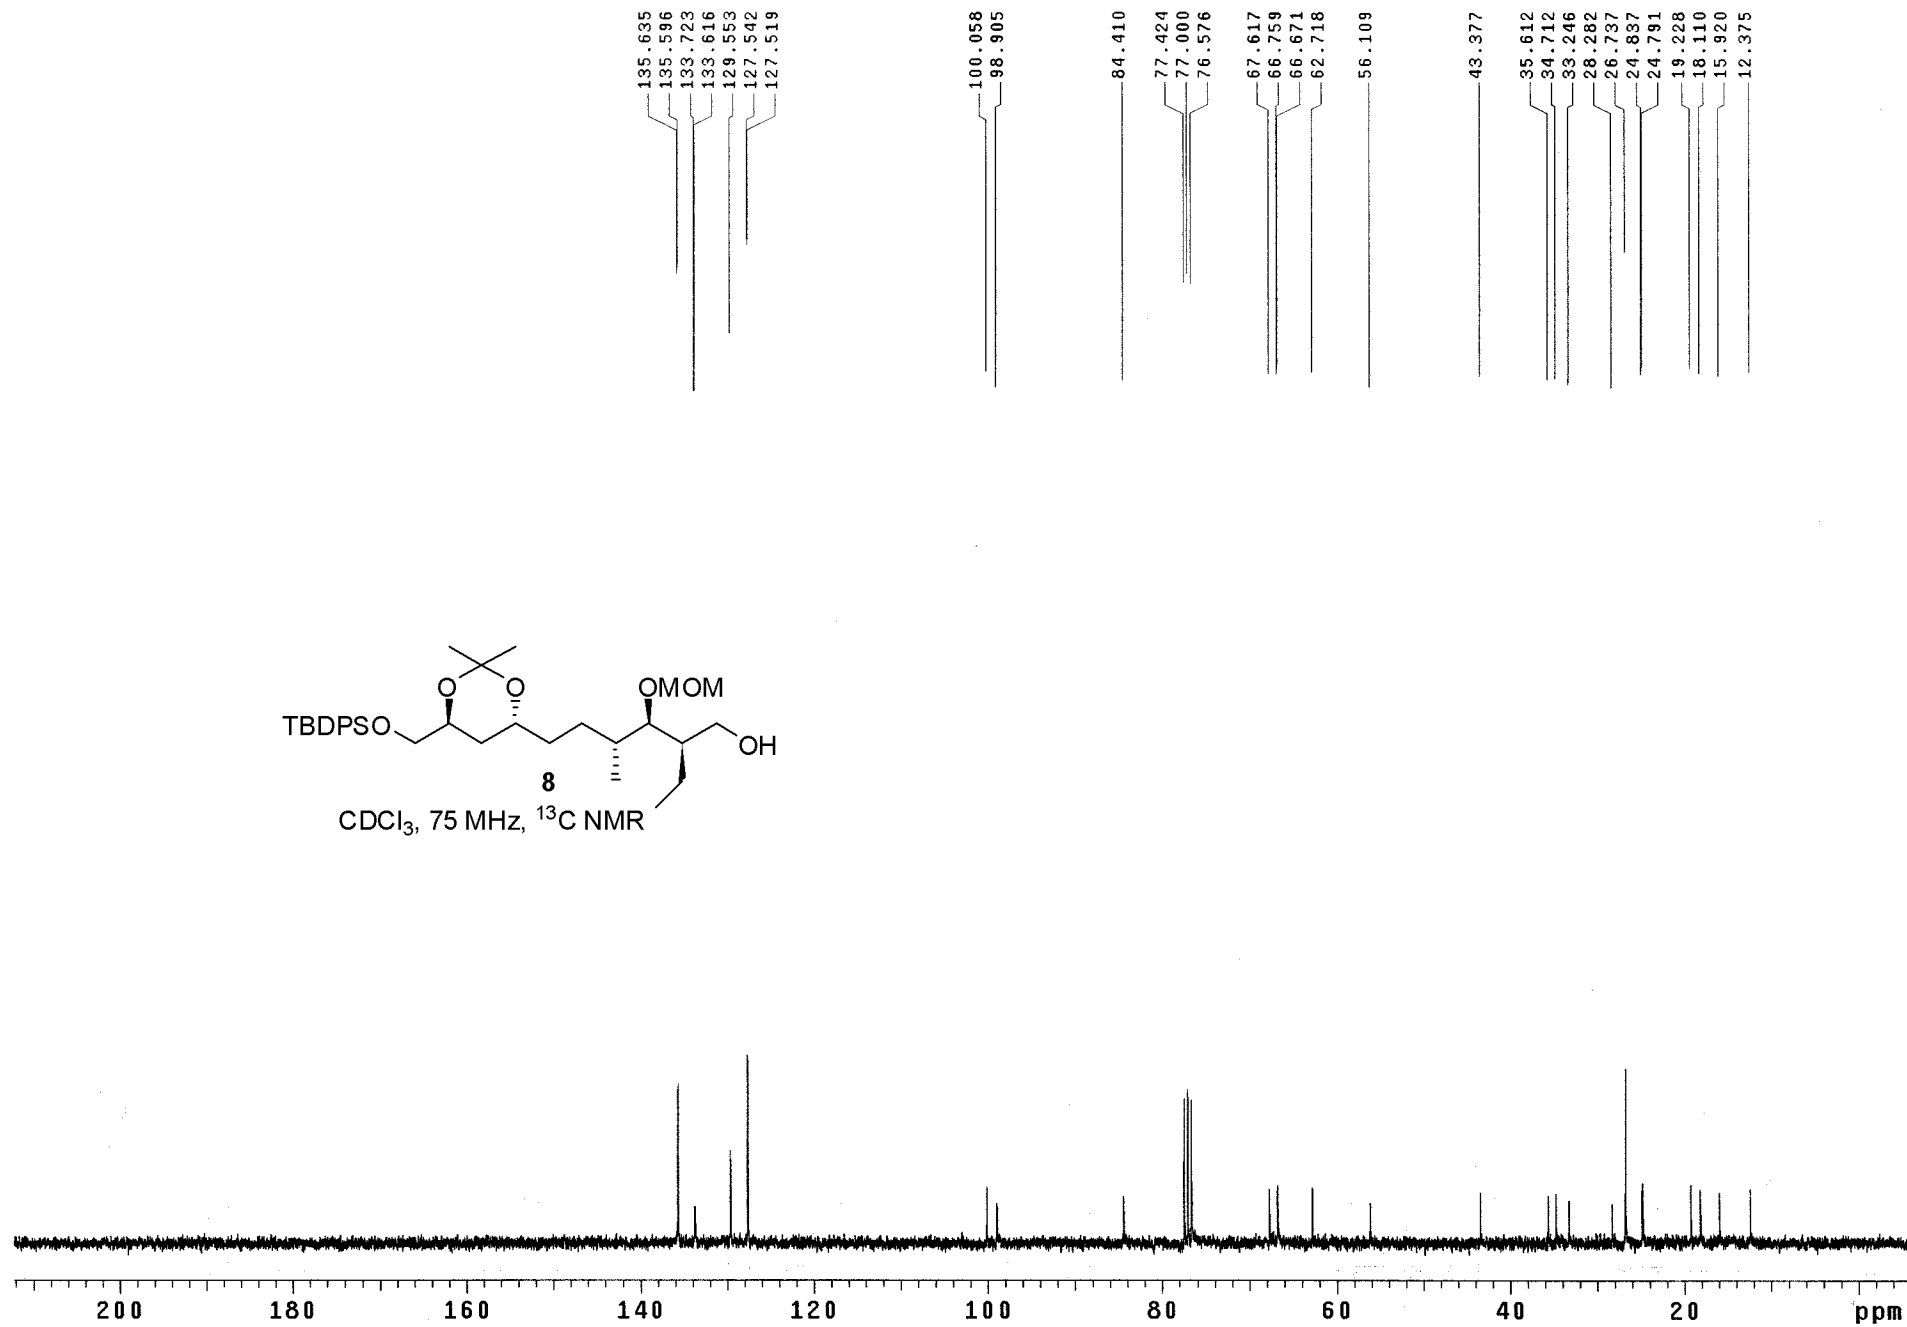

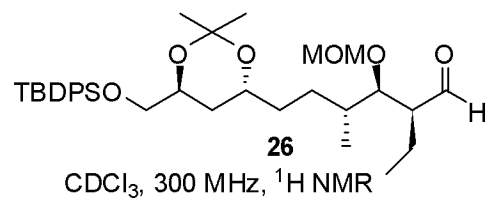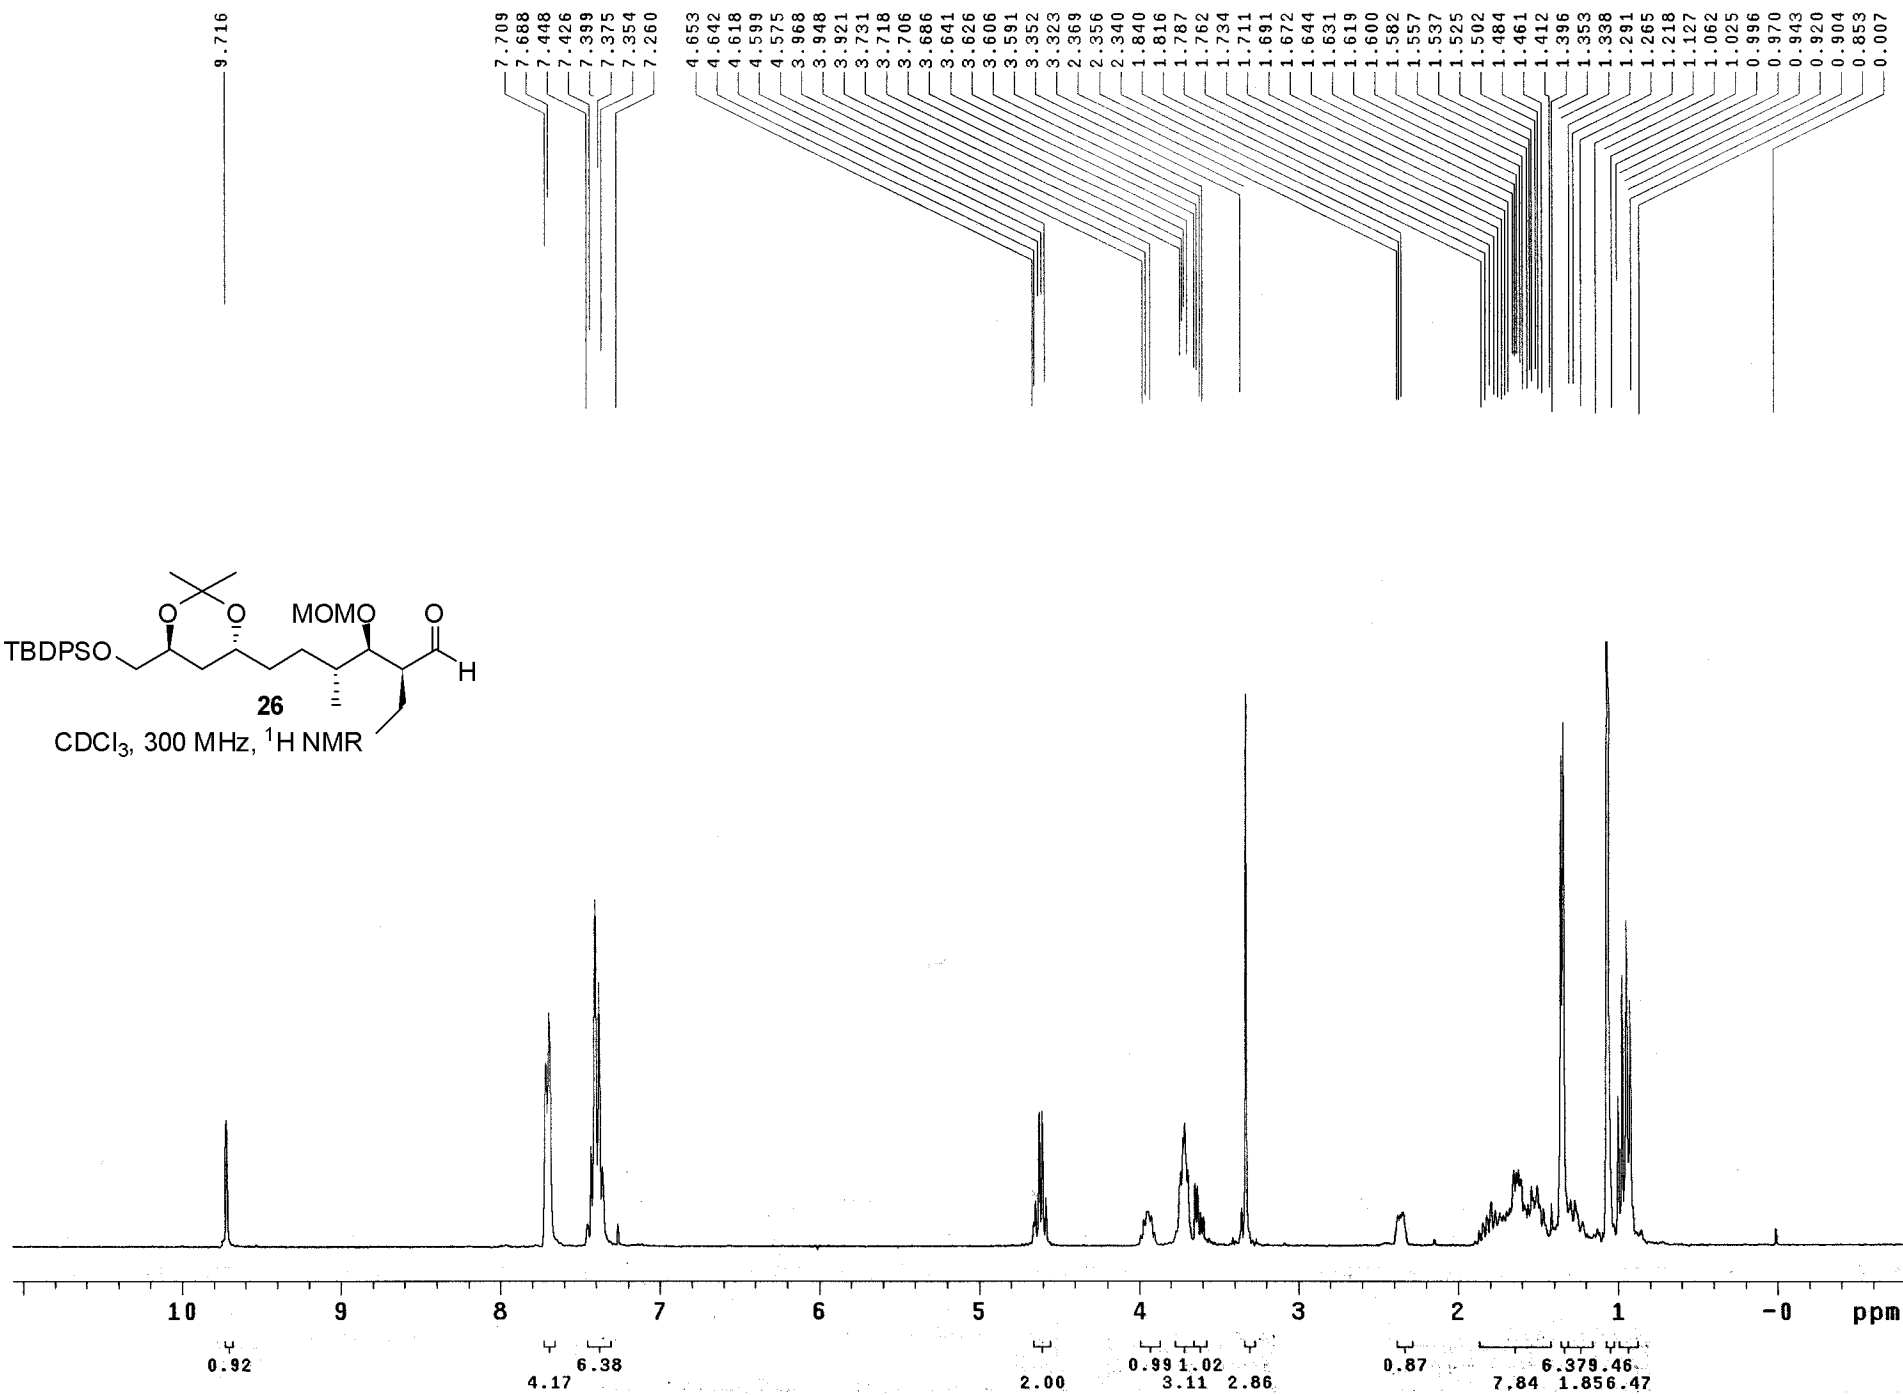

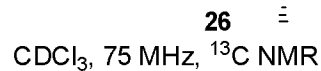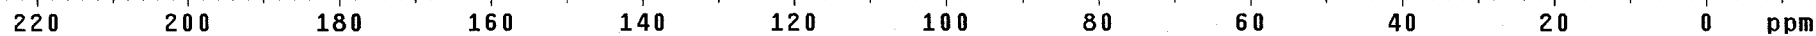





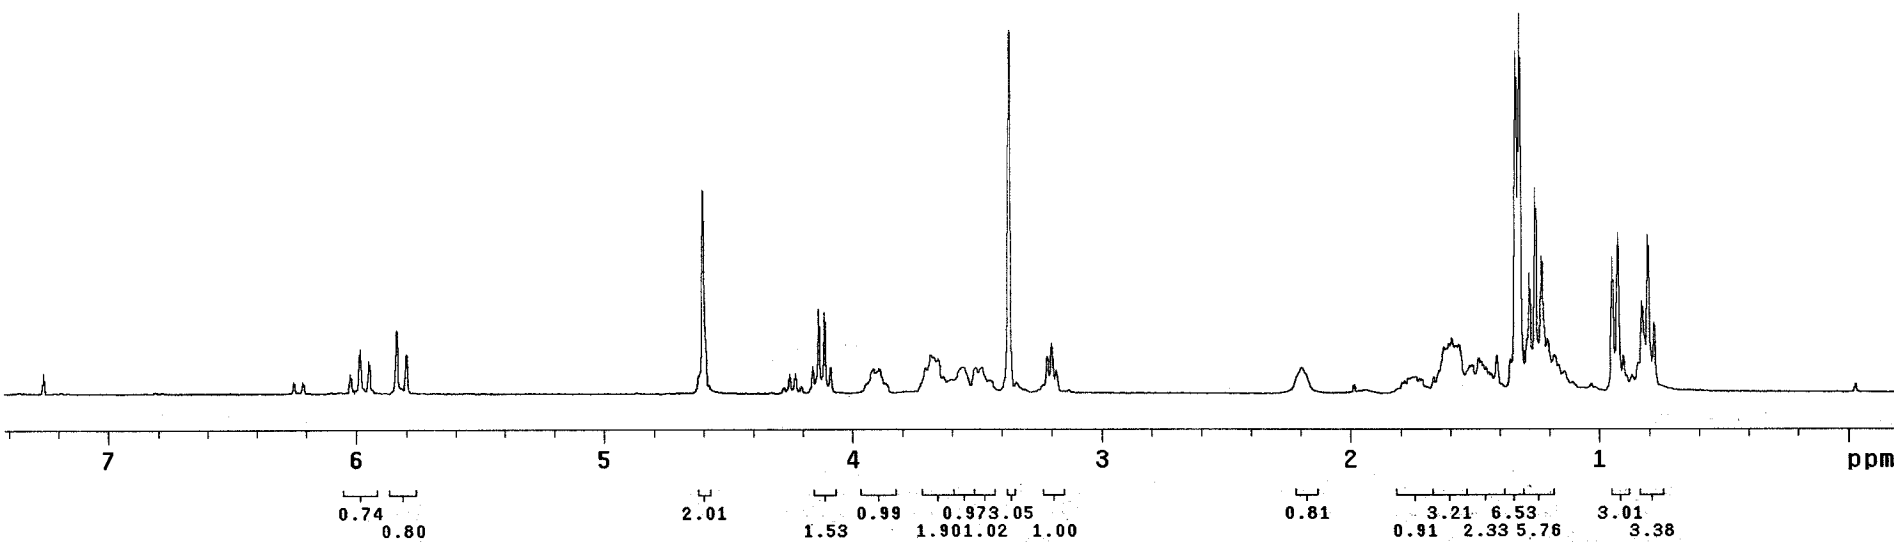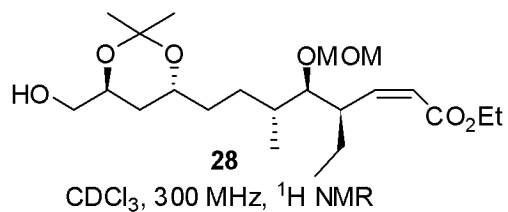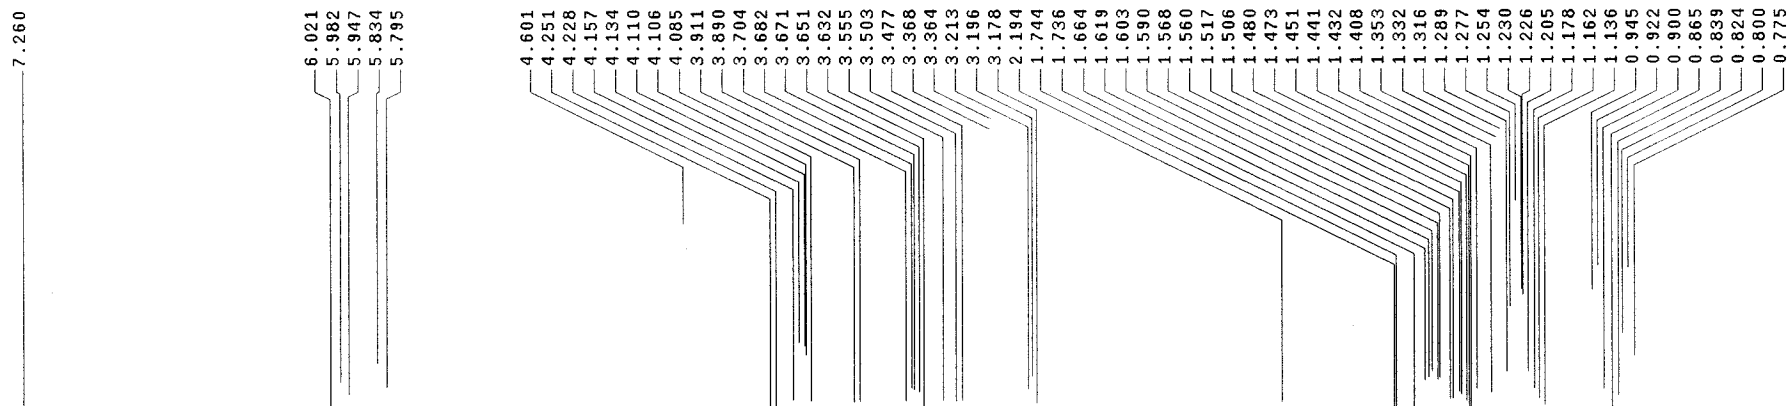



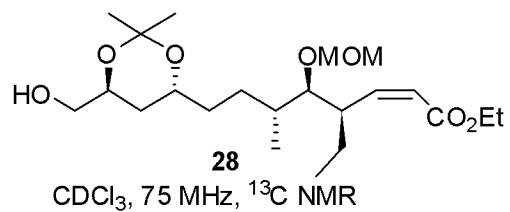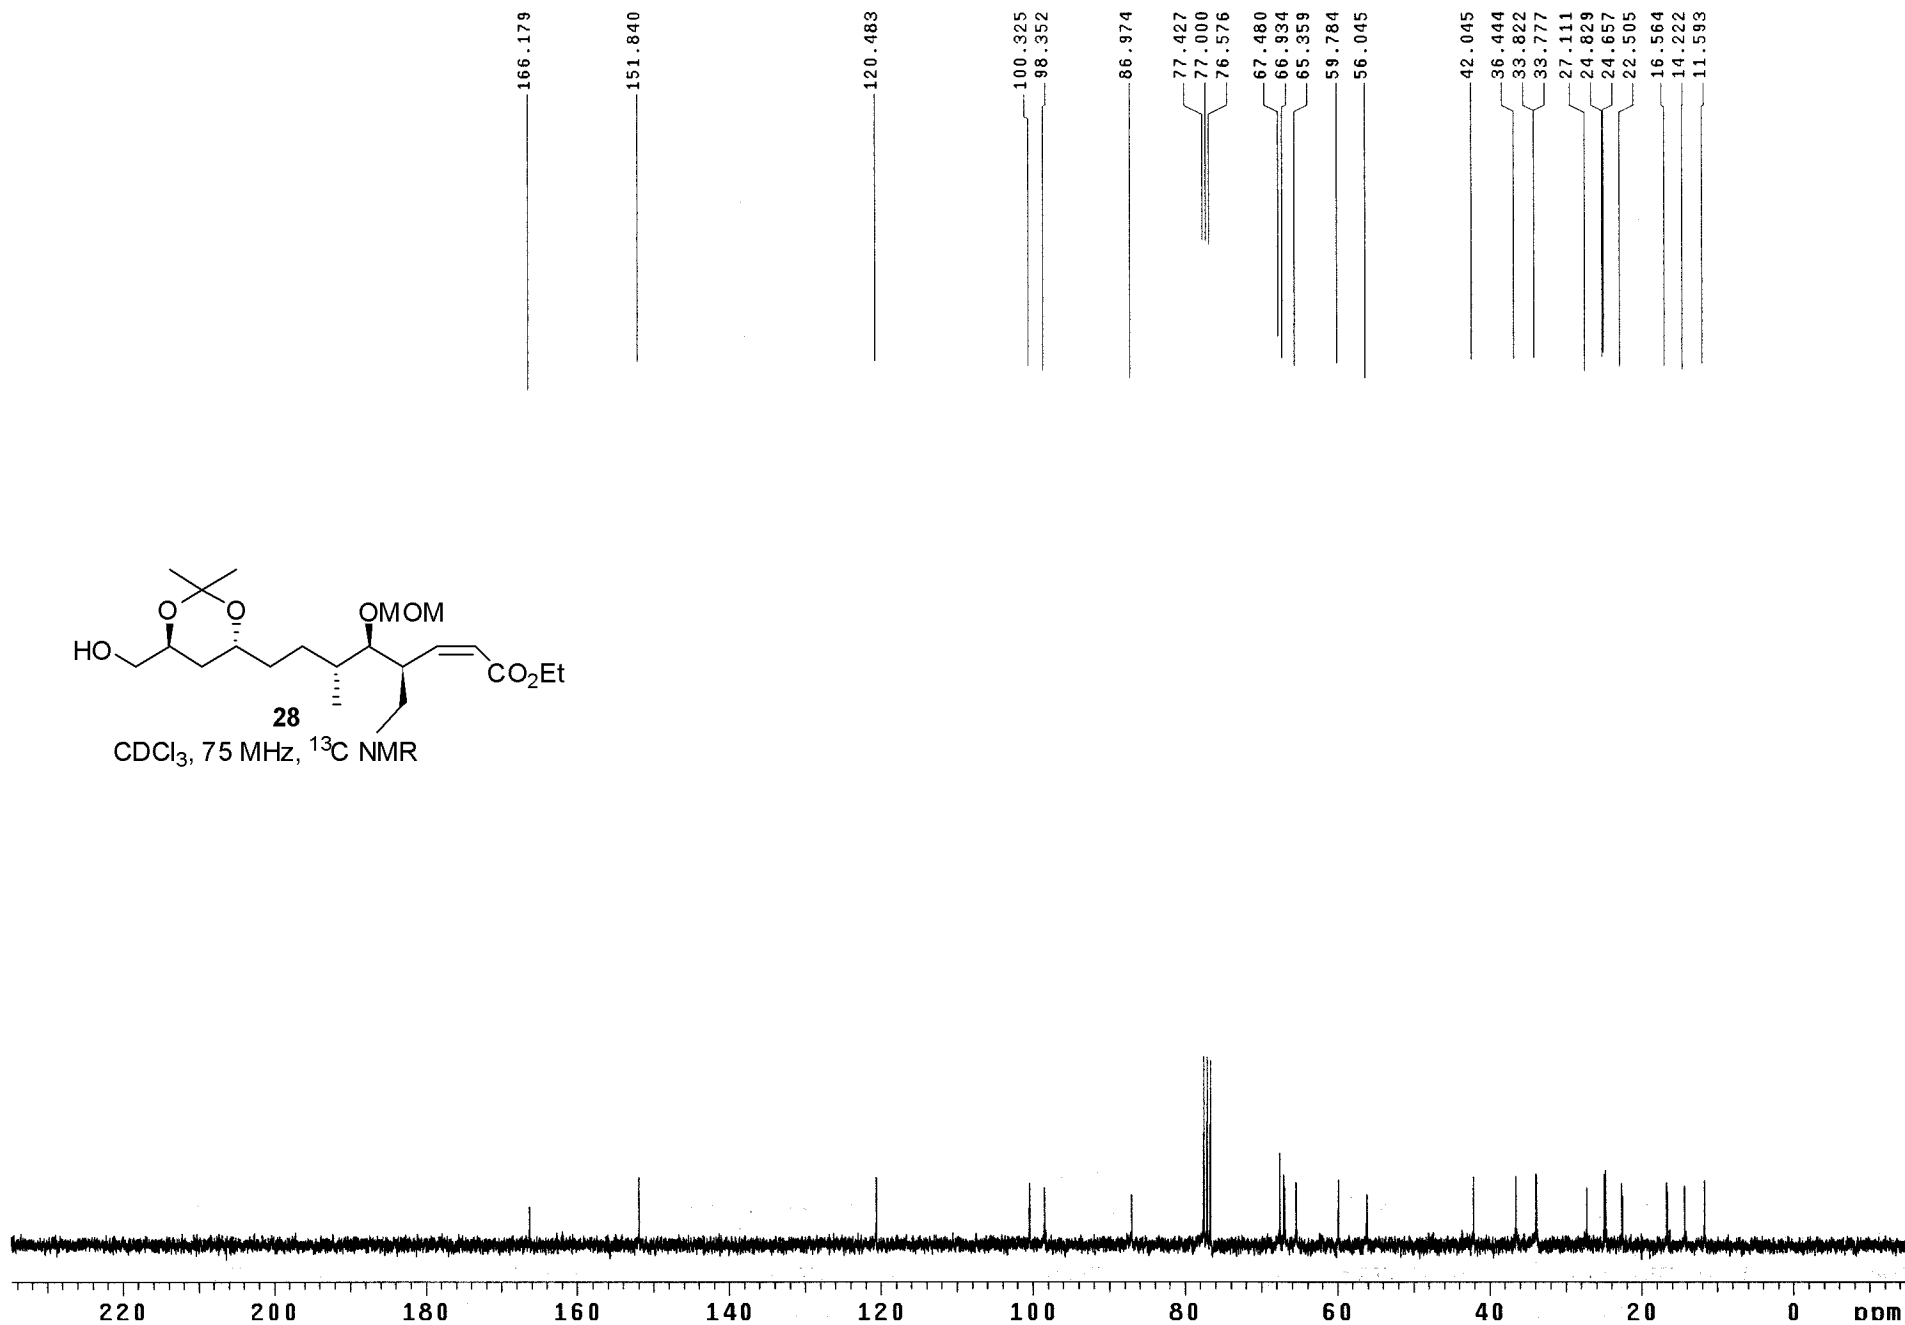

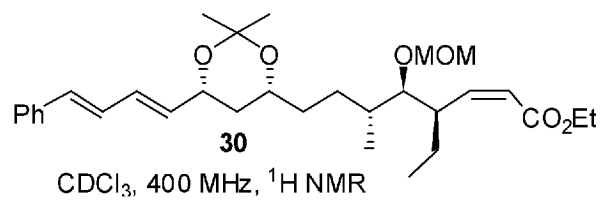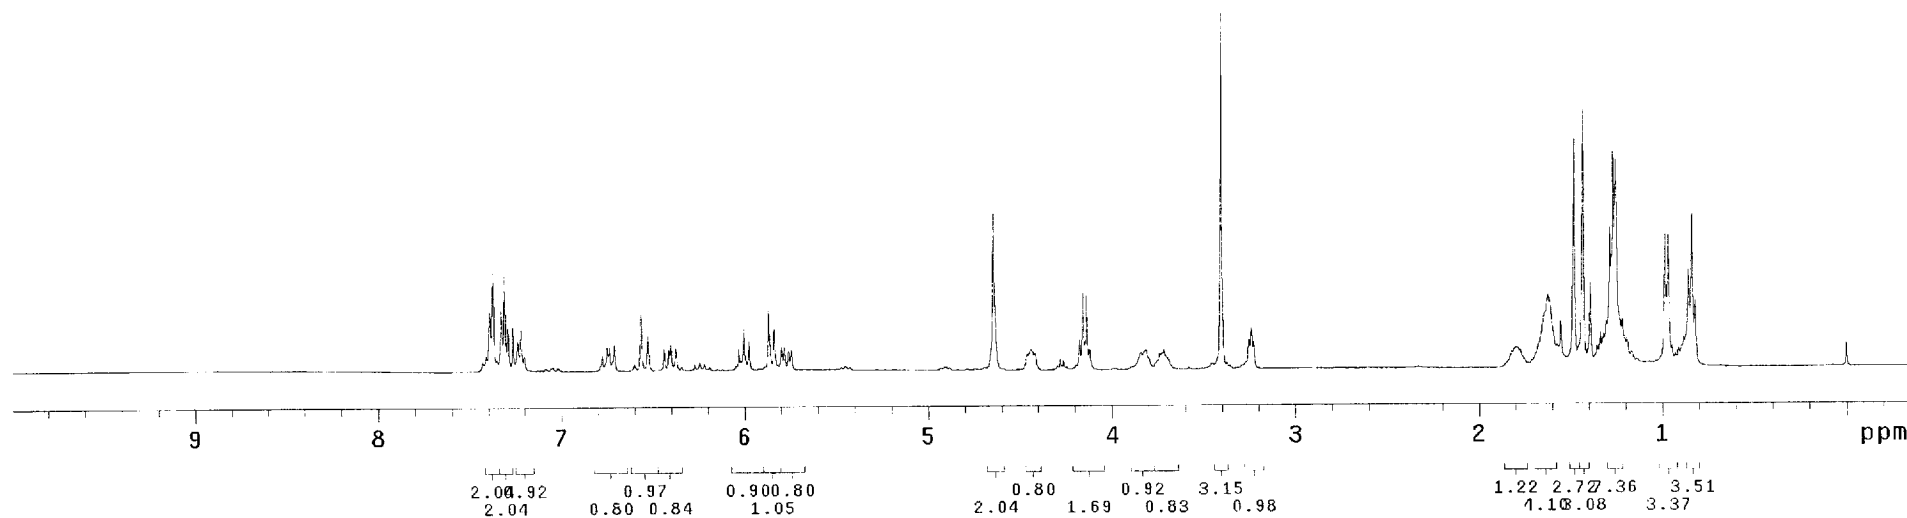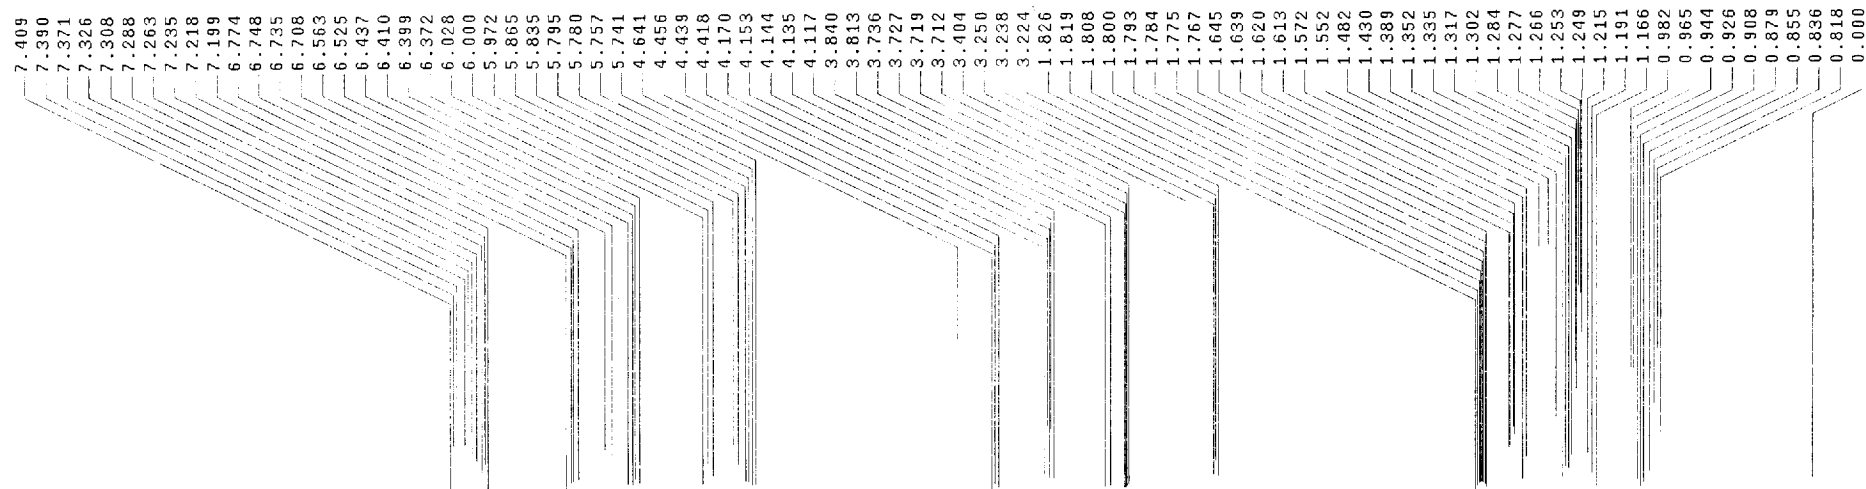

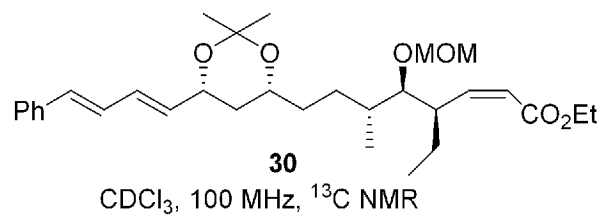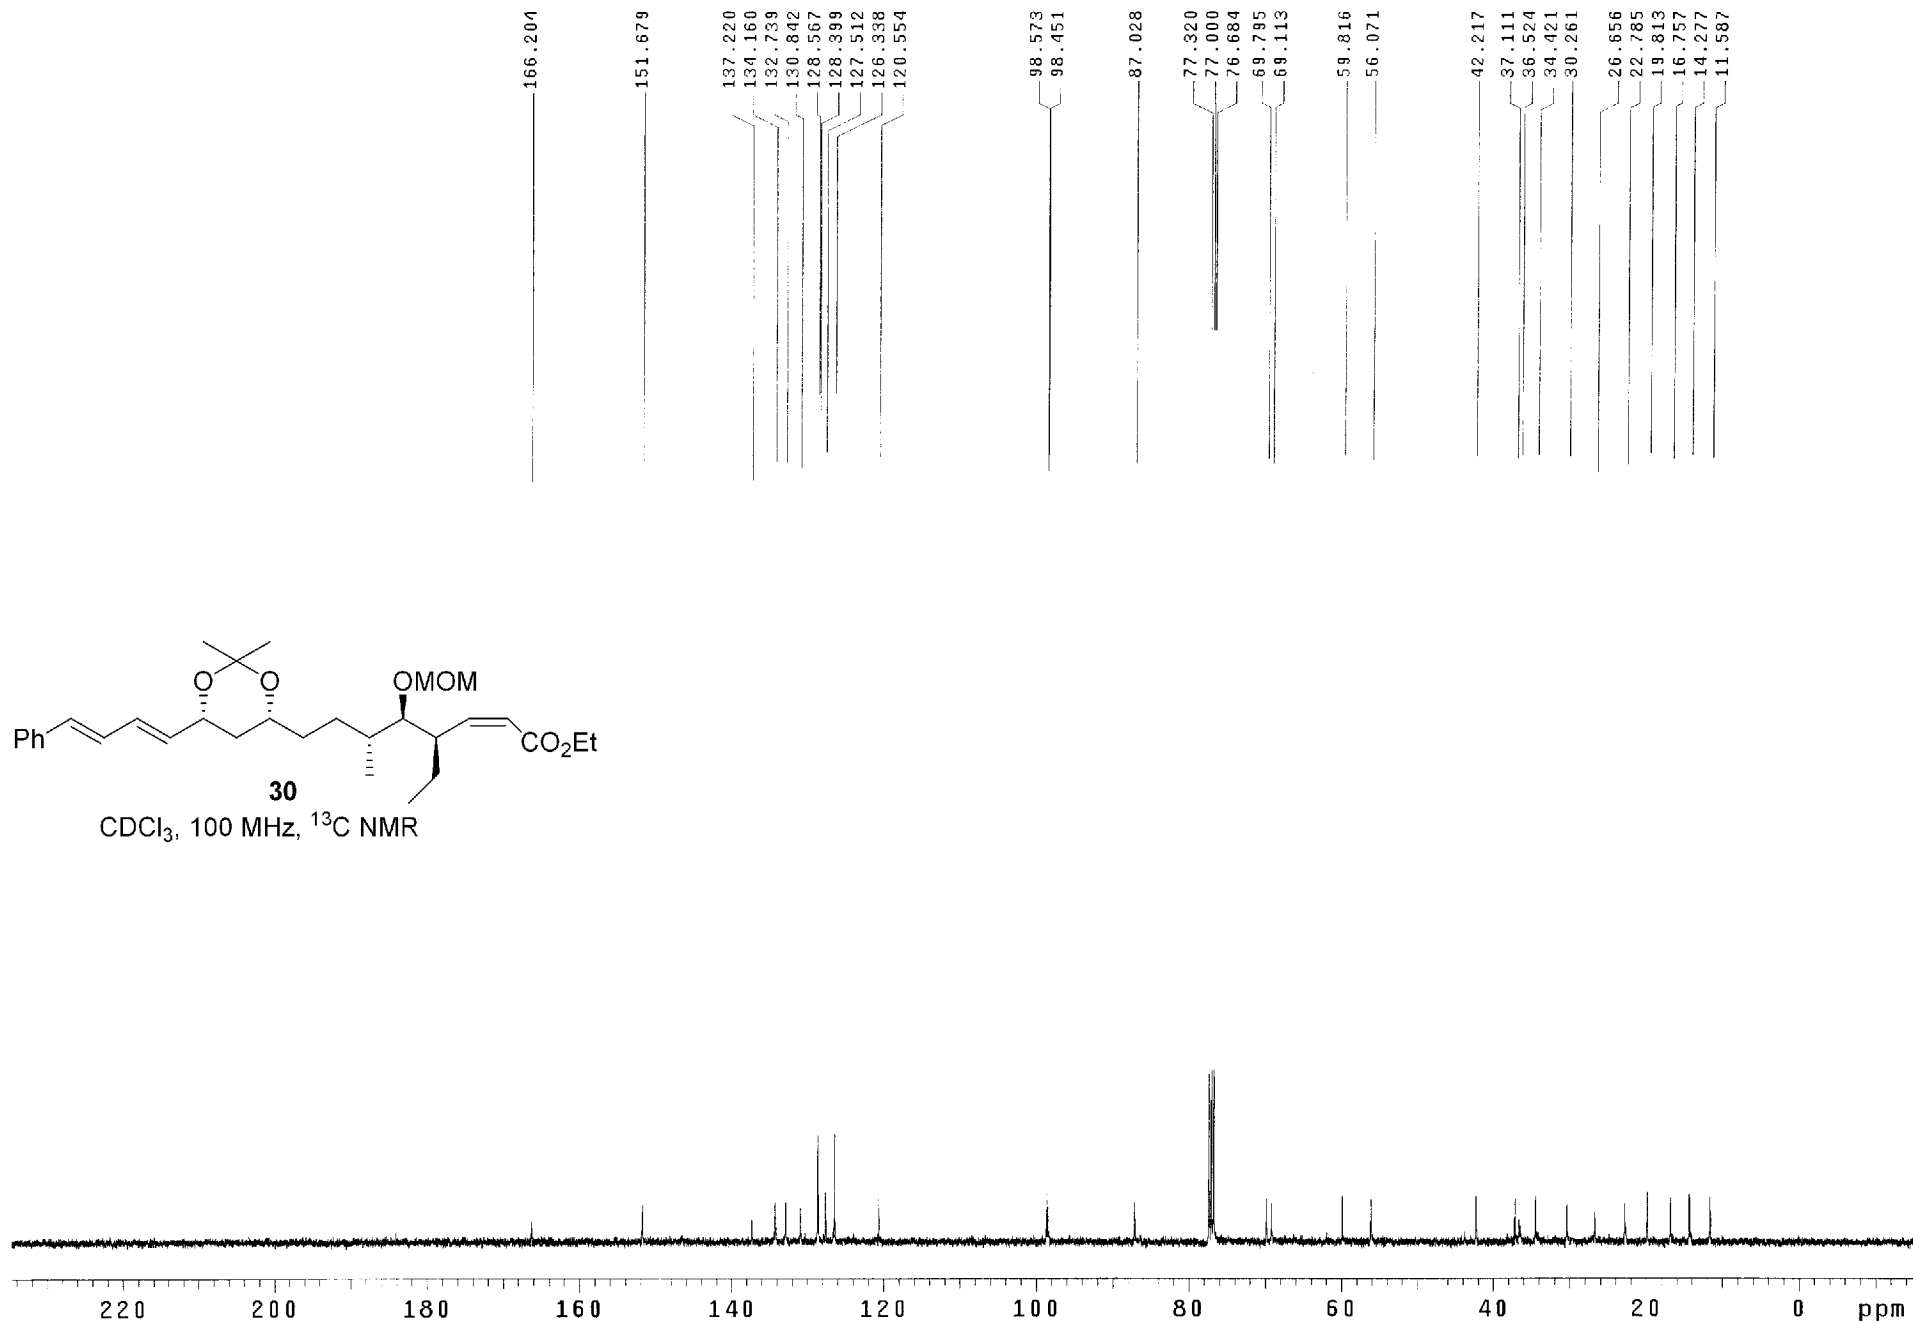

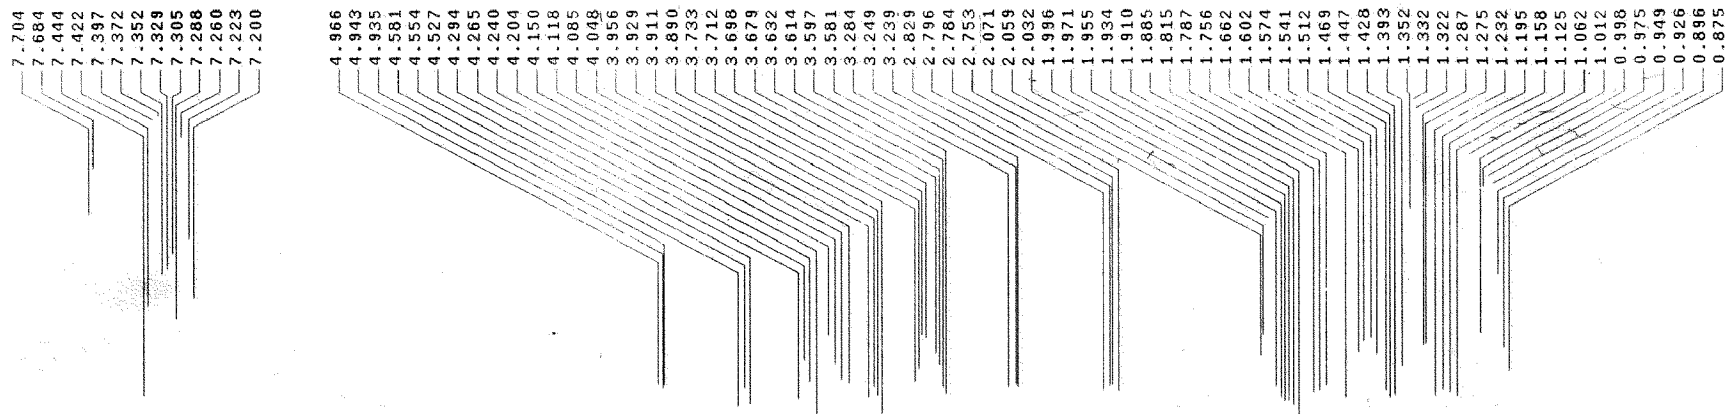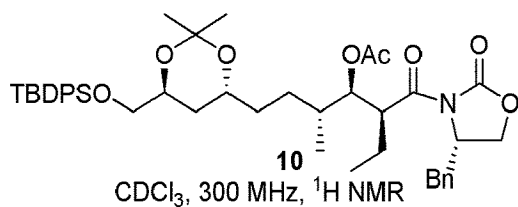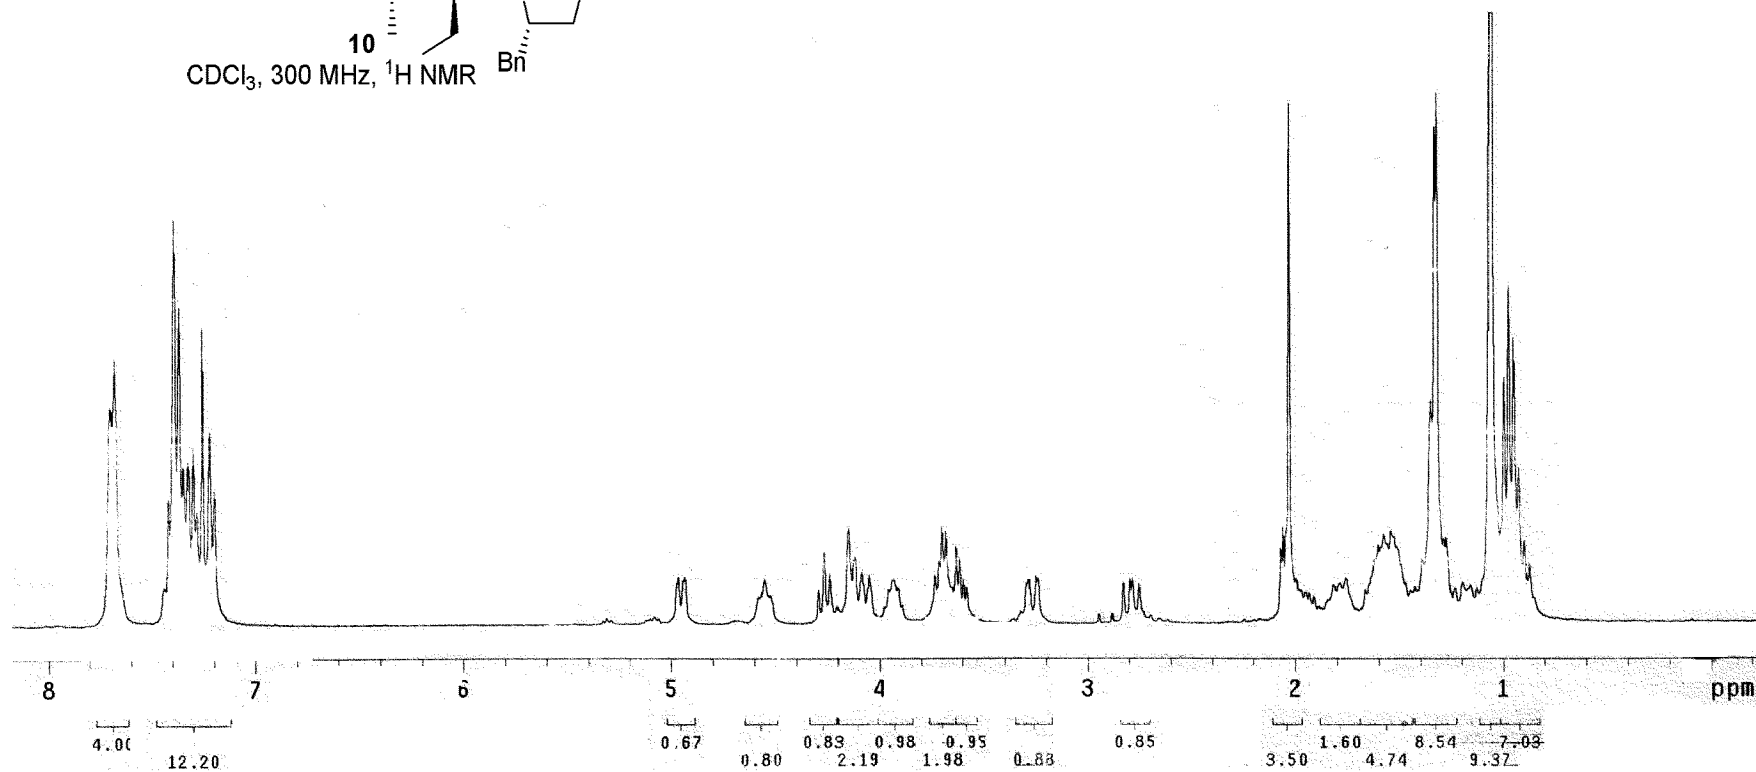

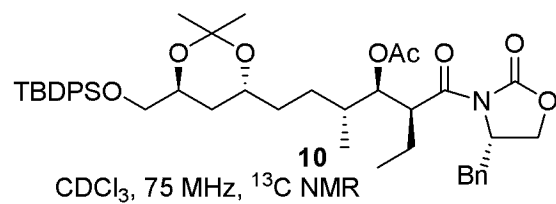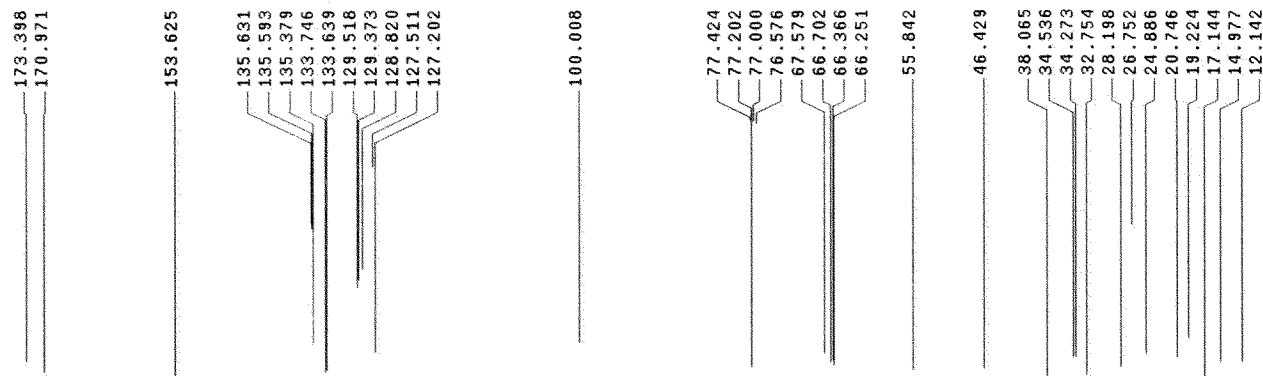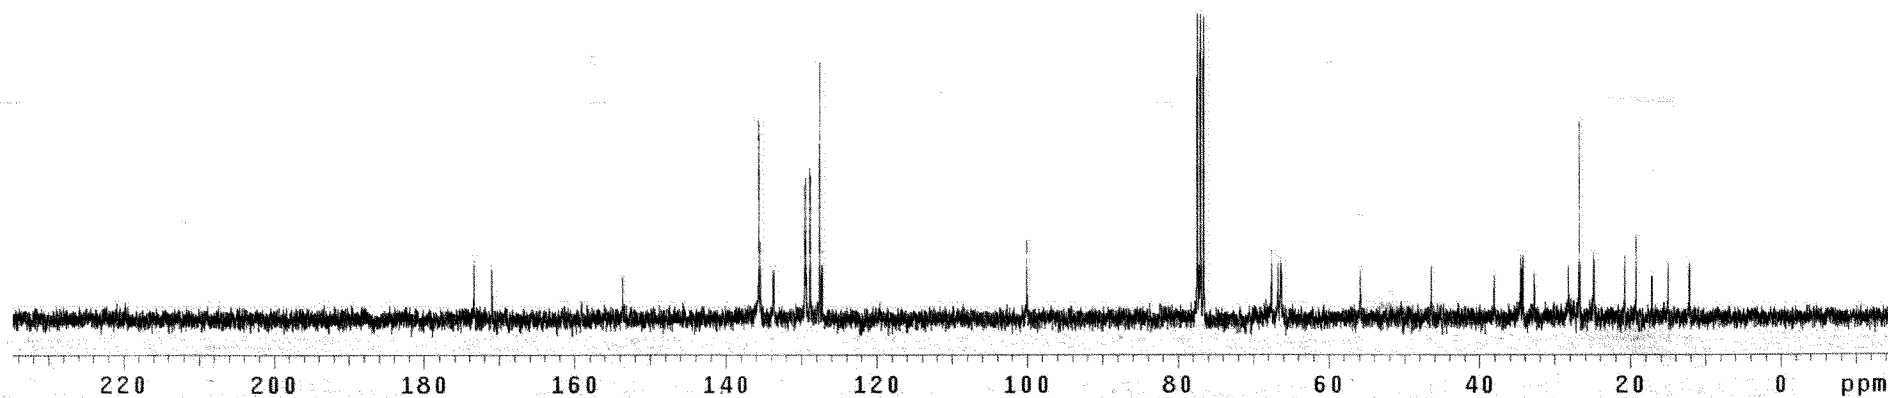

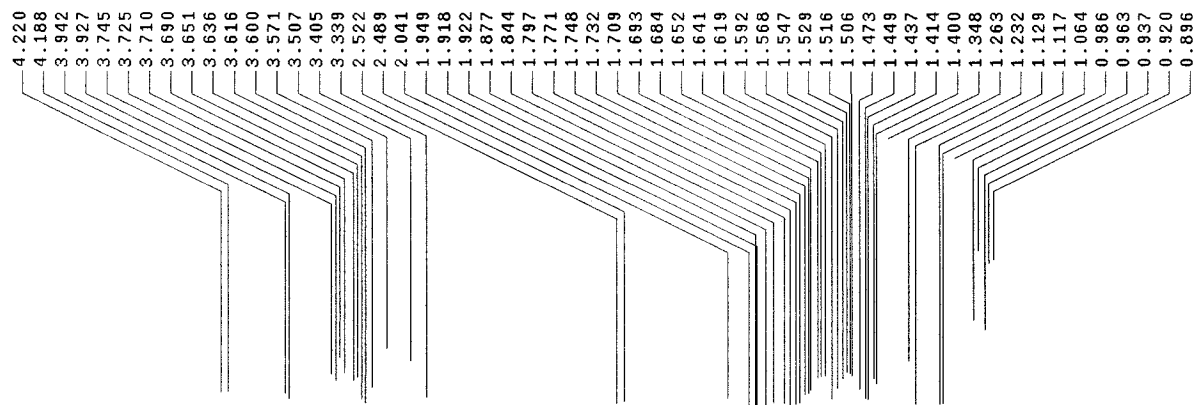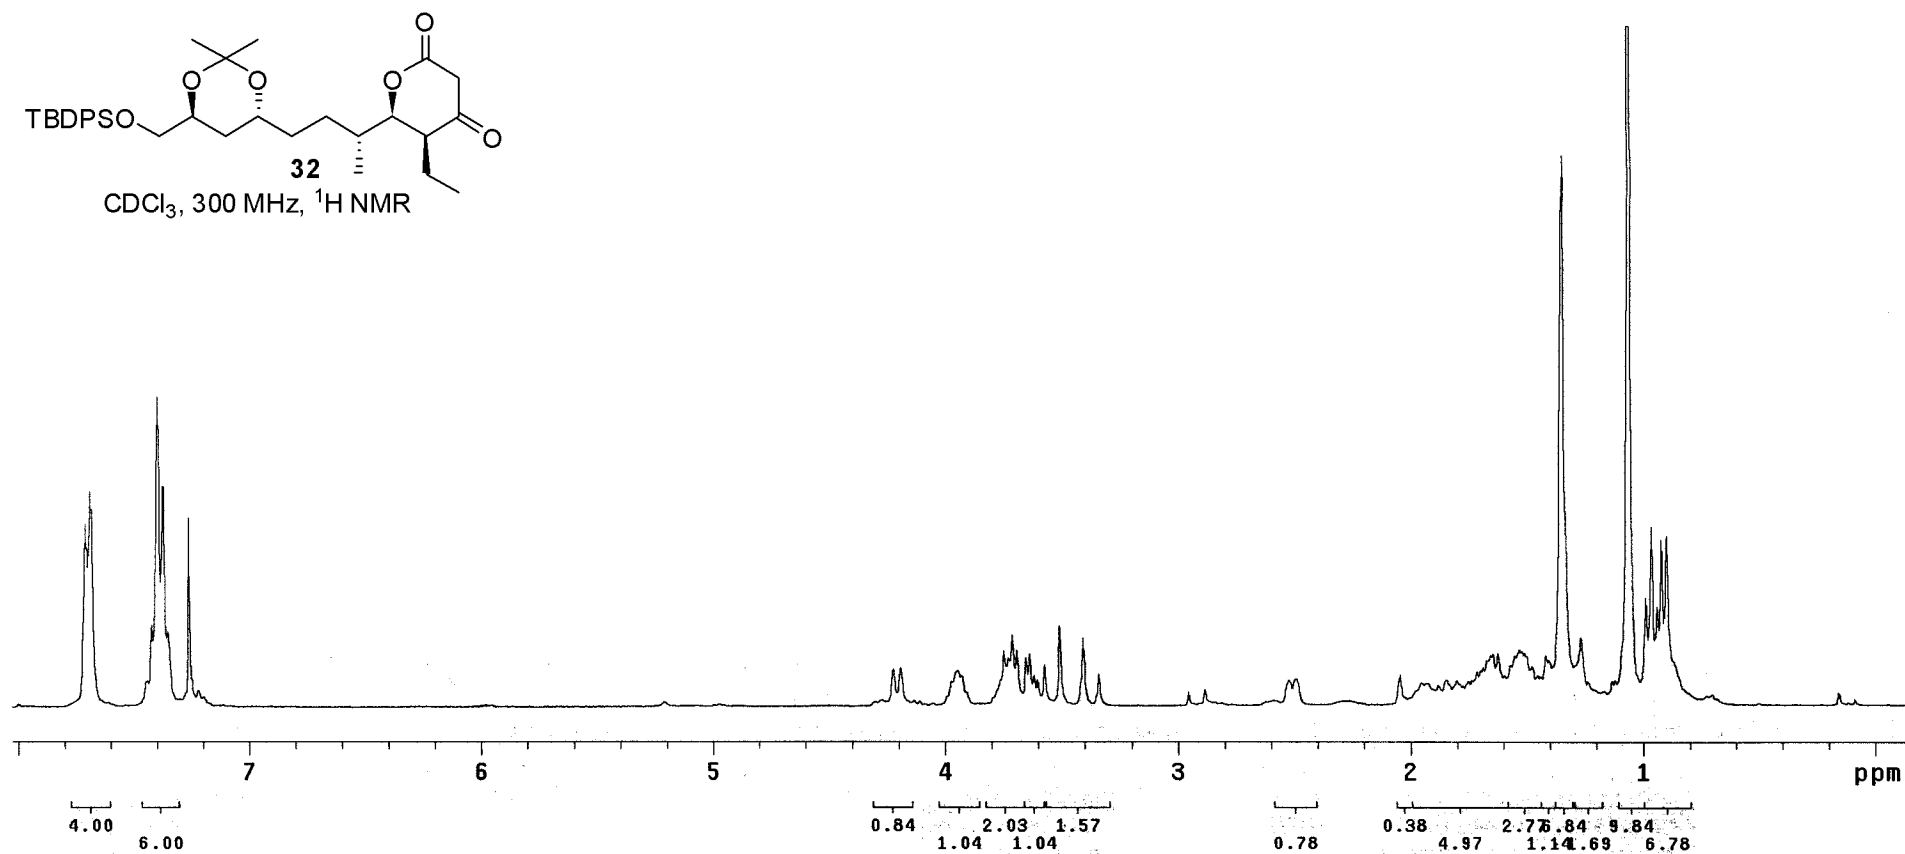

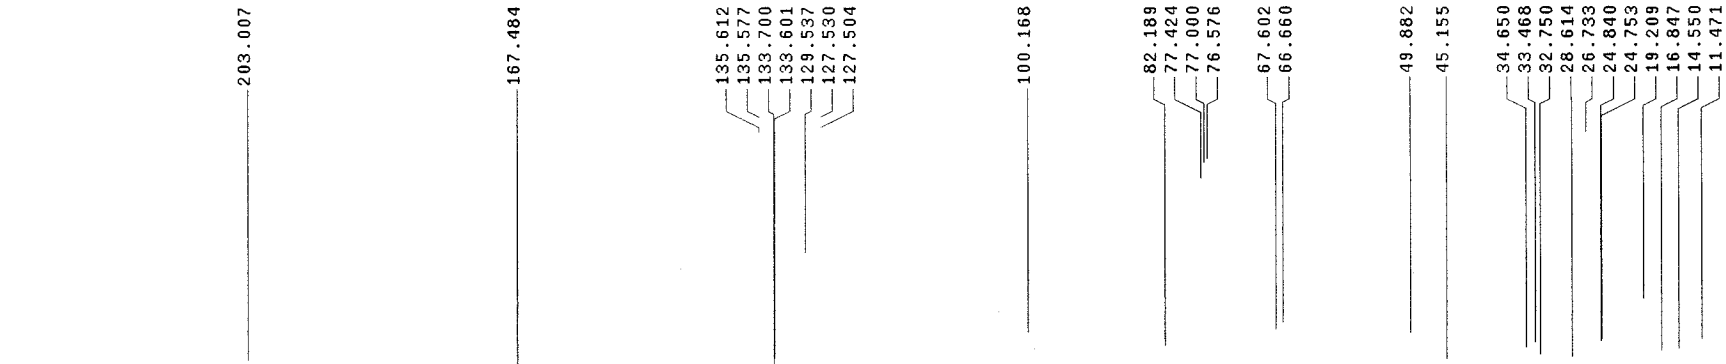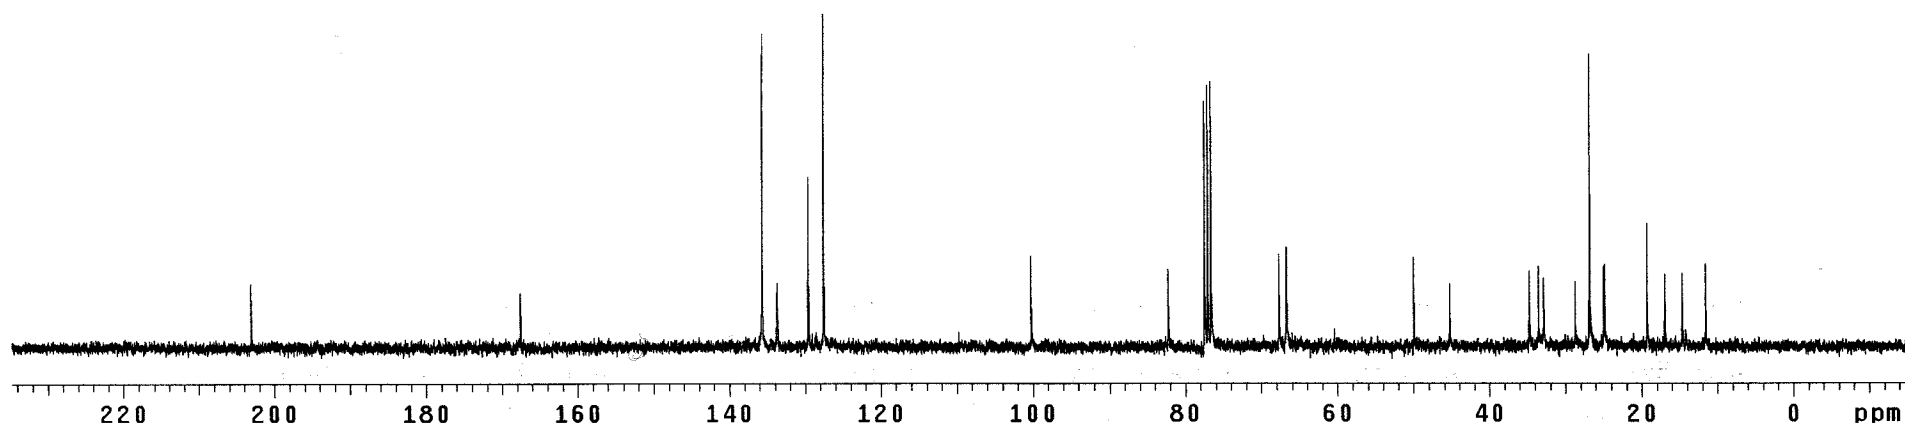

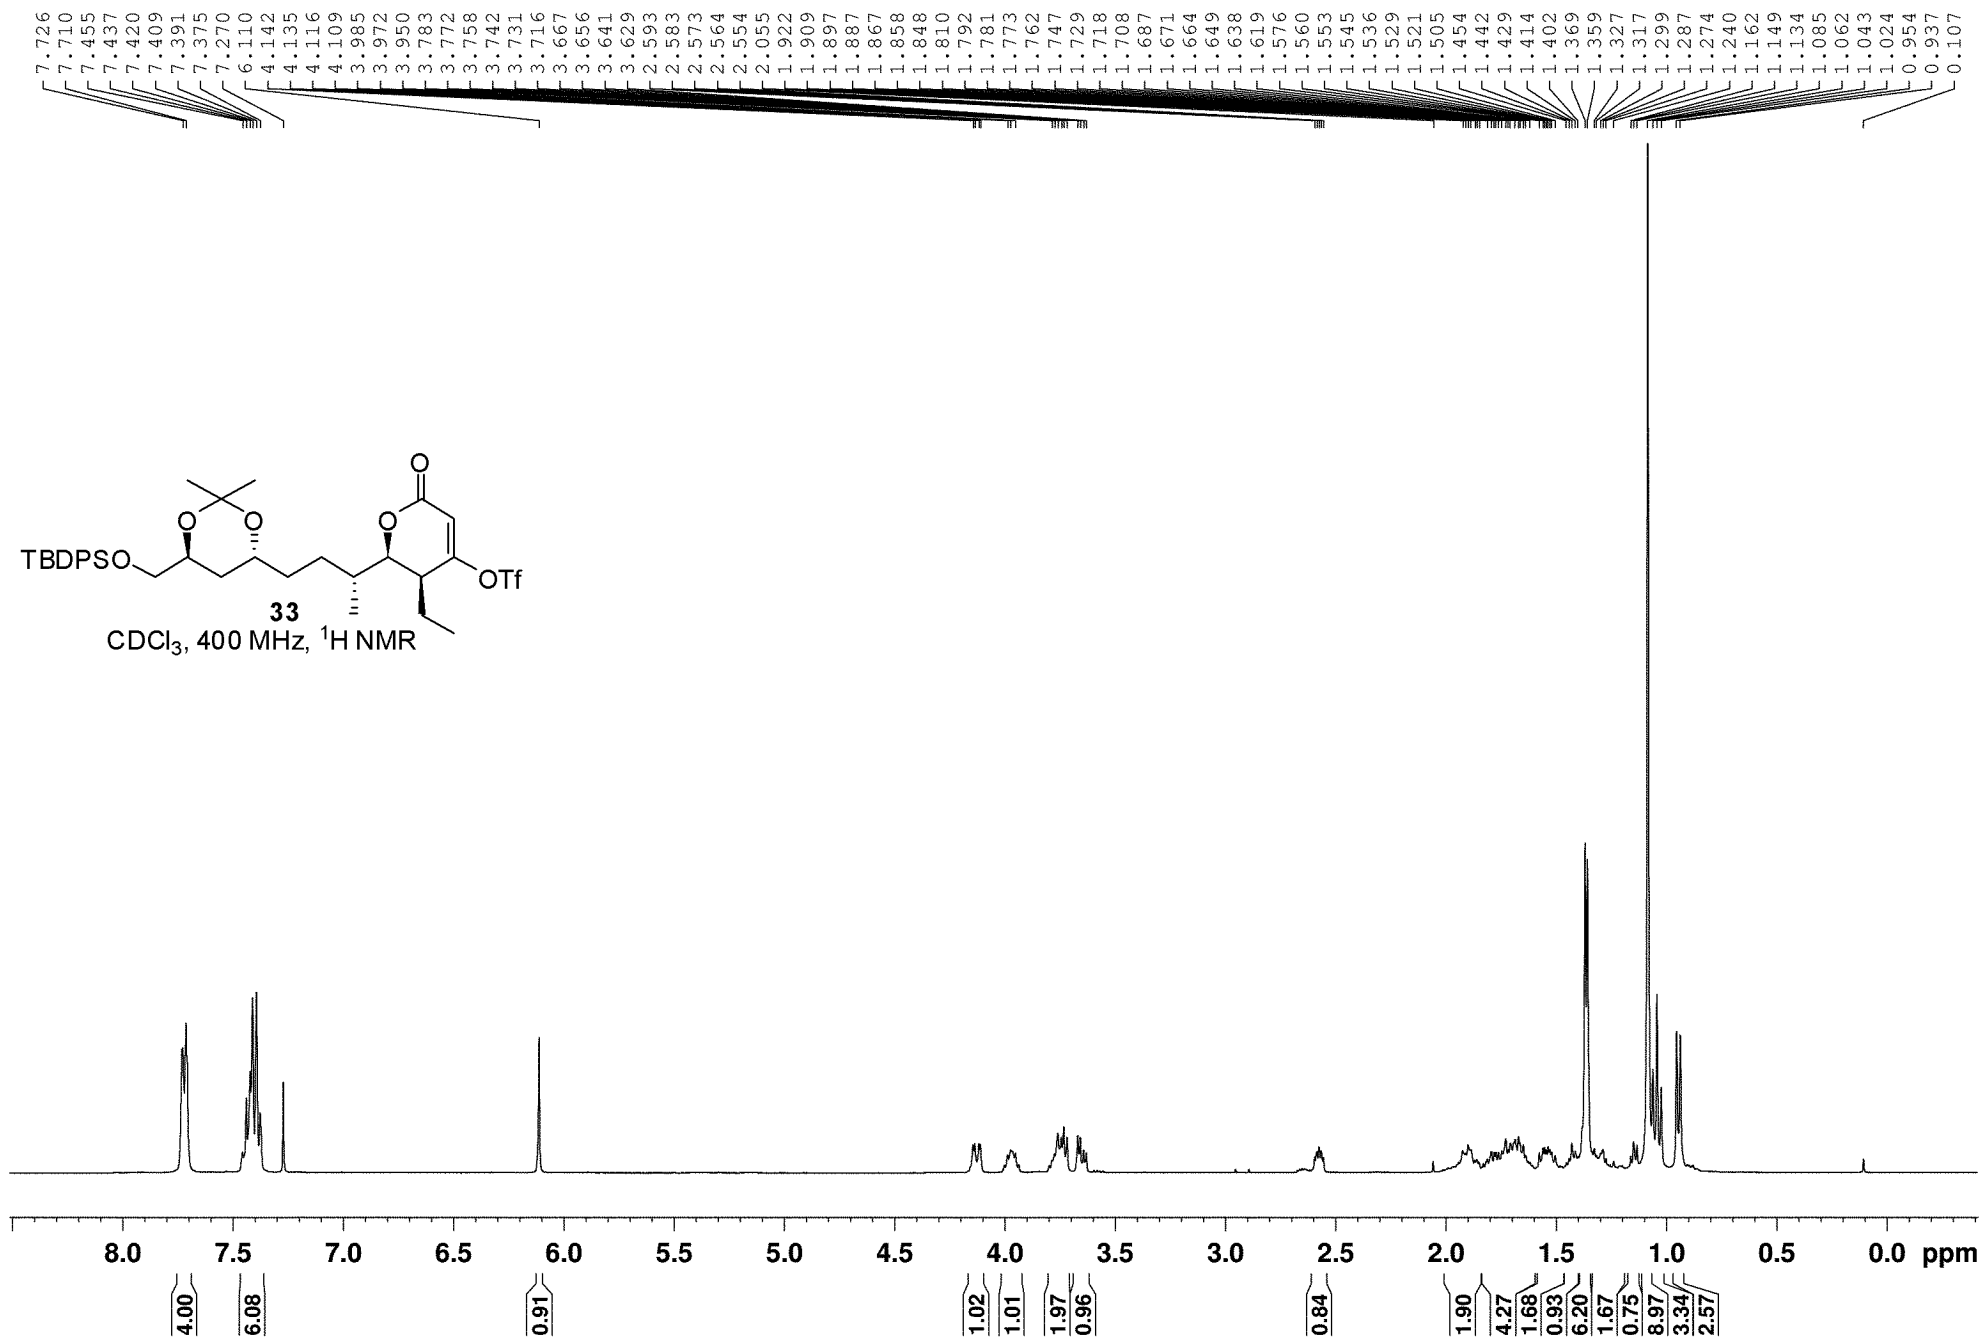



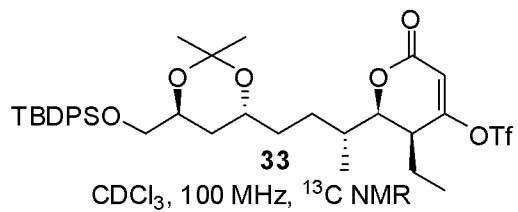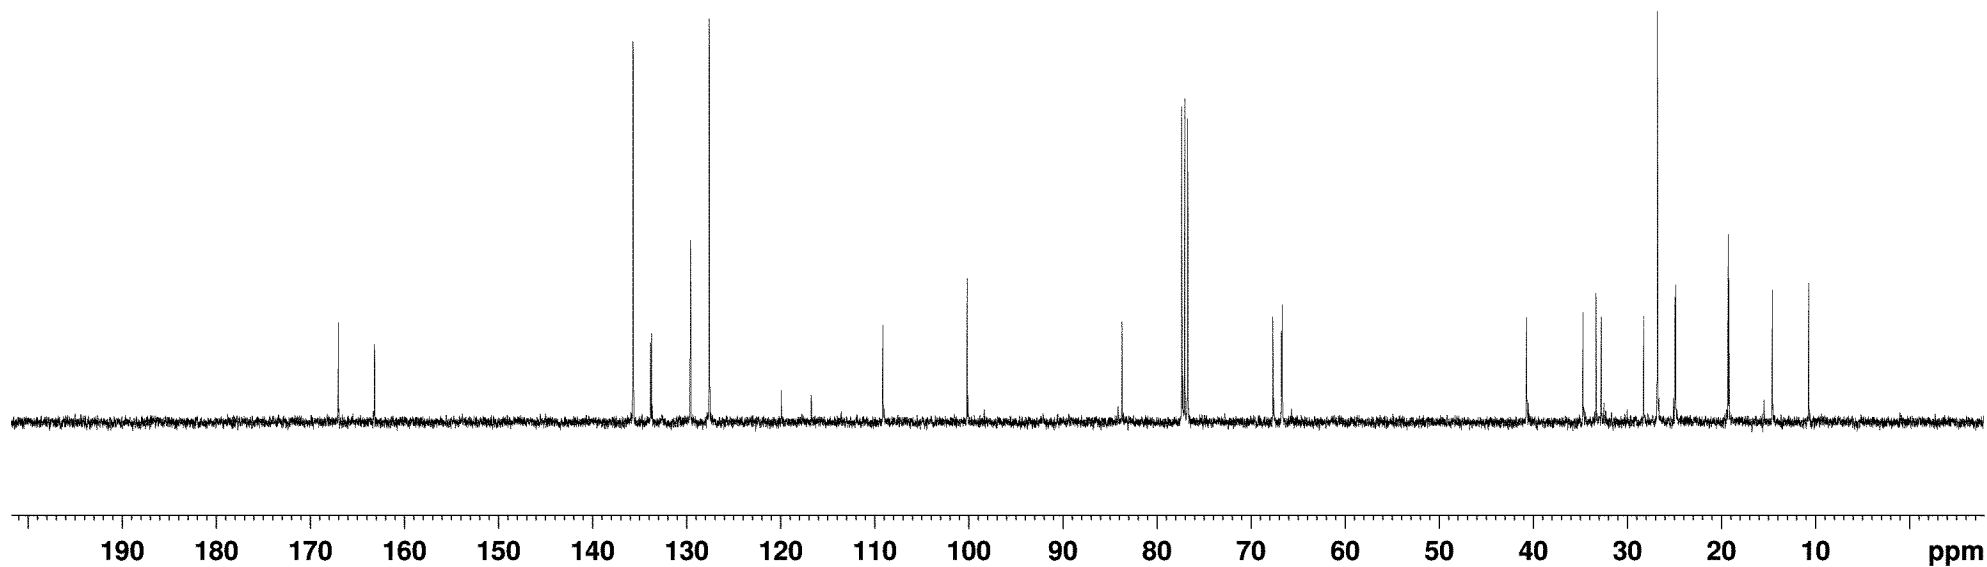

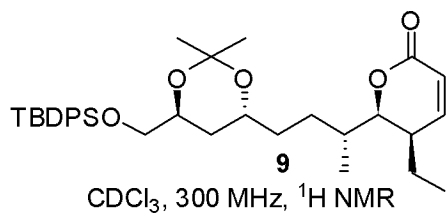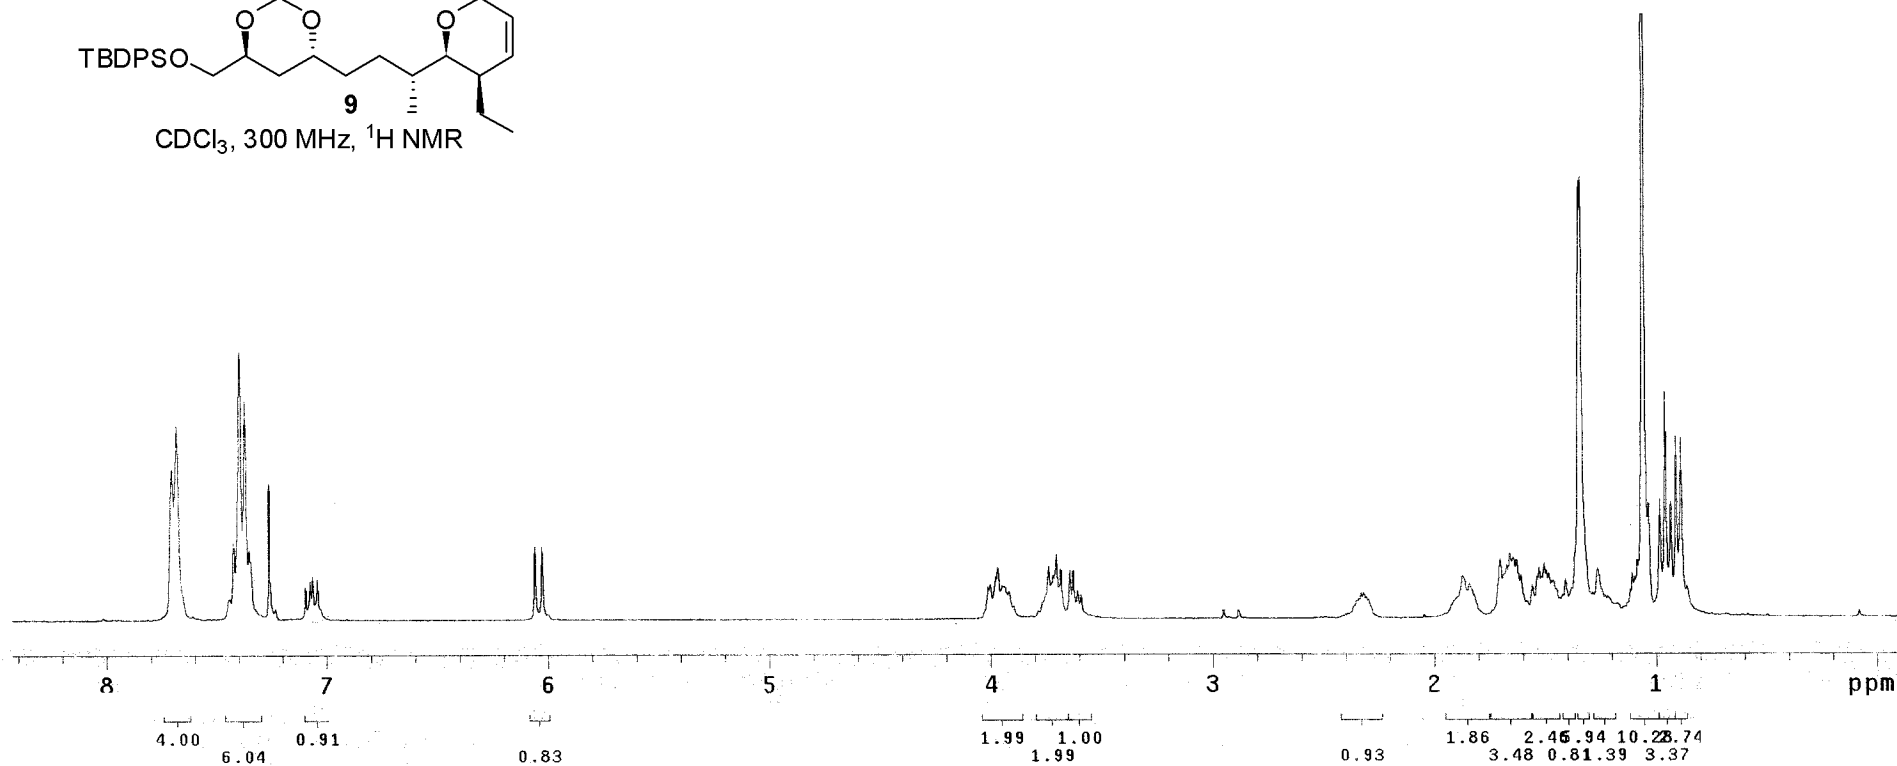

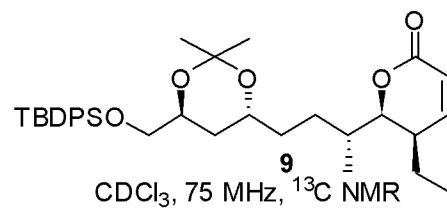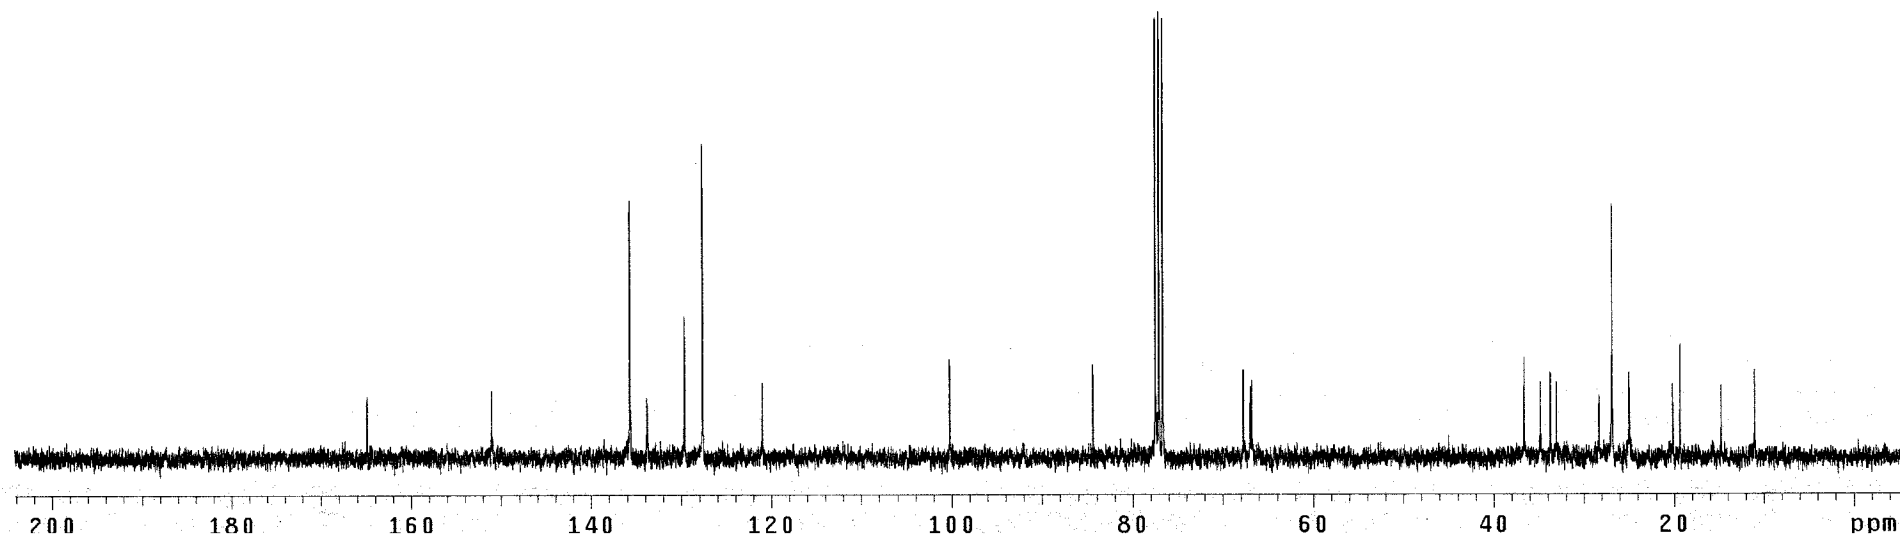

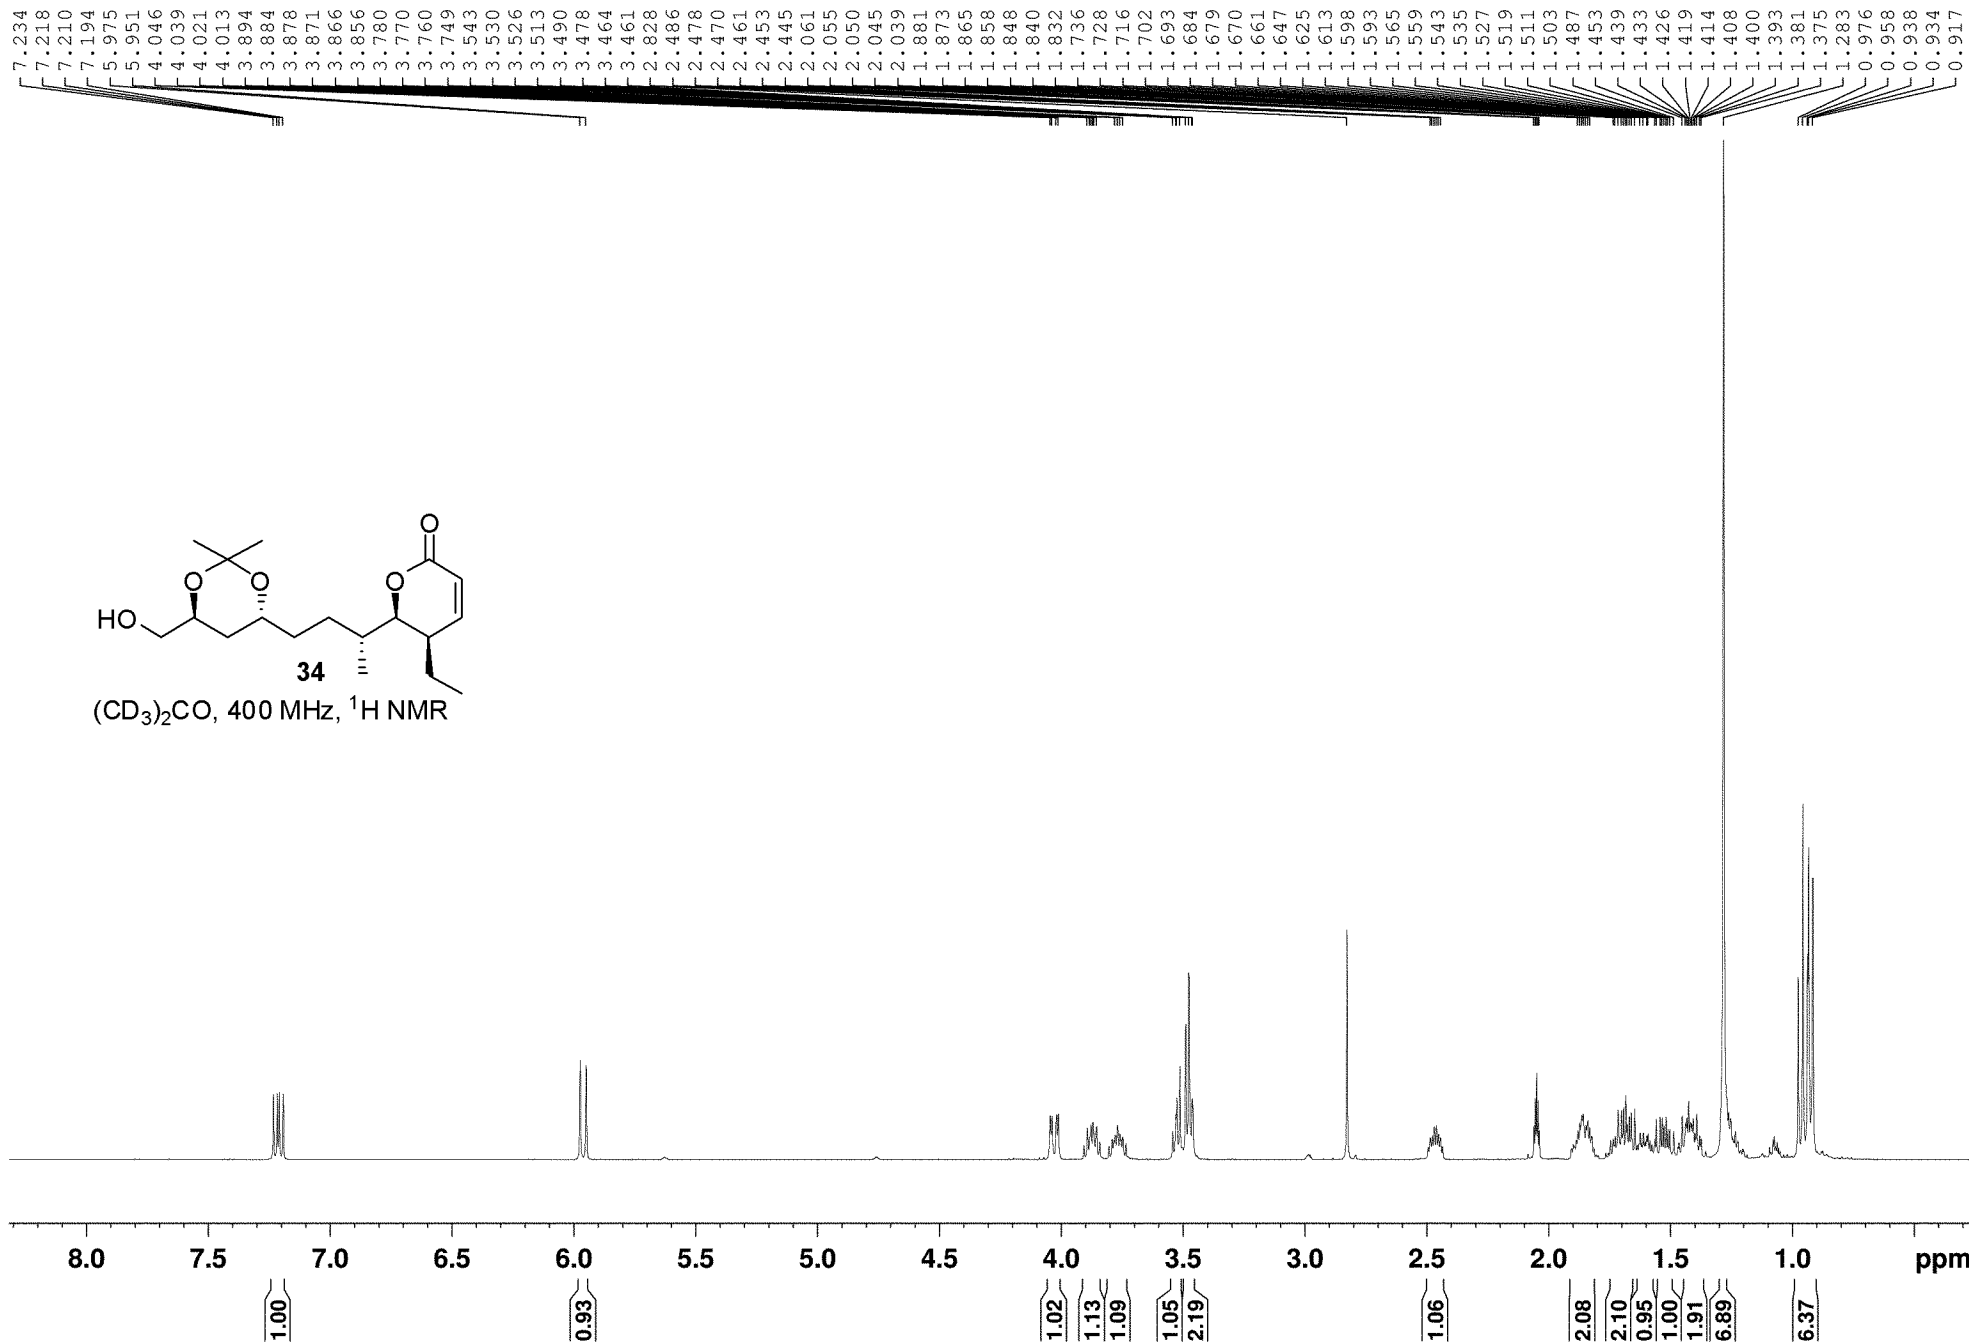

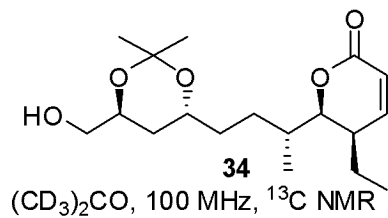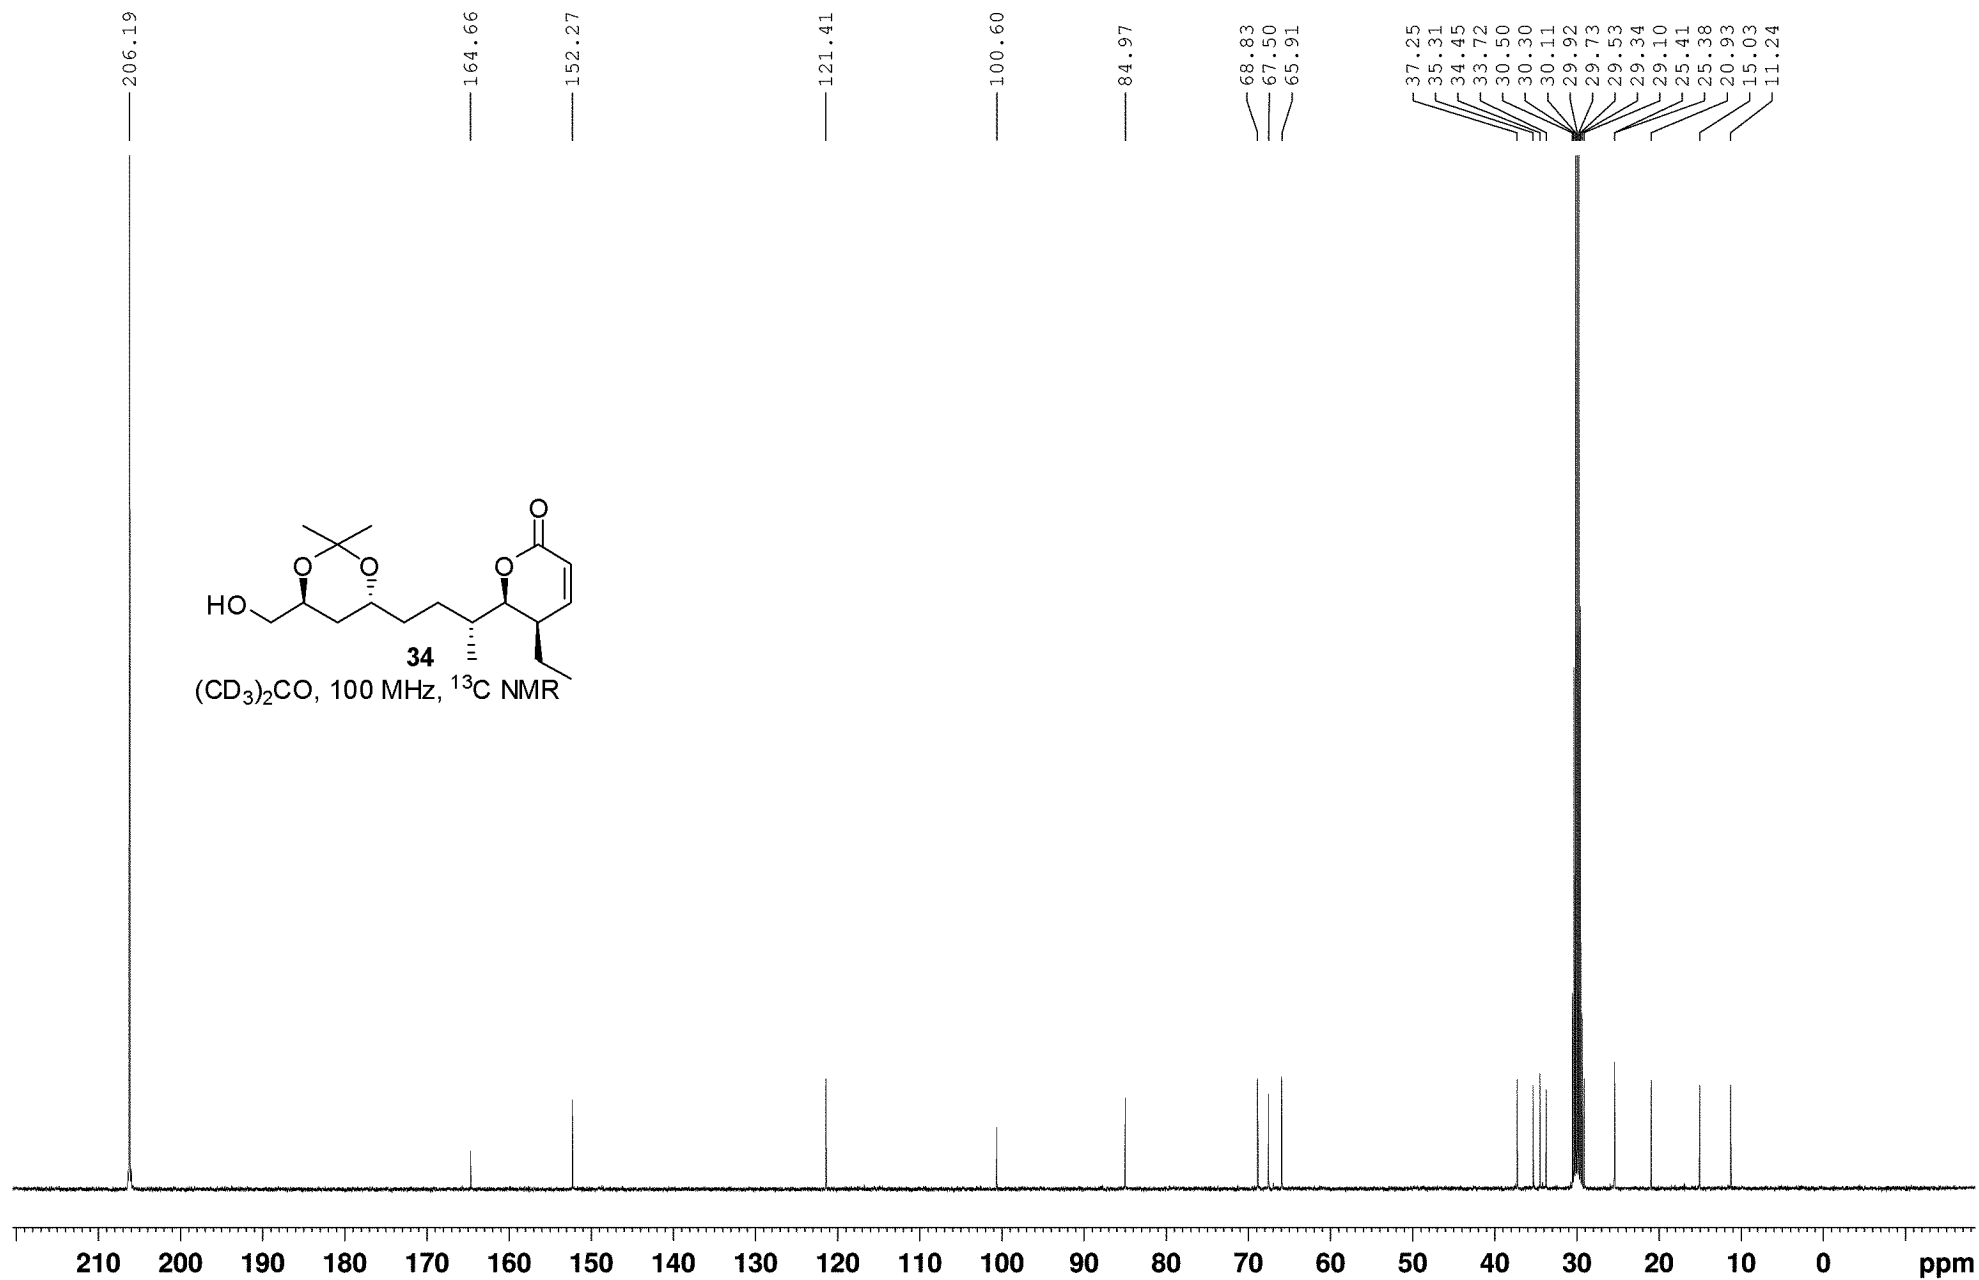

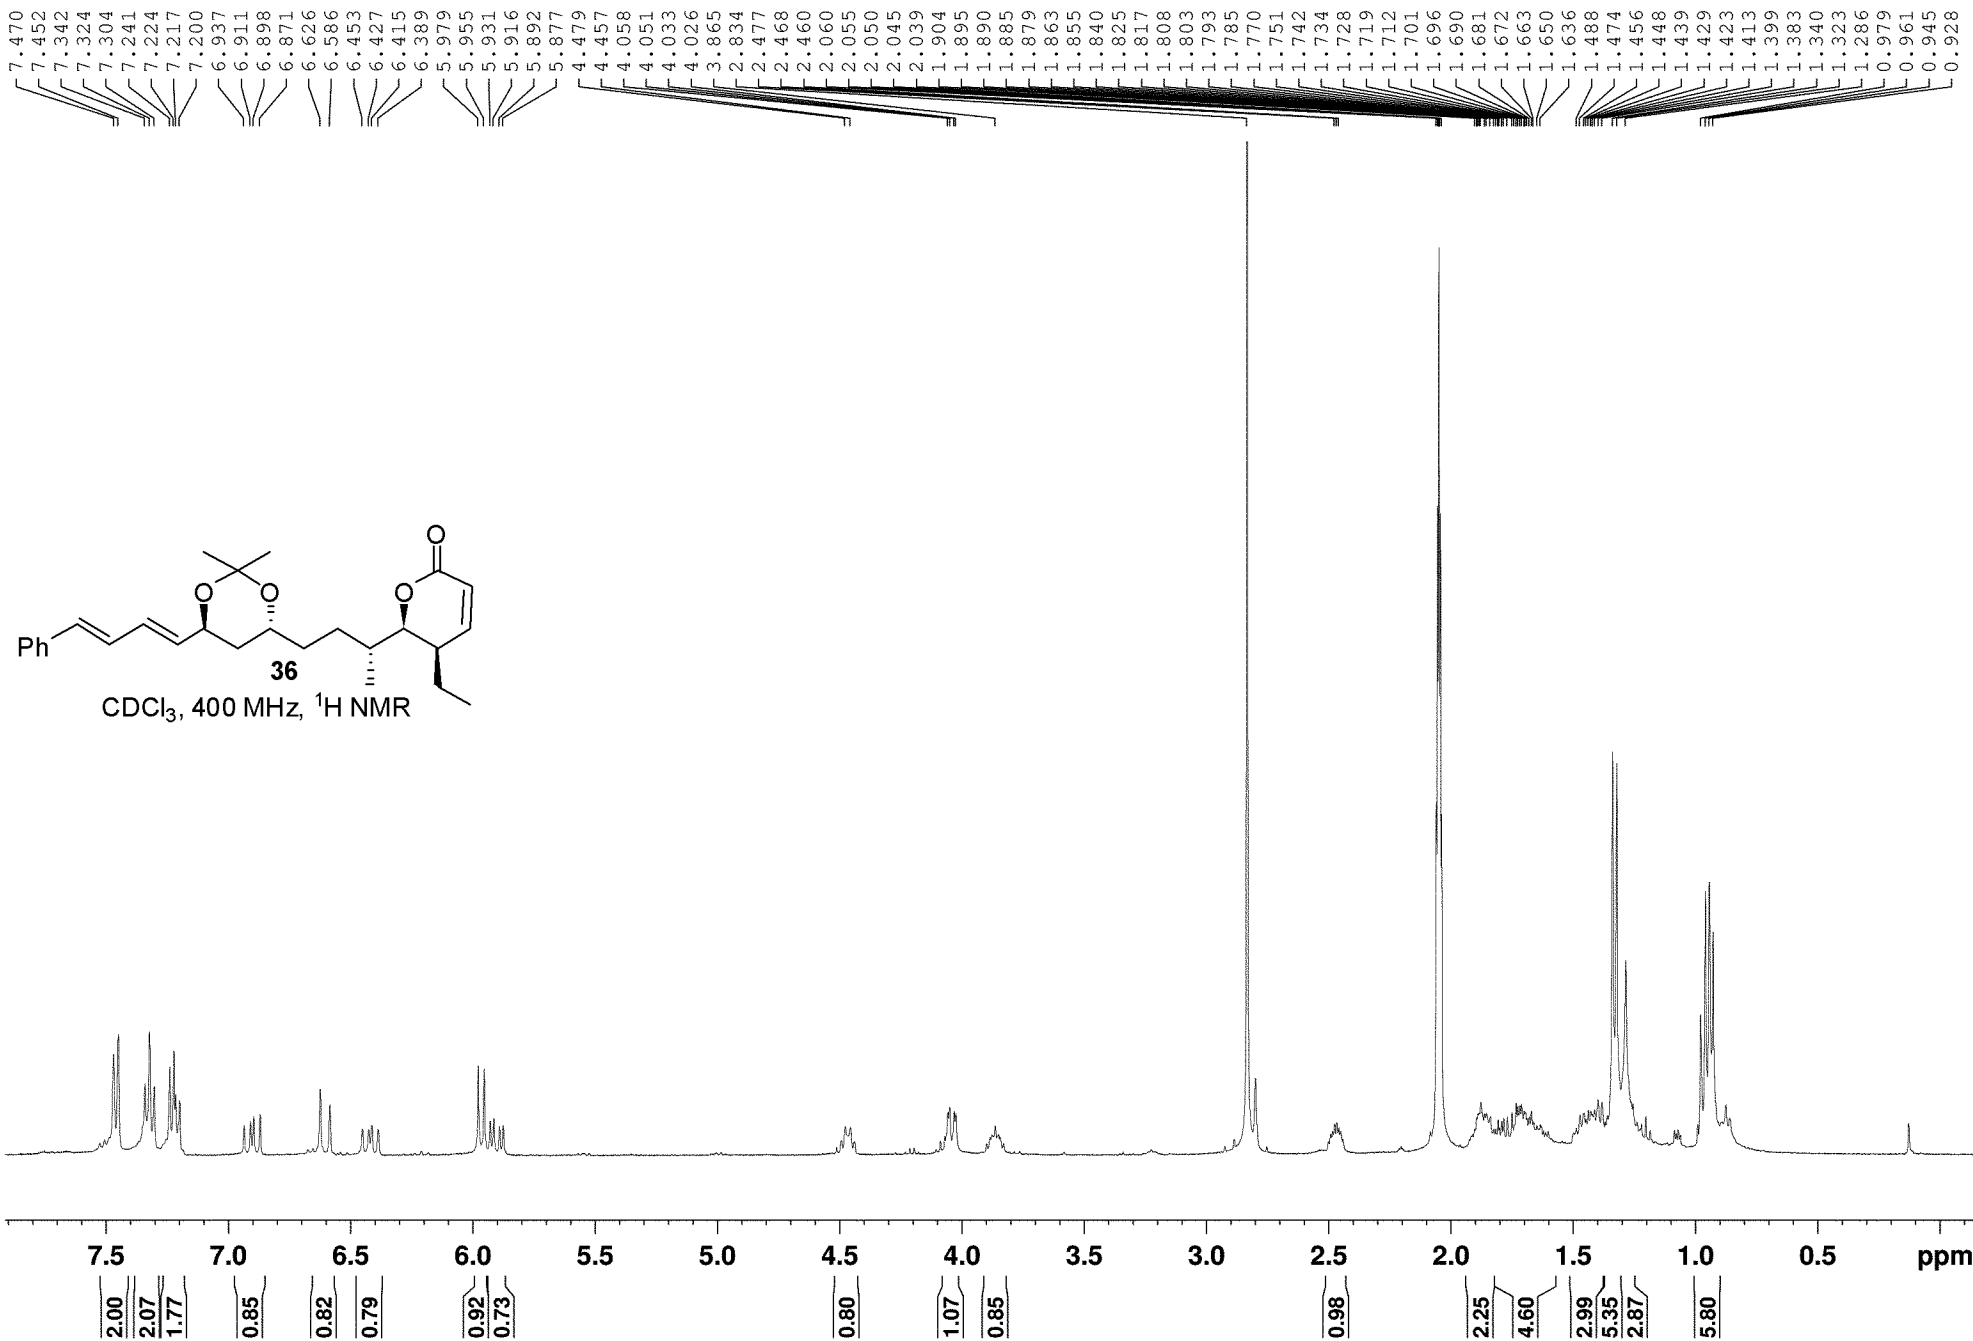

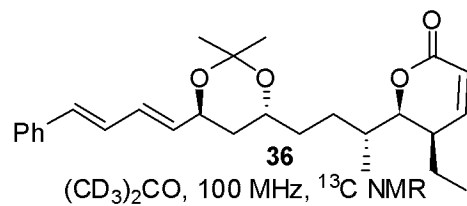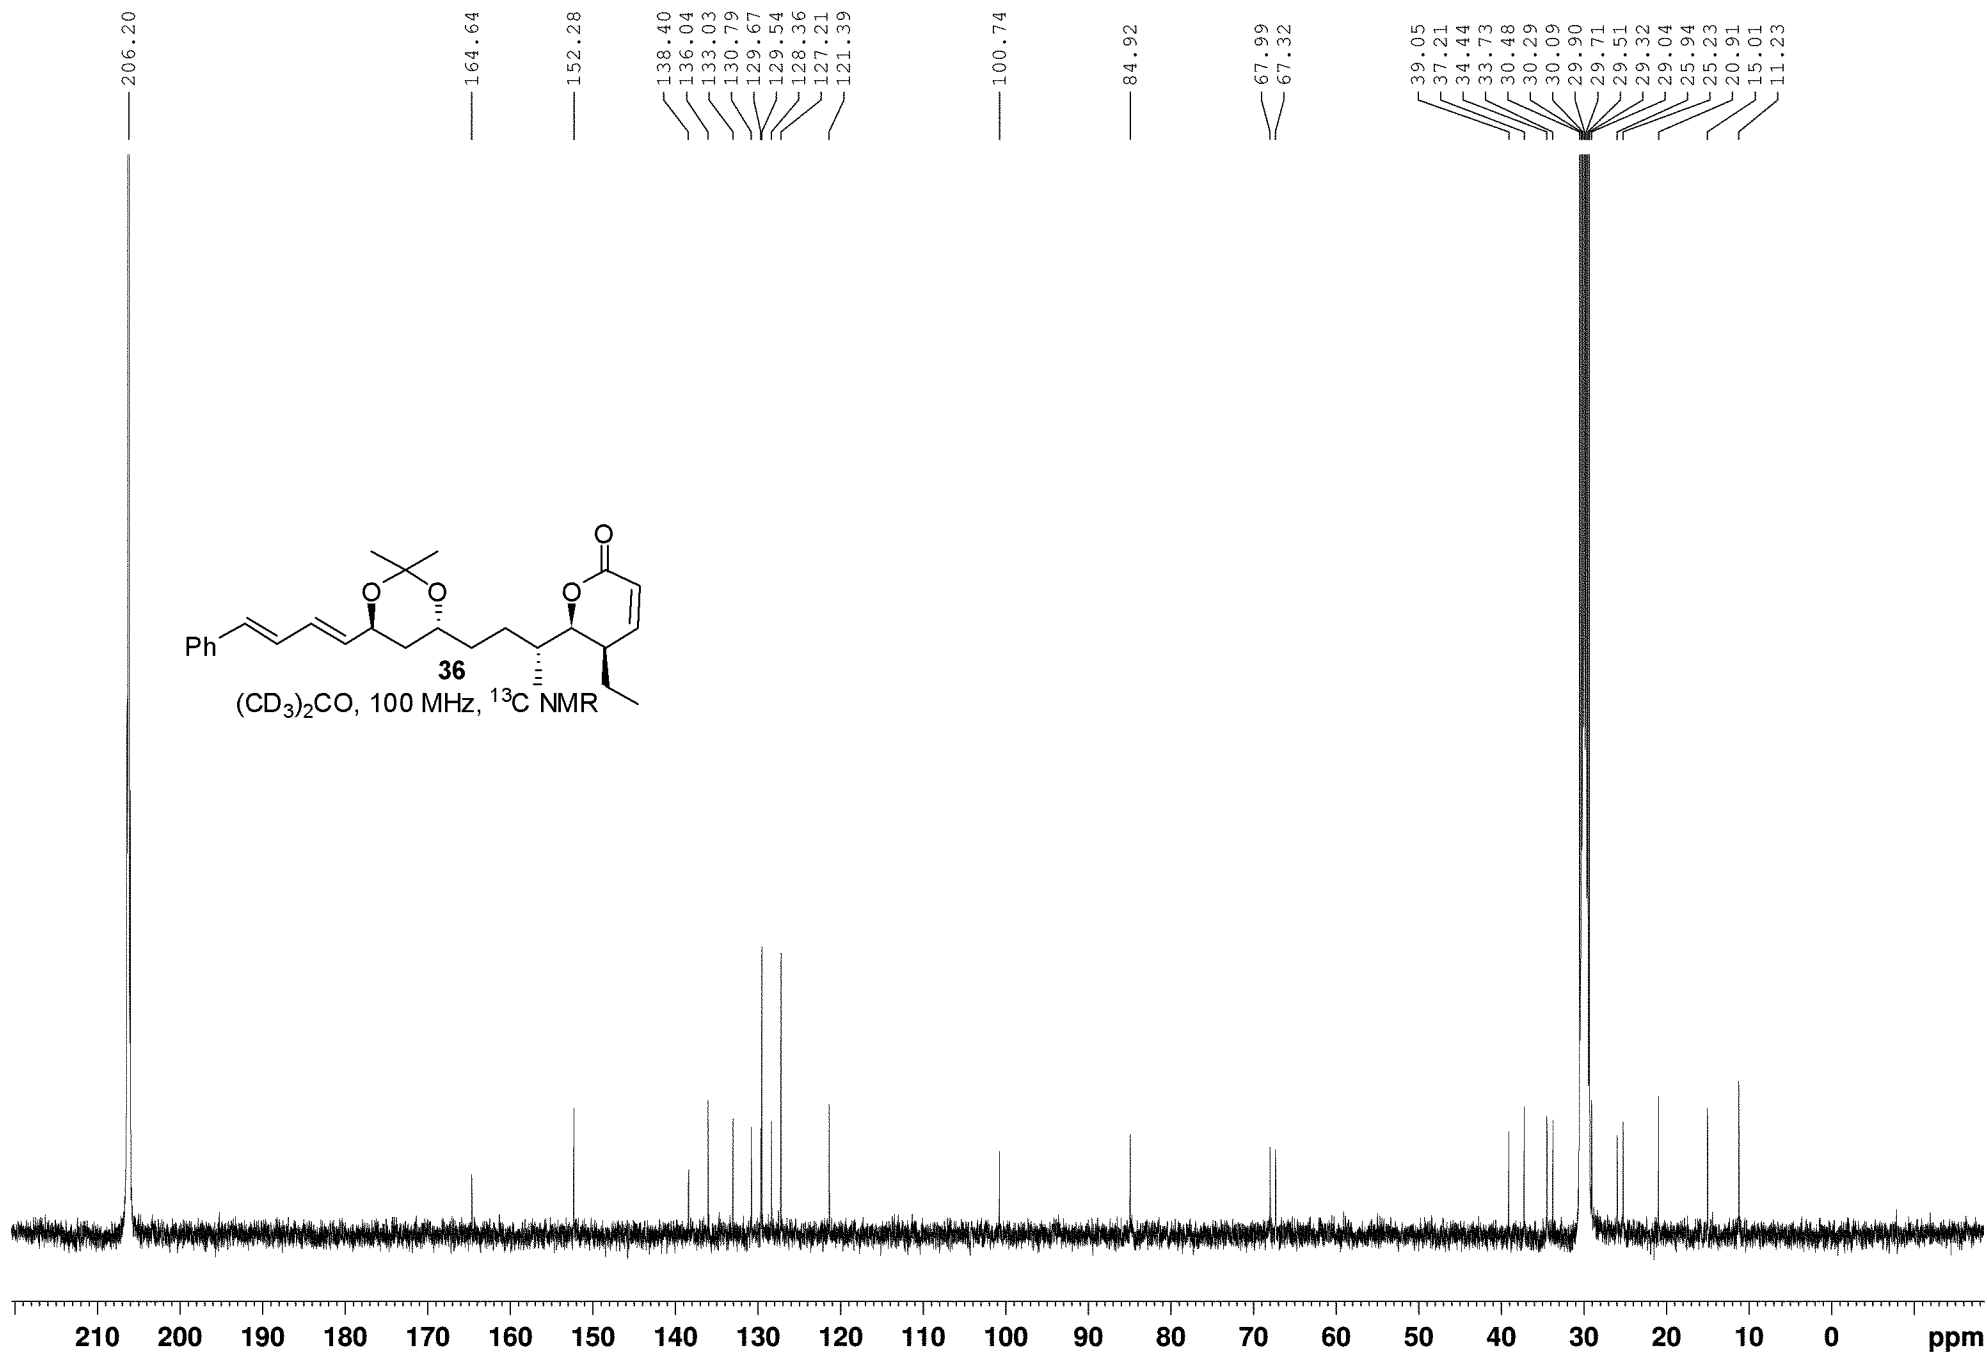

7.407  
7.389  
7.332  
7.313  
7.294  
7.262  
7.239  
7.221  
7.202  
7.097  
7.081  
7.073  
7.057  
6.817  
6.791  
6.778  
6.752  
6.580  
6.541  
6.491  
6.464  
6.453  
6.426  
6.057  
6.033  
5.923  
5.908  
5.885  
5.870  
4.599  
4.588  
4.020  
4.013  
3.994  
3.987  
3.974  
2.346  
2.337  
2.328  
2.320  
2.312  
1.962  
1.942  
1.933  
1.914  
1.889  
1.868  
1.850  
1.838  
1.828  
1.802  
1.792  
1.780  
1.771  
1.762  
1.754  
1.744  
1.734  
1.719  
1.703  
1.688  
1.674  
1.659  
1.651  
1.640  
1.602  
1.518  
1.500  
1.492  
1.484  
1.473  
1.457  
1.441  
1.432  
1.424  
1.411  
1.324  
1.313  
1.292  
1.255  
1.237  
0.974  
0.956  
0.937  
0.920  
0.903  
0.000

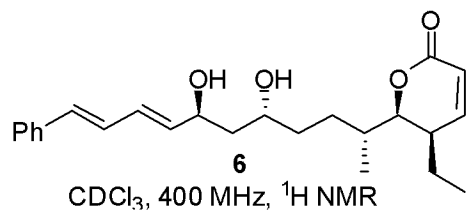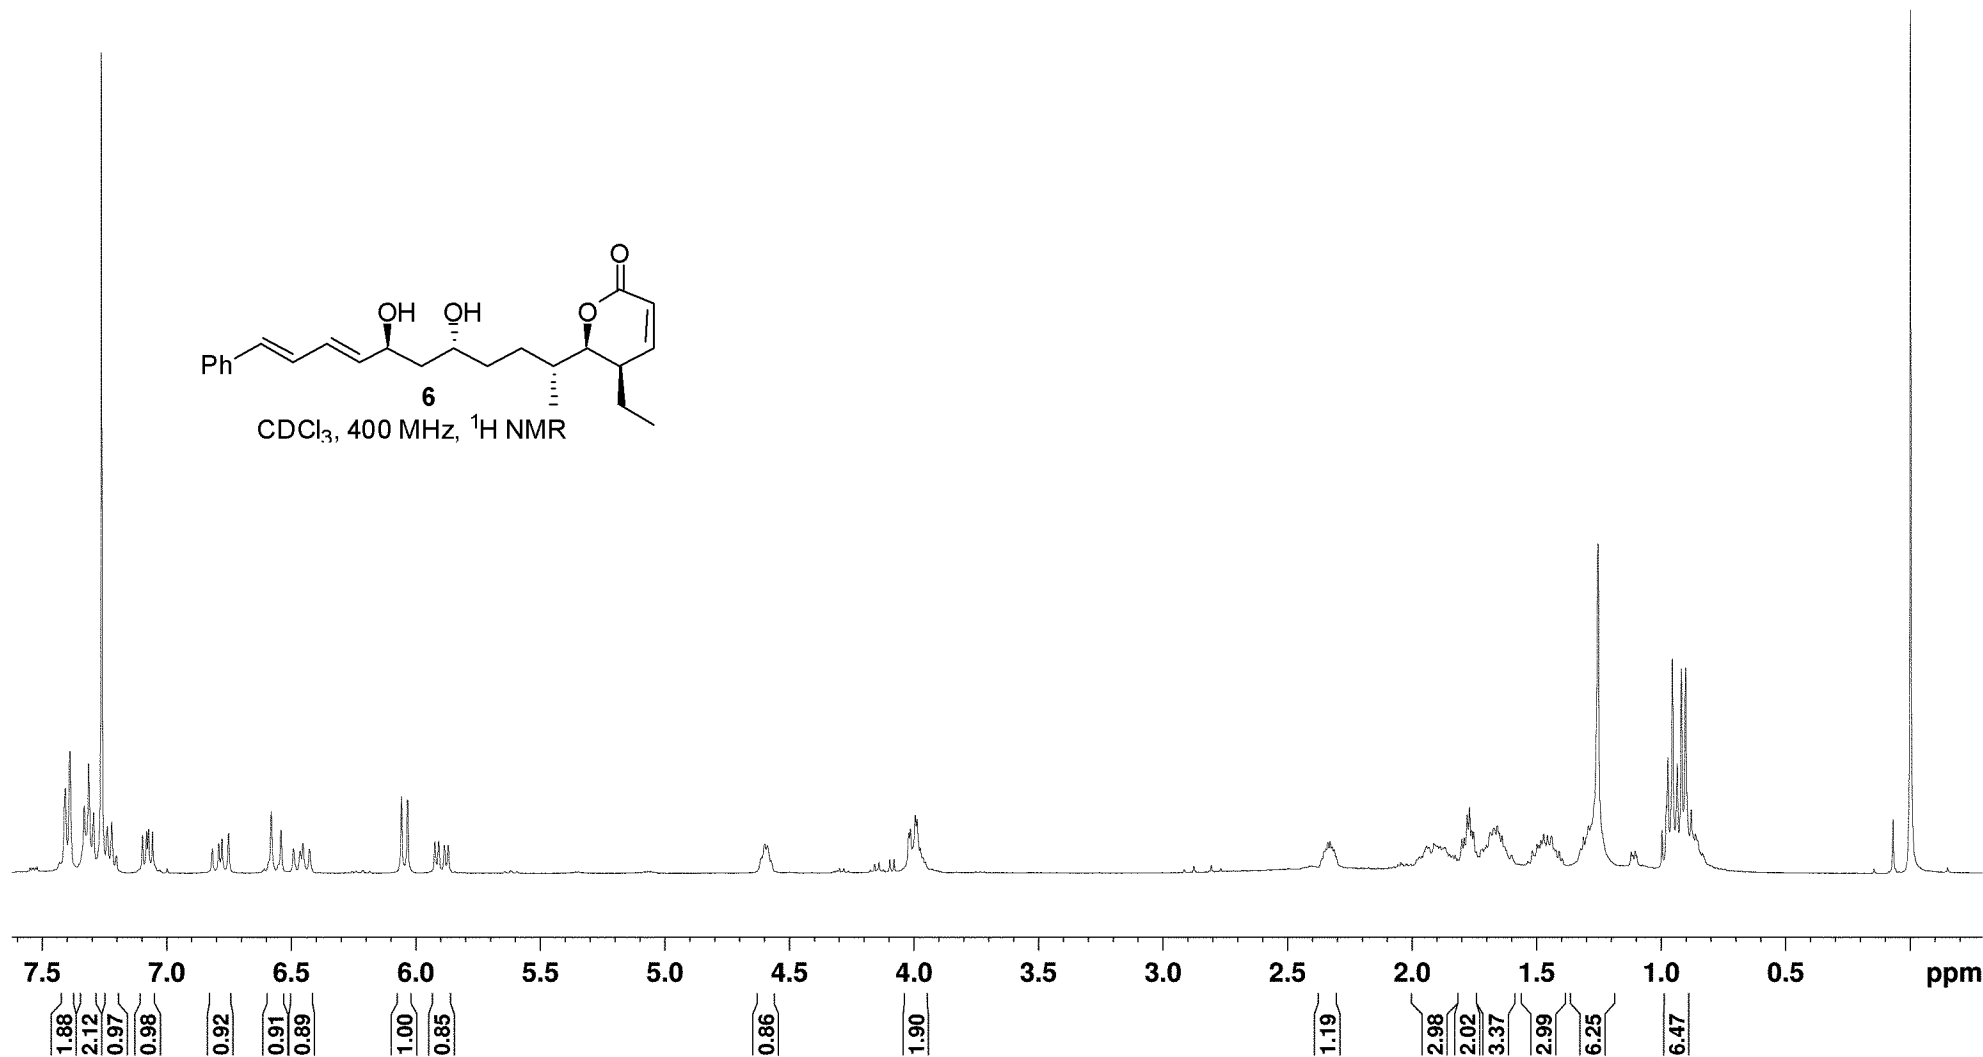



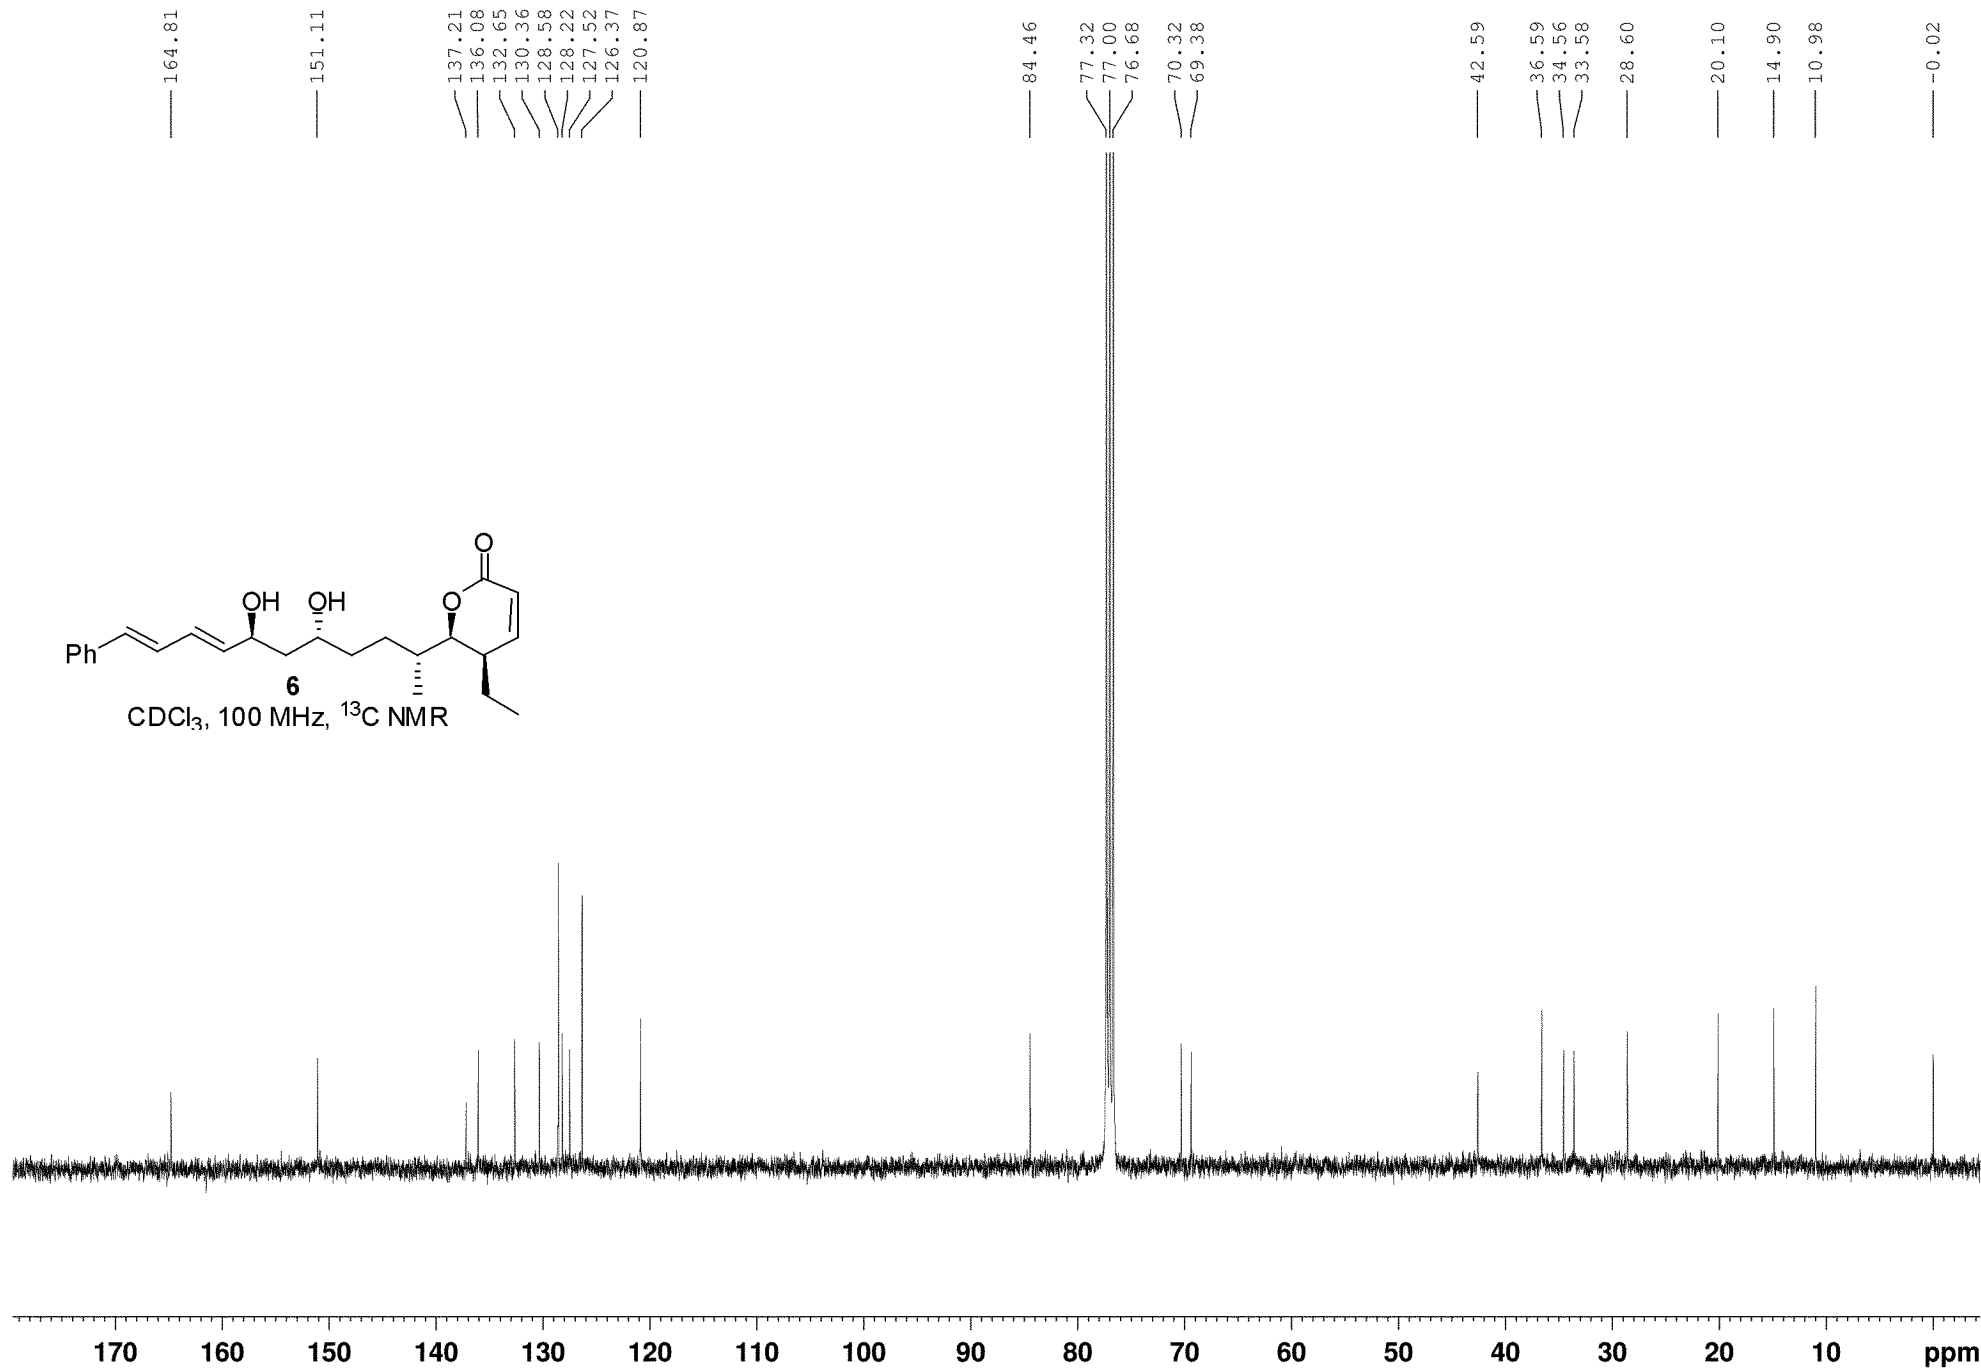

Supplement: Supplementary file 1 [file 4564351]
